# Supplementary material for: Development of Mirrors for the CLAS12 High Threshold Cerenkov Counter
Source: Royal Society of Chemistry journal article supplement (doi:10.1039/c8ob00378e), 2009-11-13
Supplement: c8ob00378e1.pdf [file c8ob00378e1.pdf]

## **First characterisation of two important postulated intermediates in the formation of the HydT DNA lesion, a thymidine oxidation product.**

Emmanuel E. Psykarakis, Elli Chatzopoulou and Thanasis Gimisis\*

*Organic Chemistry Laboratory, Department of Chemistry, National and Kapodistrian University of Athens, 10571, Athens, Greece.*

### ELECTRONIC SUPPLAMENTARY INFORMATION

#### **Table of contents**

|                                                                                  |               |
|----------------------------------------------------------------------------------|---------------|
| Spectra related to the ozonolysis of <b>1c</b>                                   | page S2-S3    |
| Spectra related to the ozonolysis of <b>1a</b>                                   | pages S4-S7   |
| Spectra related to the ozonolysis of <b>1b</b>                                   | pages S8-S17  |
| Spectra related to the <i>de novo</i> synthesis of ribo derivatives              | pages S18-S23 |
| Spectra related to the <i>de novo</i> synthesis of 2-deoxy furanosyl derivatives | pages S24-S35 |
| Spectra related to the <i>de novo</i> synthesis of 2-deoxy pyranosyl derivatives | pagse S36-S49 |

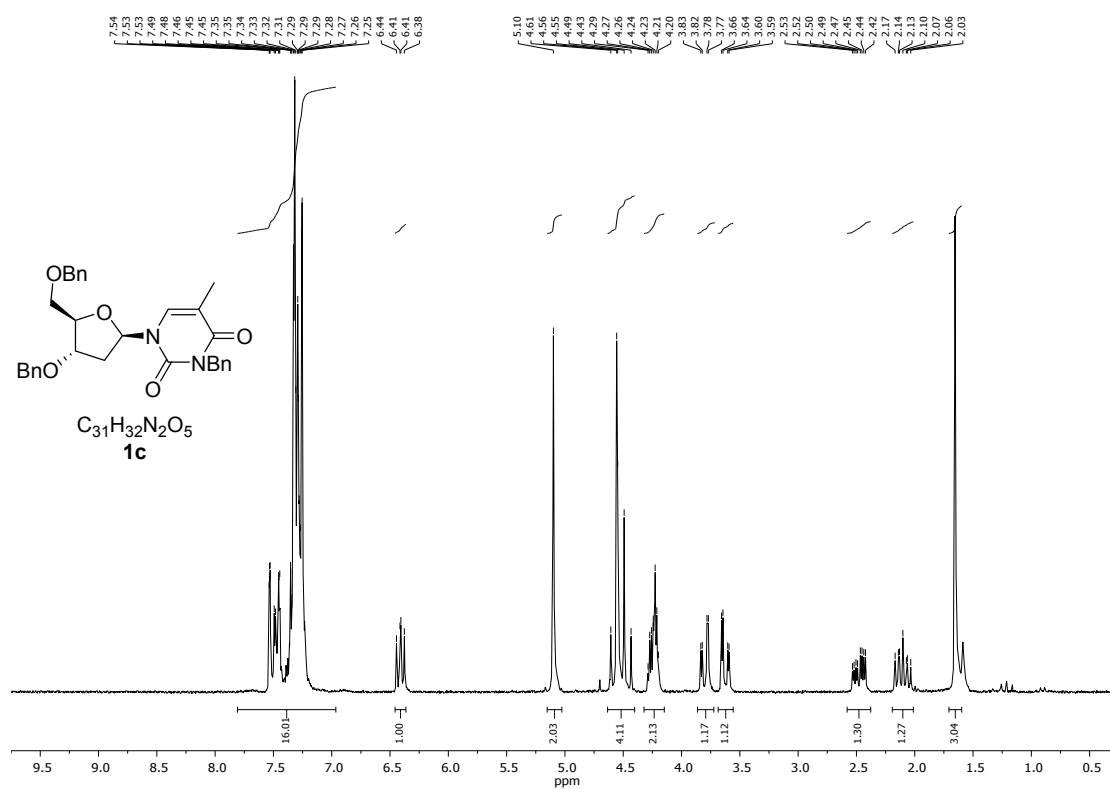

Figure S1:  $^1H$  NMR spectrum of **1c** (200 MHz,  $CDCl_3$ ).

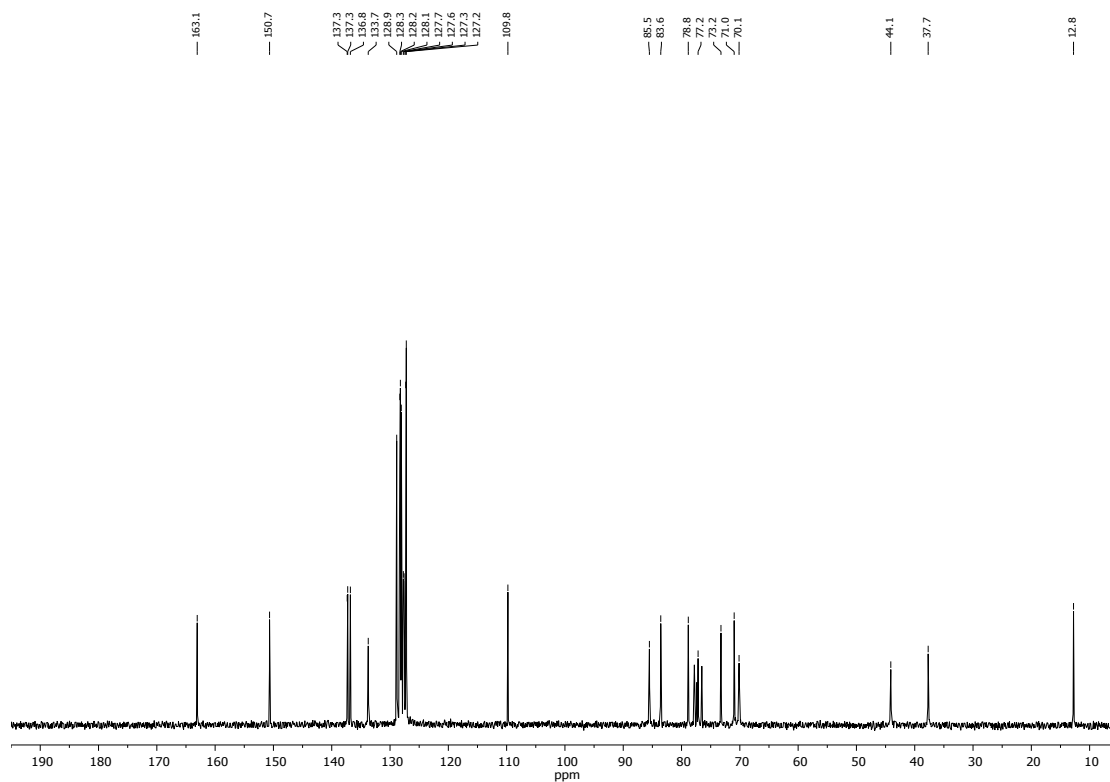

Figure S2:  $^{13}C$  NMR spectrum of **1c** (50 MHz,  $CDCl_3$ ).

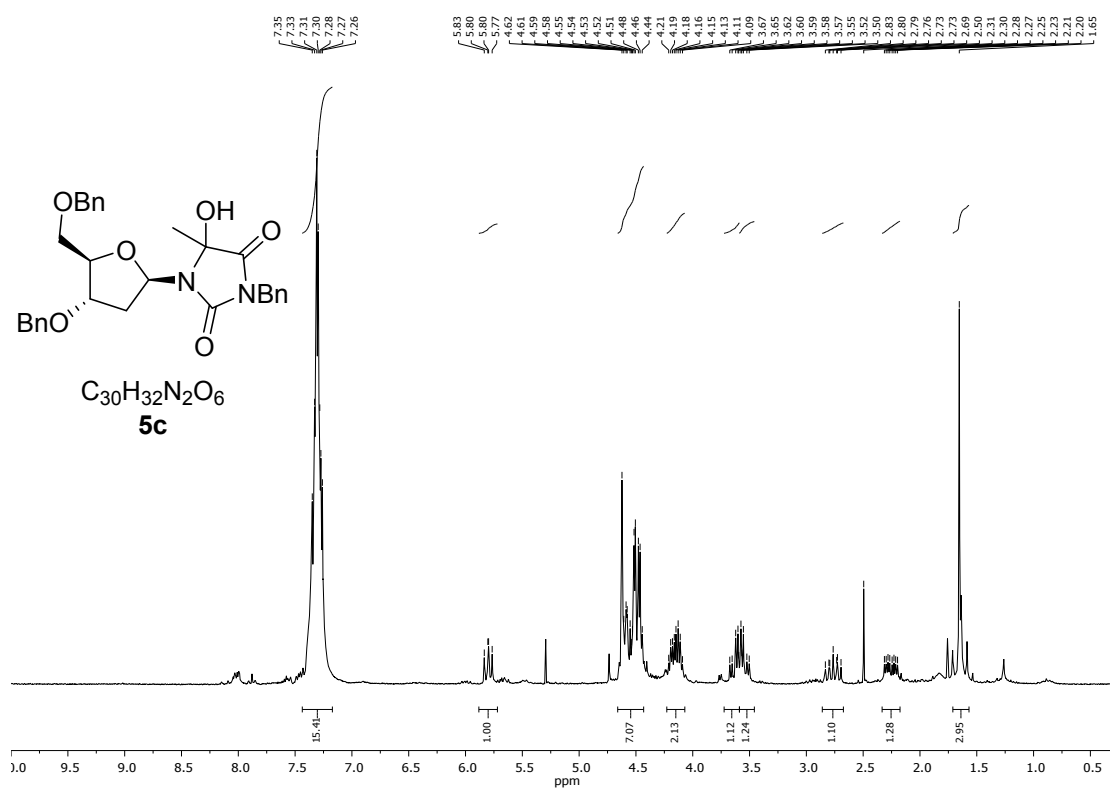

Figure S3:  $^1\text{H}$  NMR spectrum of **5c** (200 MHz,  $\text{CDCl}_3$ ).

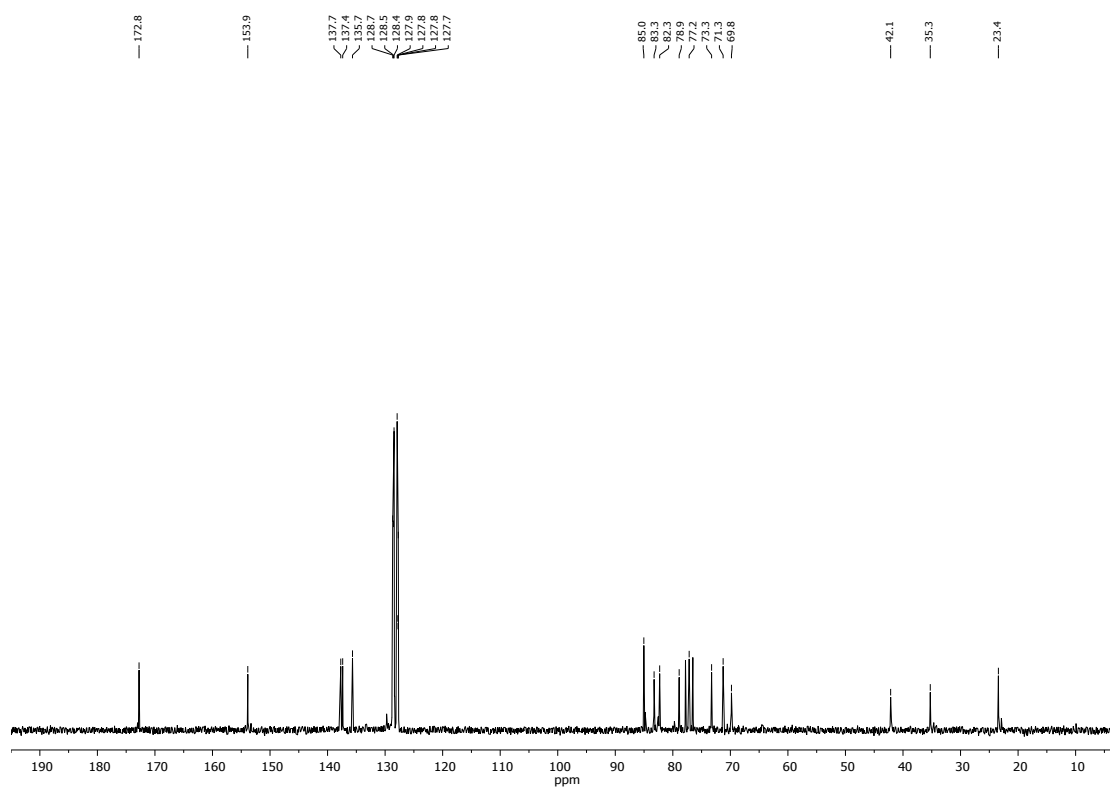

Figure S4:  $^{13}\text{C}$  NMR spectrum of **5c** (50 MHz,  $\text{CDCl}_3$ ).

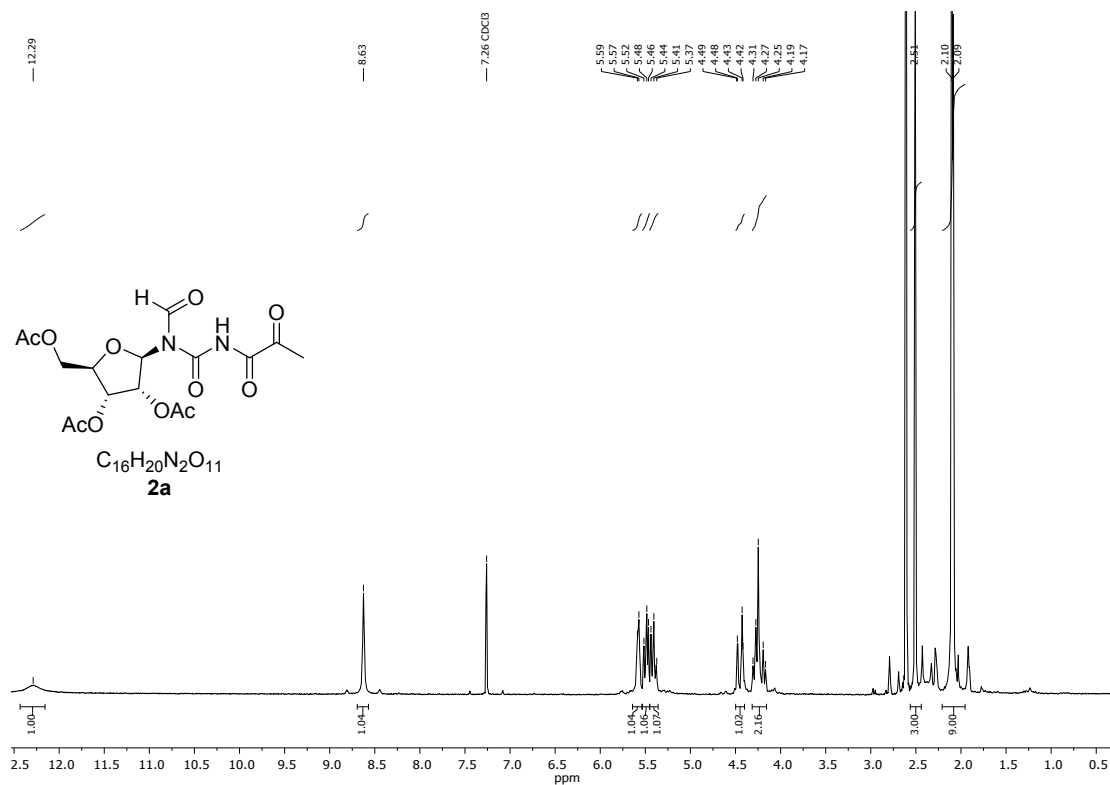

Figure S5:  $^1H$  NMR spectrum of crude ozonolysis product **2a** (200 MHz,  $CDCl_3$ ).

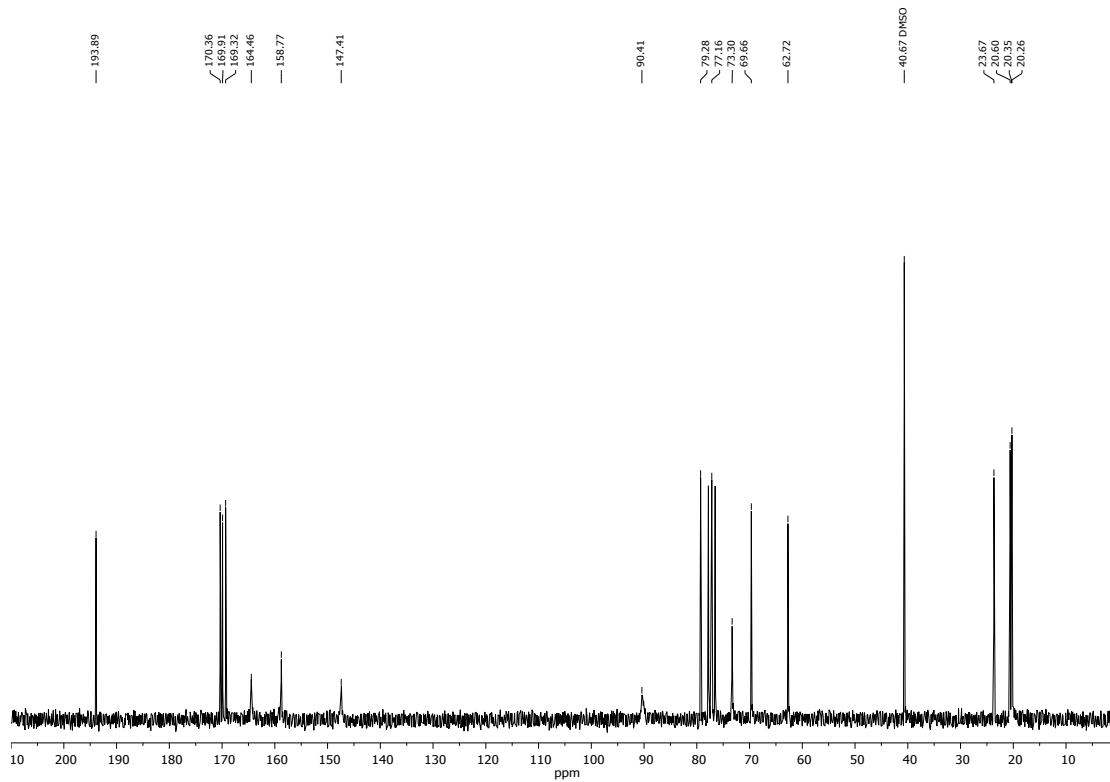

Figure S6:  $^{13}C$  NMR spectrum of crude ozonolysis product **2a** (50 MHz,  $CDCl_3$ ).

MPS017ESI+1#8 RT: 0.12 AV: 1 NL: 1.41E7  
 T: {0,0} + p ESI corona sid=25.00 det=1106.00 Full ms [150.00-950.00]

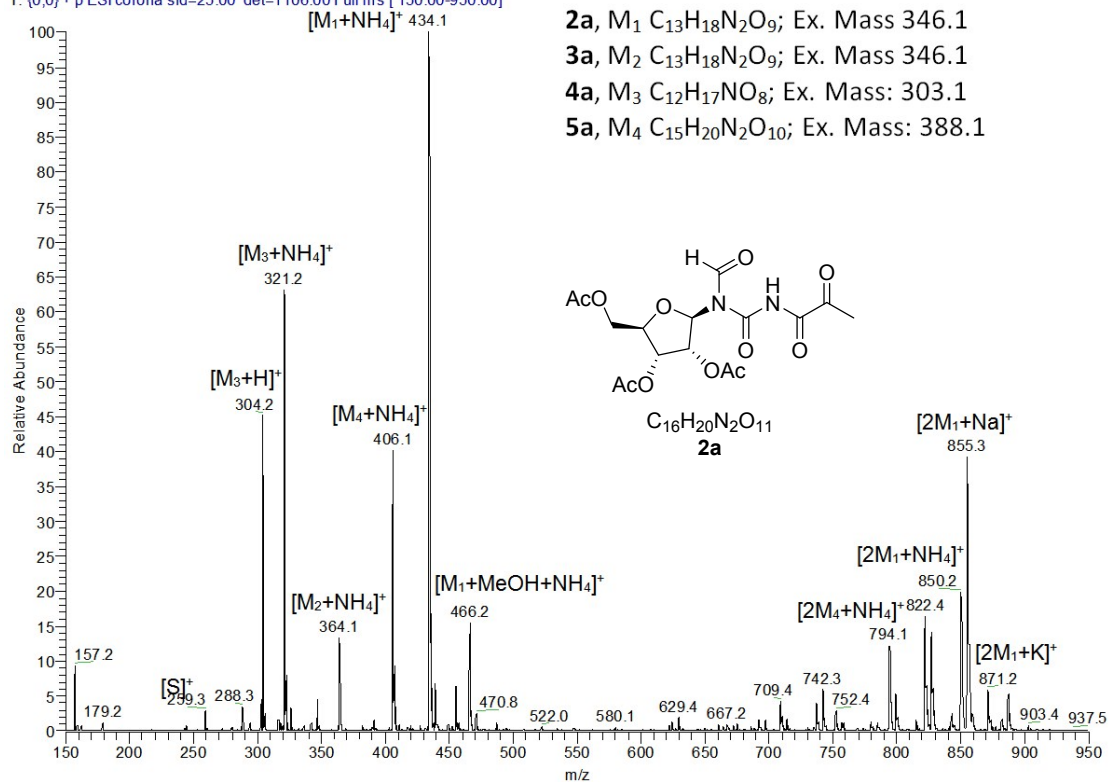

Figure S7: MS (ESI<sup>+</sup>) spectrum of crude ozonolysis product **2a**.

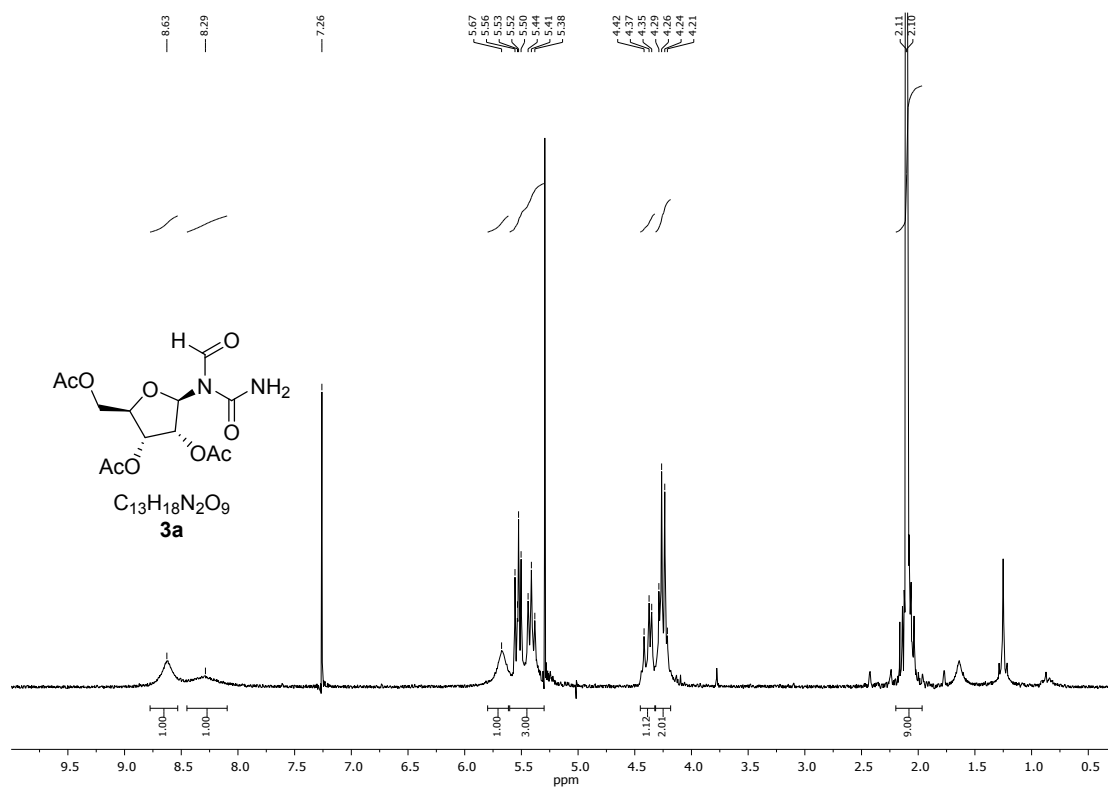

Figure S8: <sup>1</sup>H NMR spectrum of compound **3a** (200 MHz, CDCl<sub>3</sub>).

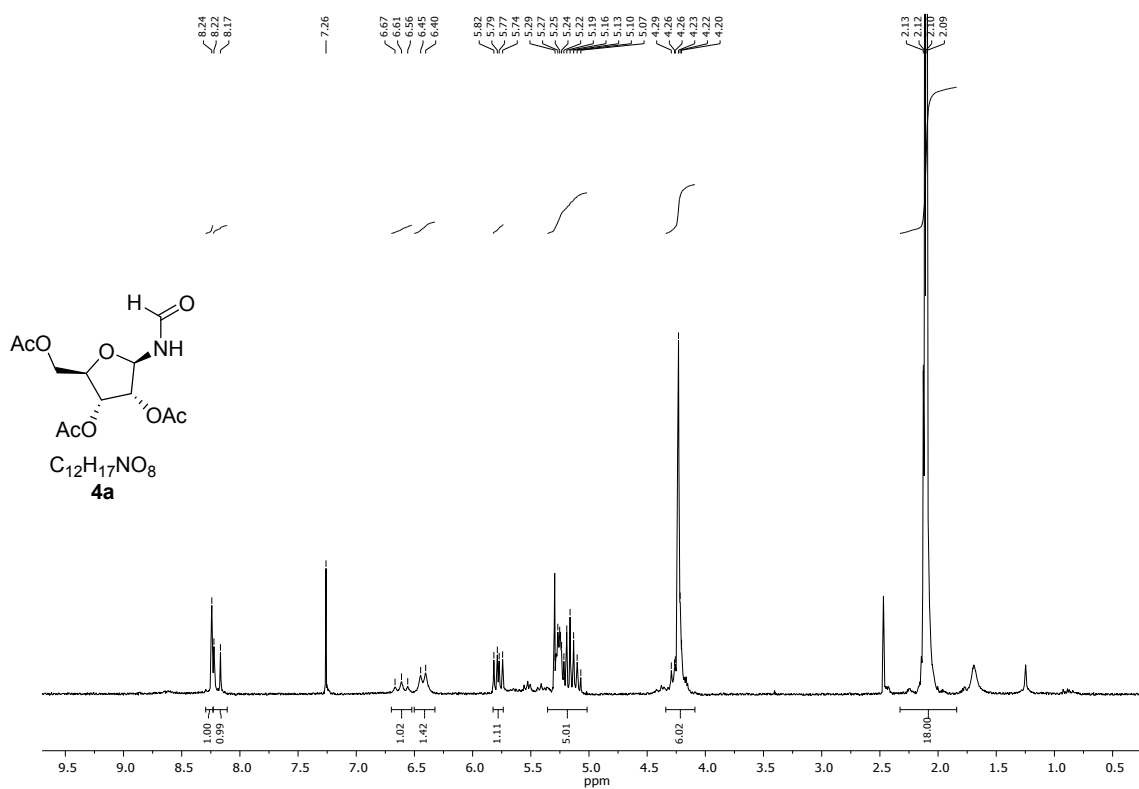

Figure S9:  $^1H$  NMR spectrum of compound **4a** (200 MHz,  $CDCl_3$ ).

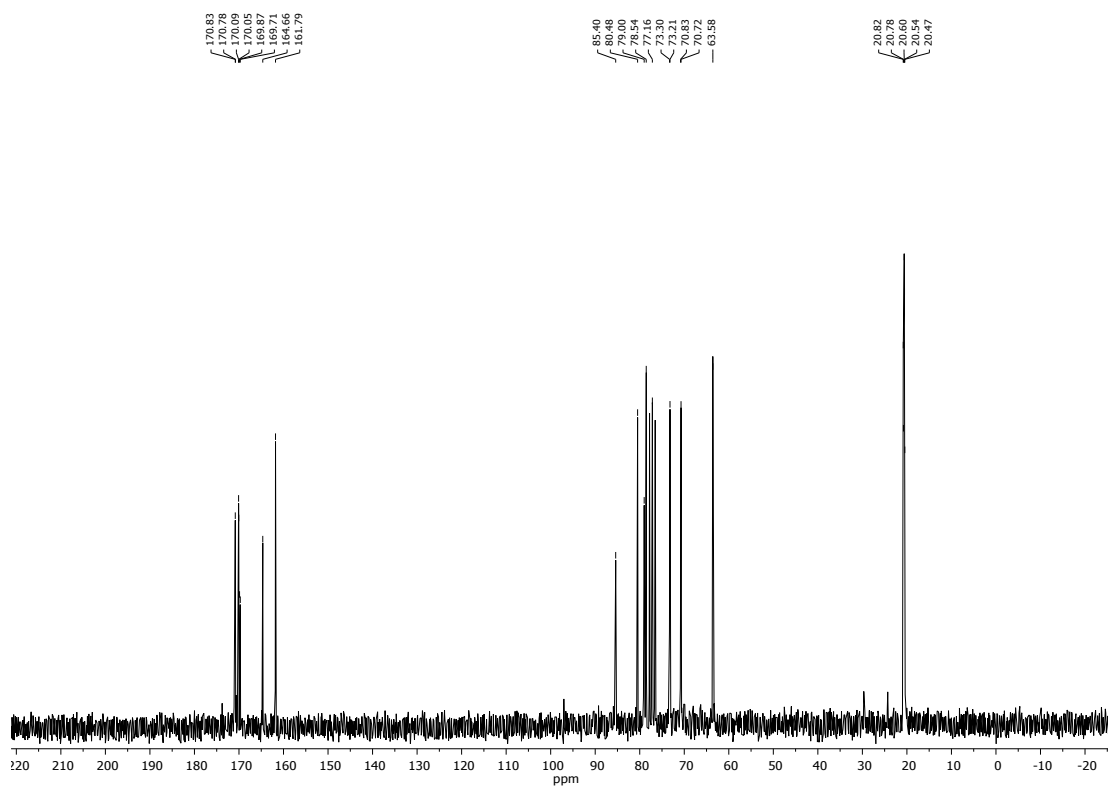

Figure S10:  $^{13}C$  NMR spectrum of compound **4a** (50 MHz,  $CDCl_3$ ).

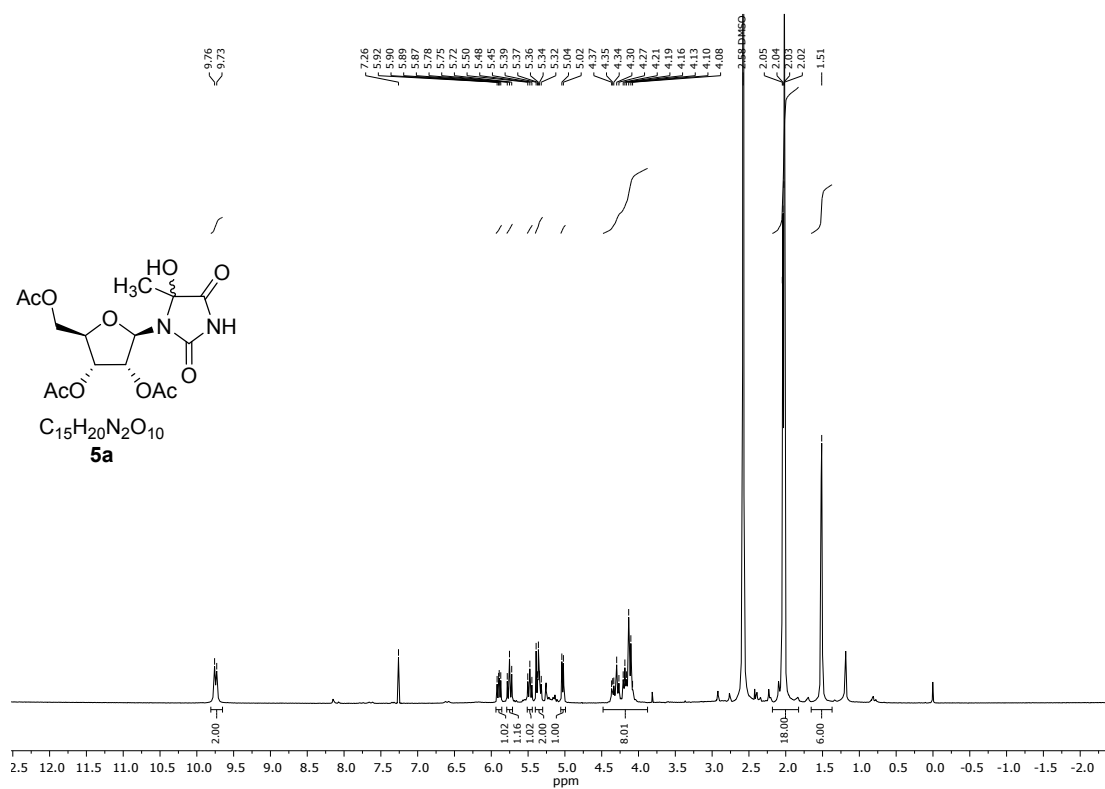

Figure S11:  $^1H$  NMR spectrum of compound **5a** (200 MHz,  $CDCl_3$ ).

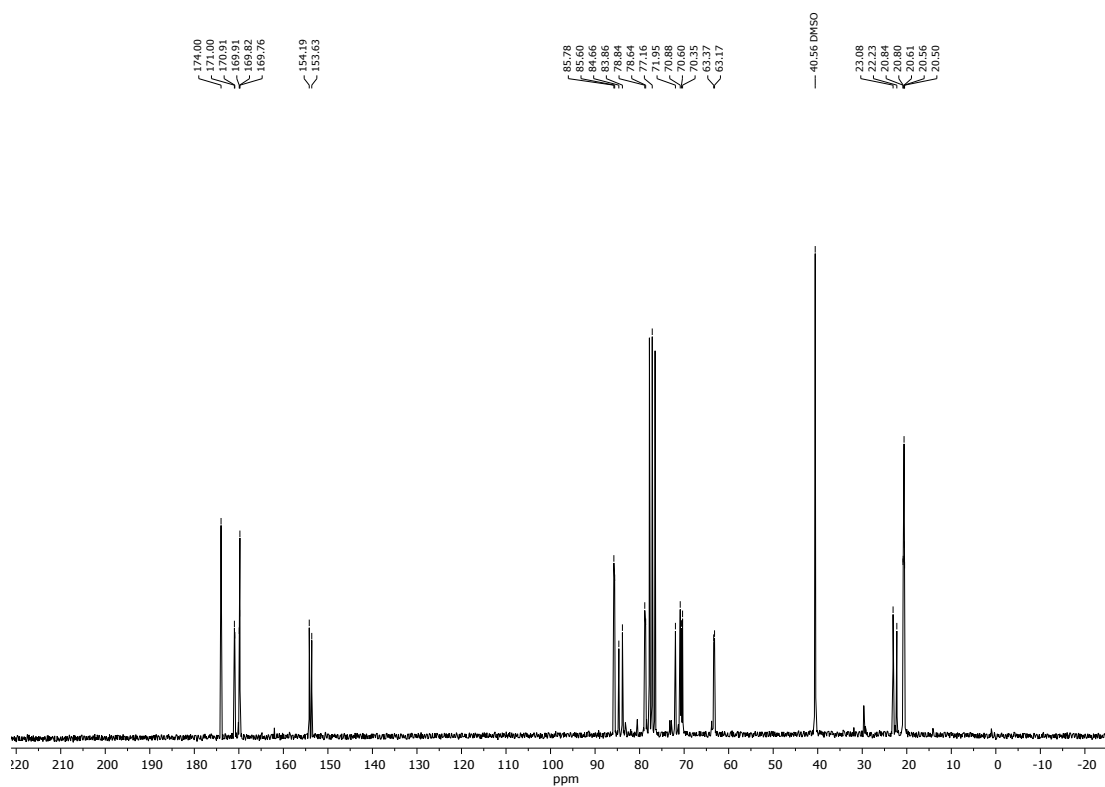

Figure S12:  $^{13}C$  NMR spectrum of compound **5a** (50 MHz,  $CDCl_3$ ).

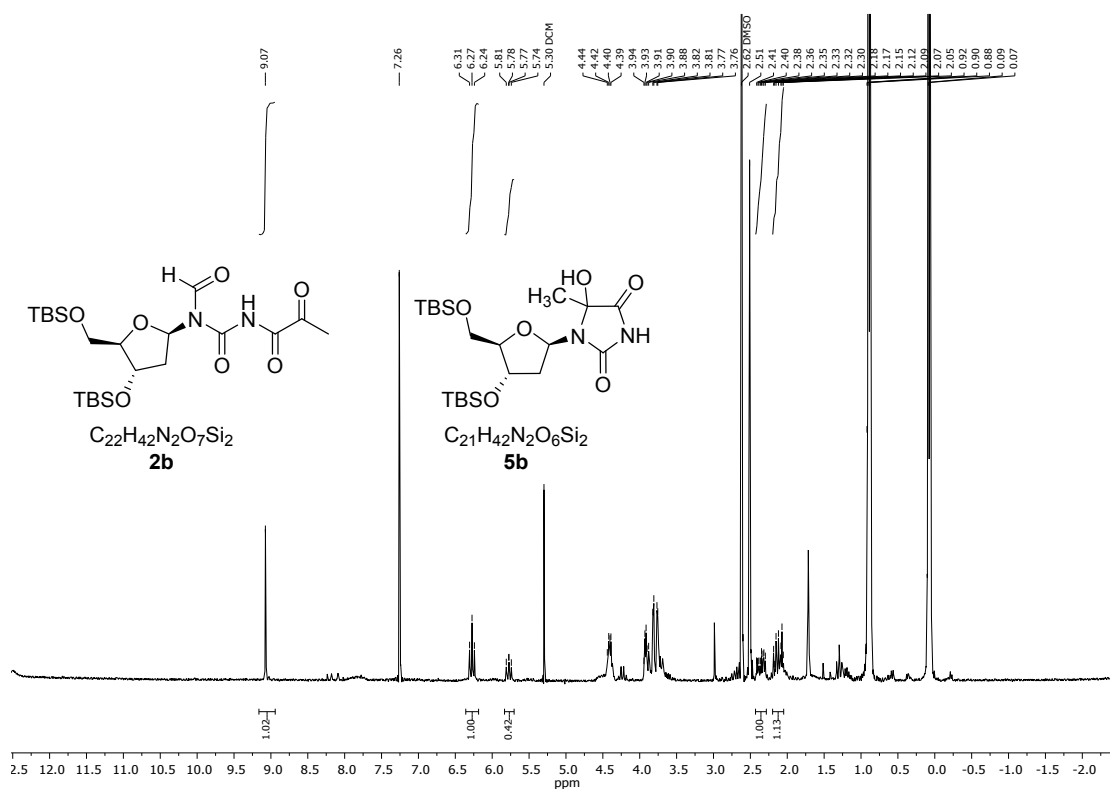

Figure S13: <sup>1</sup>H NMR spectrum of crude ozonolysis product (**2b** & **5b**) (200 MHz, CDCl<sub>3</sub>).

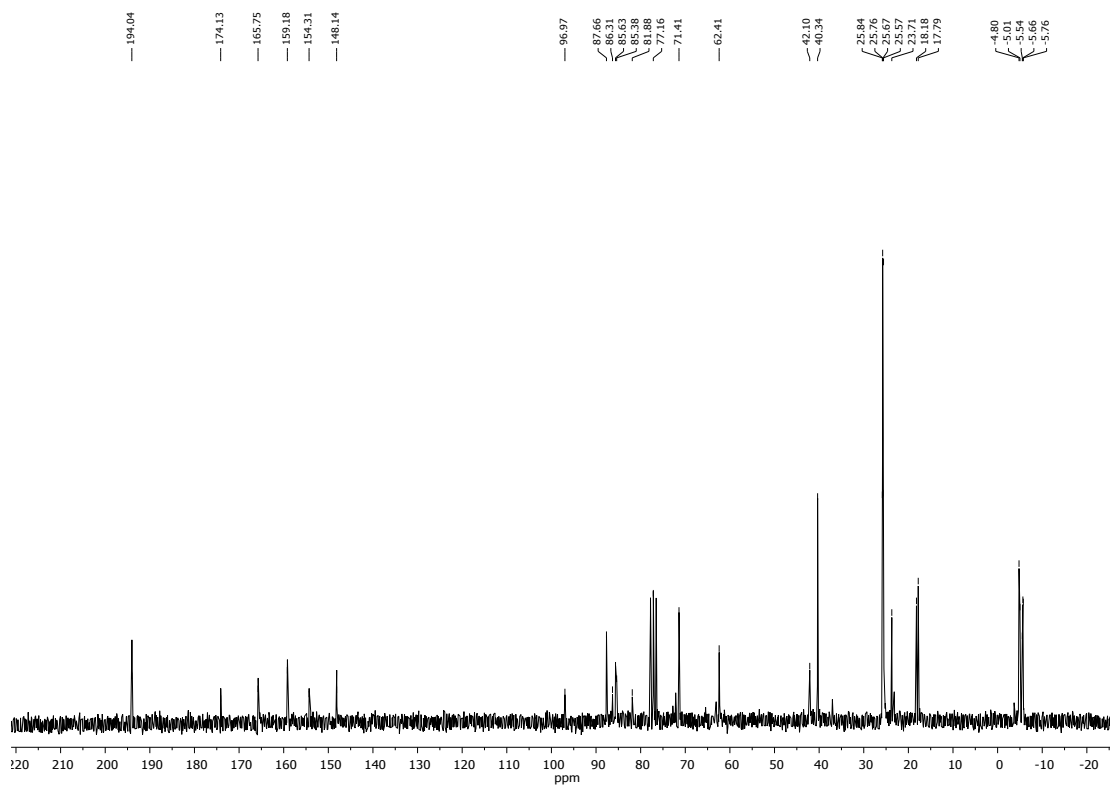

Figure S14: <sup>13</sup>C NMR spectrum of crude ozonolysis product (**2b** & **5b**) (50 MHz, CDCl<sub>3</sub>).



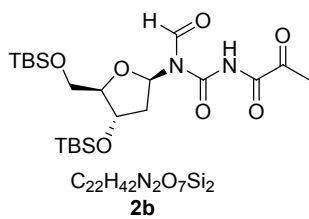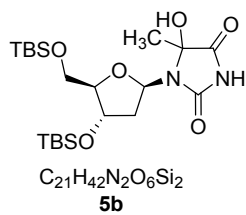

EX12\_cr\_ESI+4 #4-12 RT: 0.05-0.19 AV: 9 NL: 5.58E6

T: {0,0} +p ESI corona sid=25.00 det=1106.00 Full ms [100.00-1100.00]

**2b**,  $M_1$ :  $C_{22}H_{42}N_2O_7Si_2$ ; Ex. Mass: 502.2

**3b**,  $M_2$ :  $C_{19}H_{40}N_2O_5Si_2$ ; Ex. Mass: 432.2

**4b**,  $M_3$ :  $C_{18}H_{39}NO_4Si_2$ ; Ex. Mass: 389.2

**5b**,  $M_4$ :  $C_{21}H_{42}N_2O_6Si_2$ ; Ex. Mass: 474.3

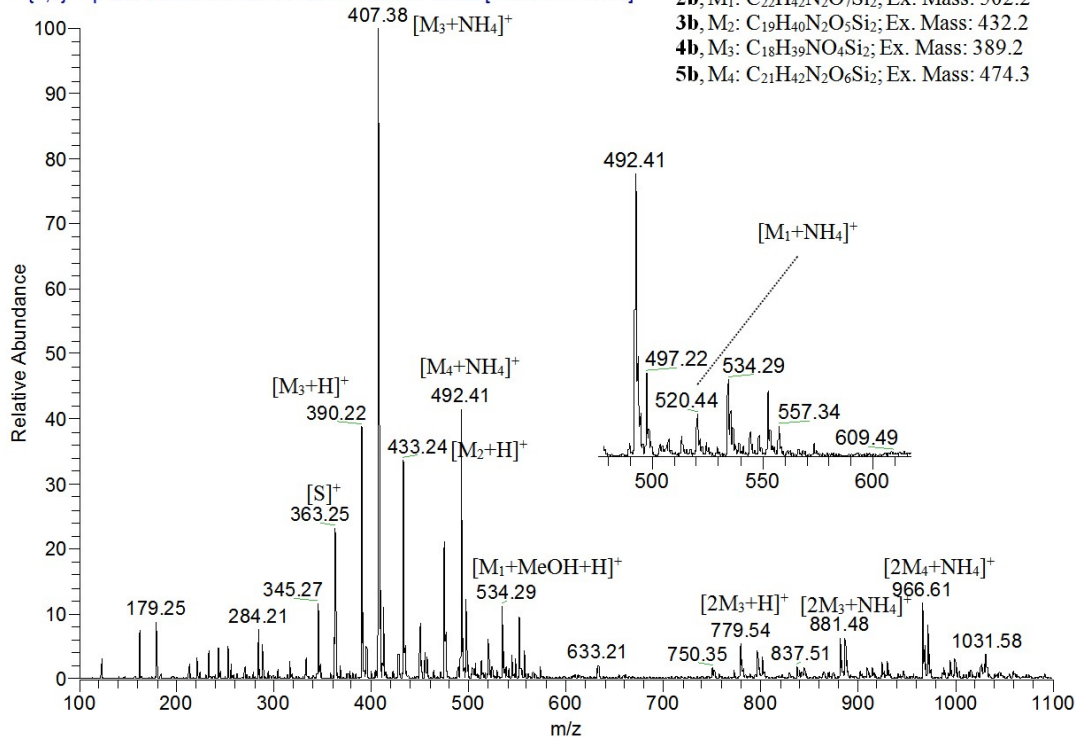

Figure S15: MS (ESI<sup>+</sup>) spectrum of crude ozonolysis product (**2b** & **5b**).

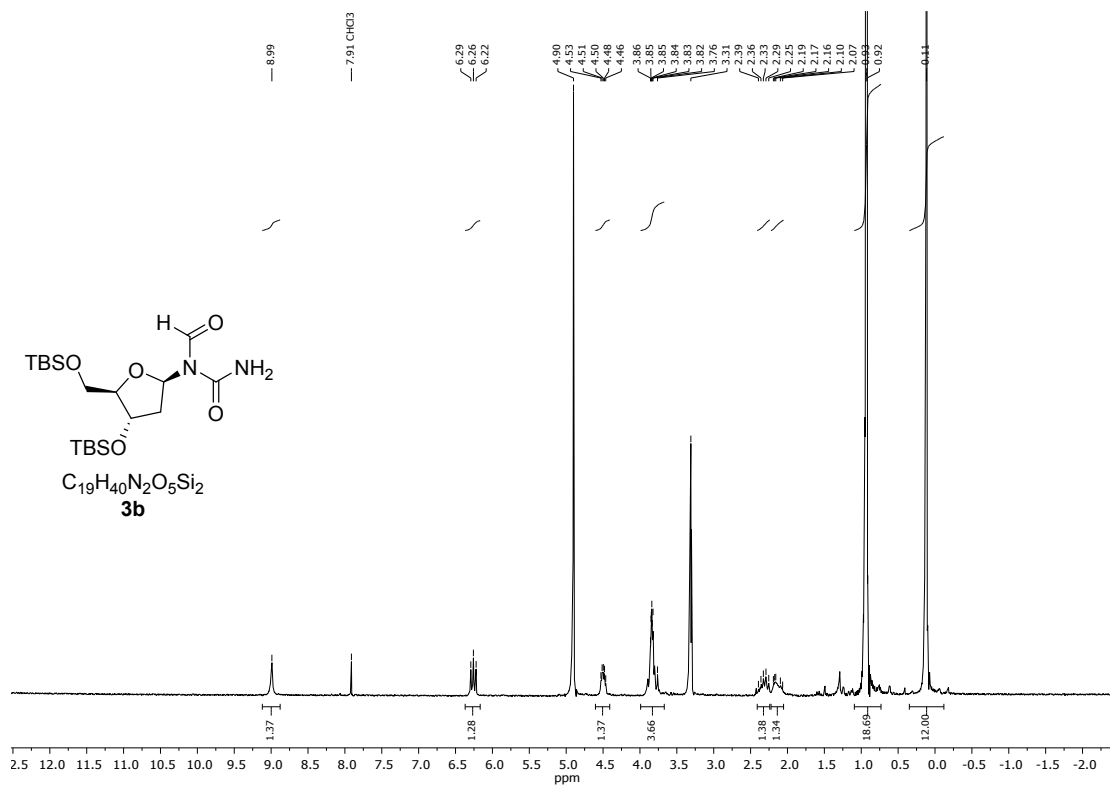

Figure S16: <sup>1</sup>H NMR spectrum of compound **3b** (200 MHz, CDCl<sub>3</sub>).

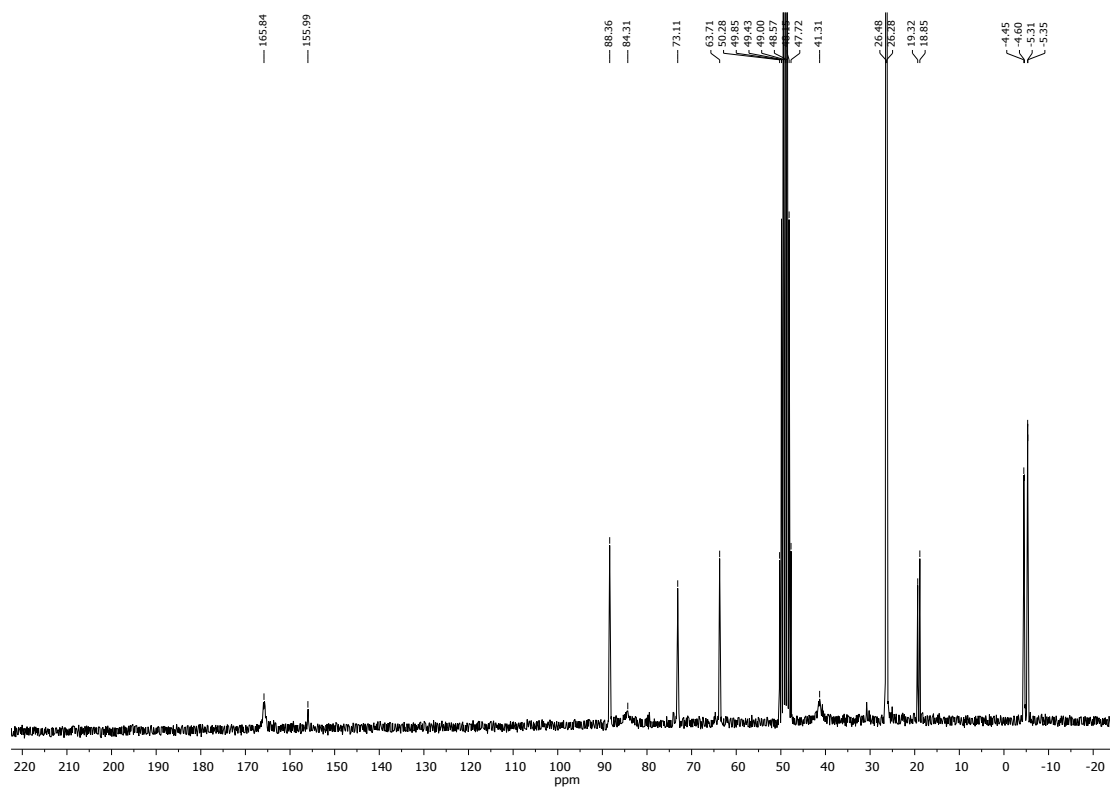

Figure S17: <sup>13</sup>C NMR spectrum of **3b** (50 MHz, CDCl<sub>3</sub>).

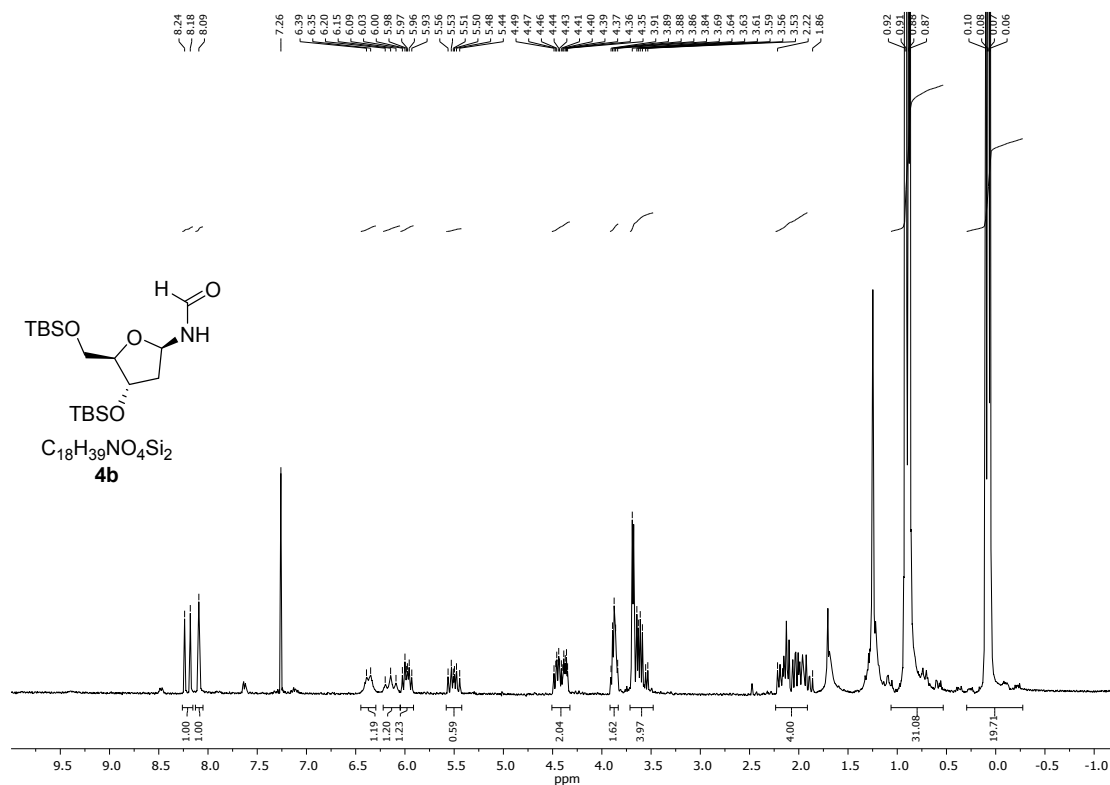

Figure S18: <sup>1</sup>H NMR spectrum of compound **4b** (200 MHz, CDCl<sub>3</sub>).

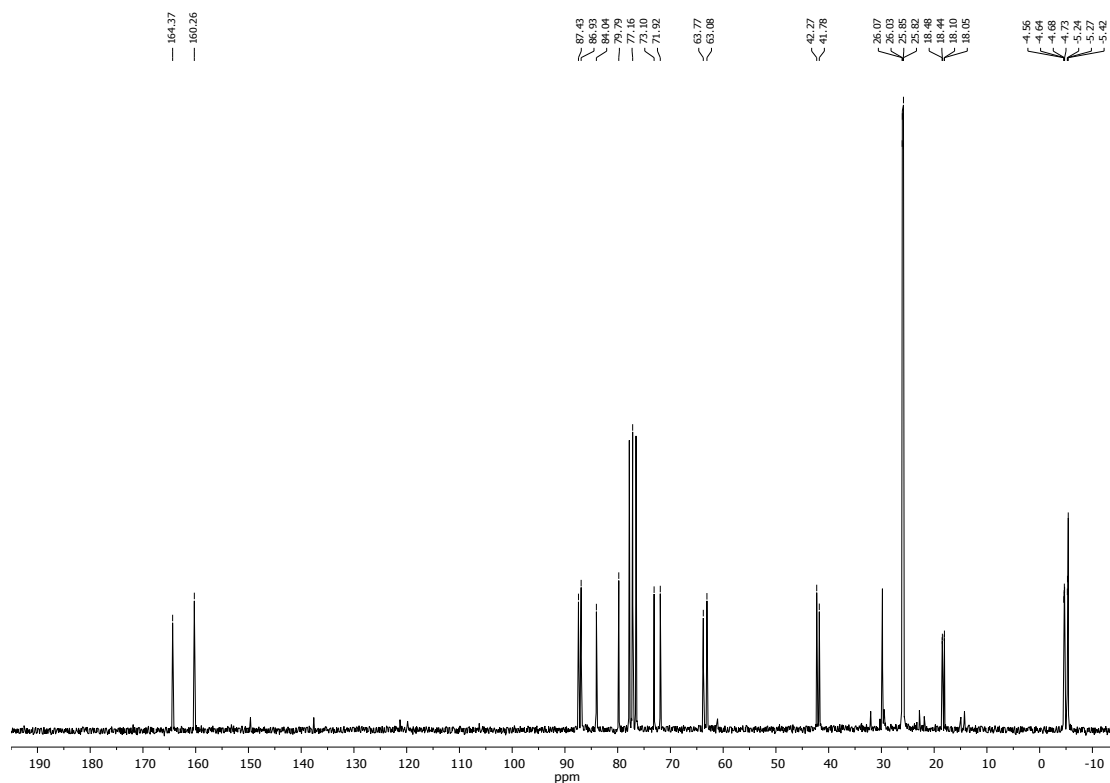

Figure S19: <sup>13</sup>C NMR spectrum of **4b** (50 MHz, CDCl<sub>3</sub>).

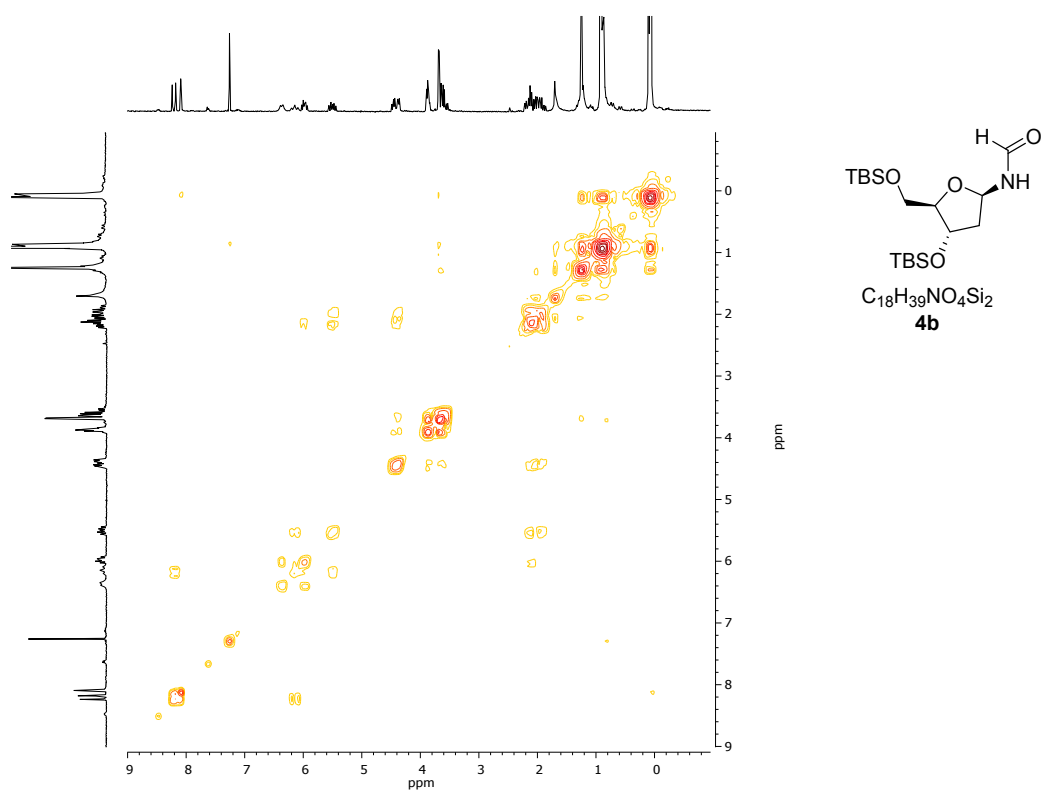

Figure S20: 2D-COSY spectrum of compound **4b** (200 MHz, CDCl<sub>3</sub>).

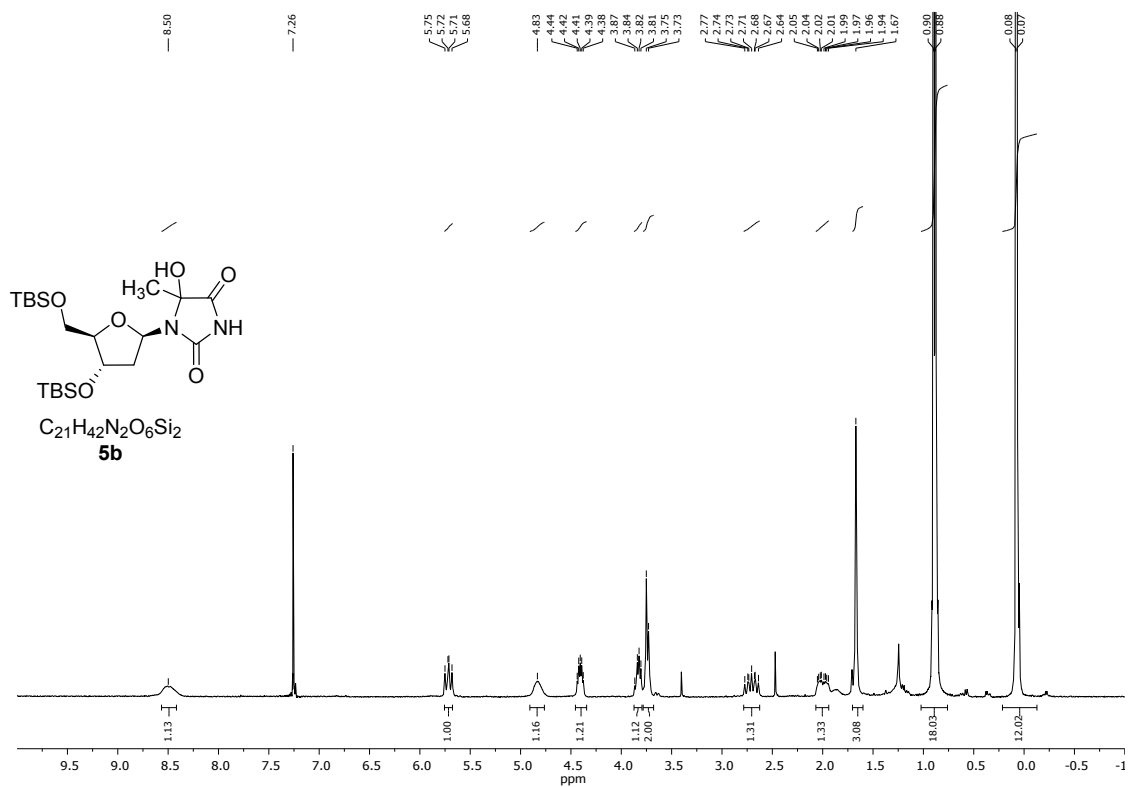

Figure S21:  $^1\text{H}$  NMR spectrum of **5b** (200 MHz,  $\text{CDCl}_3$ ).

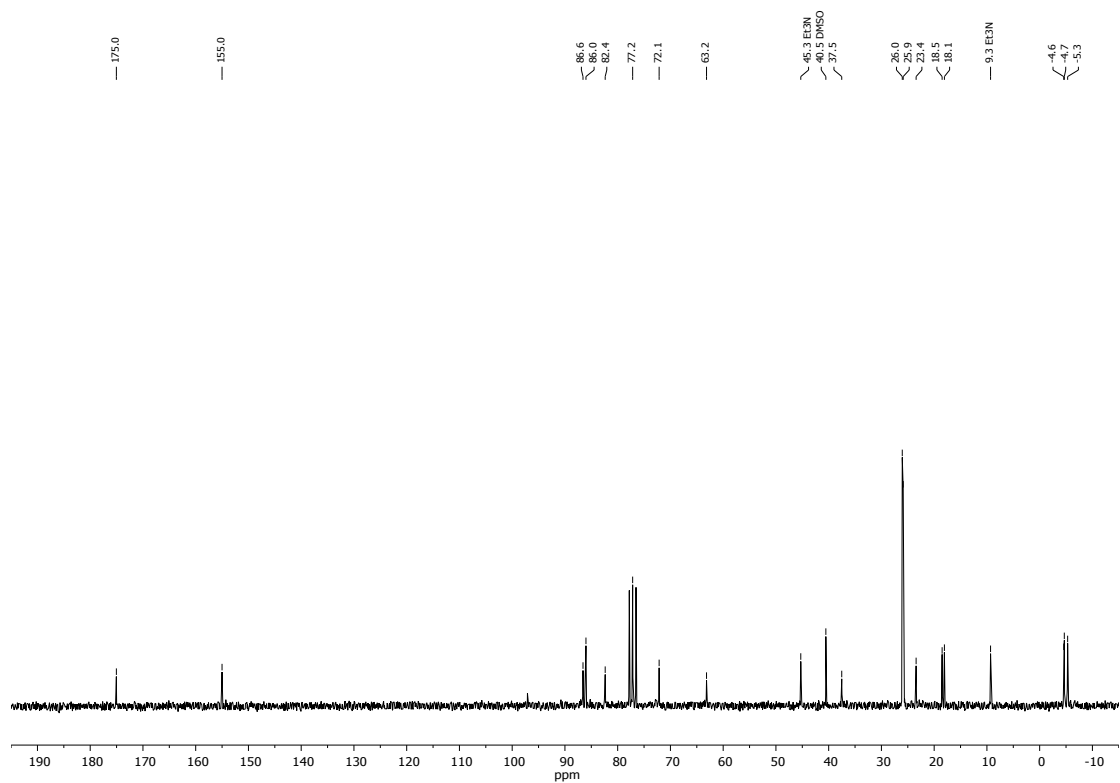

Figure S22:  $^{13}\text{C}$  NMR spectrum of **5b** (50 MHz,  $\text{CDCl}_3$ ).

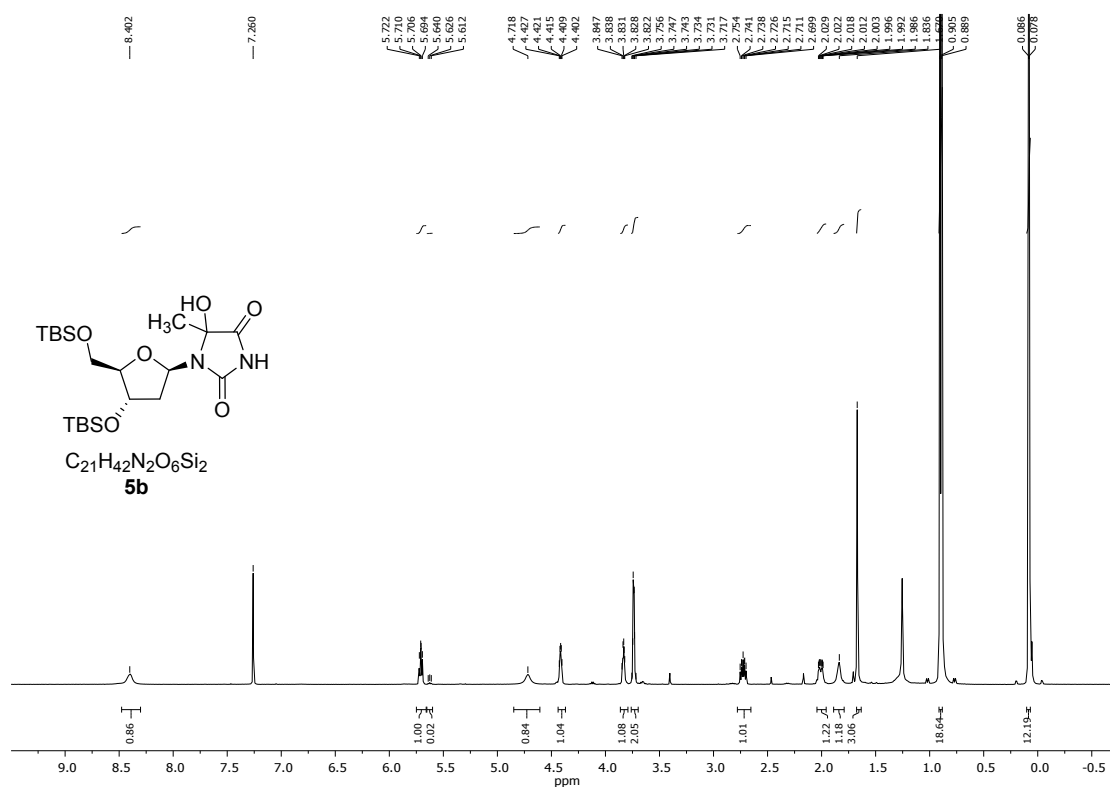

Figure S23:  $^1\text{H}$  NMR spectrum of **5b** (500 MHz,  $\text{CDCl}_3$ ).

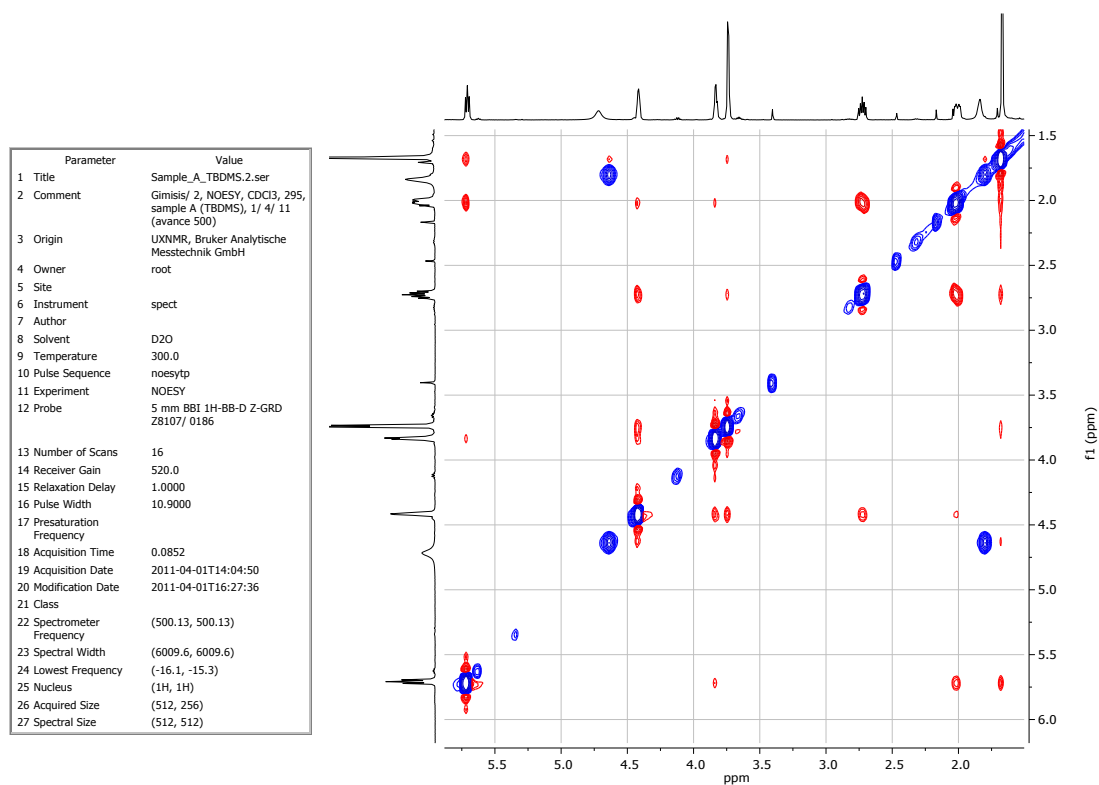

Figure S24: 2D-NOESY spectrum of **5b** (500 MHz,  $\text{CDCl}_3$ ).

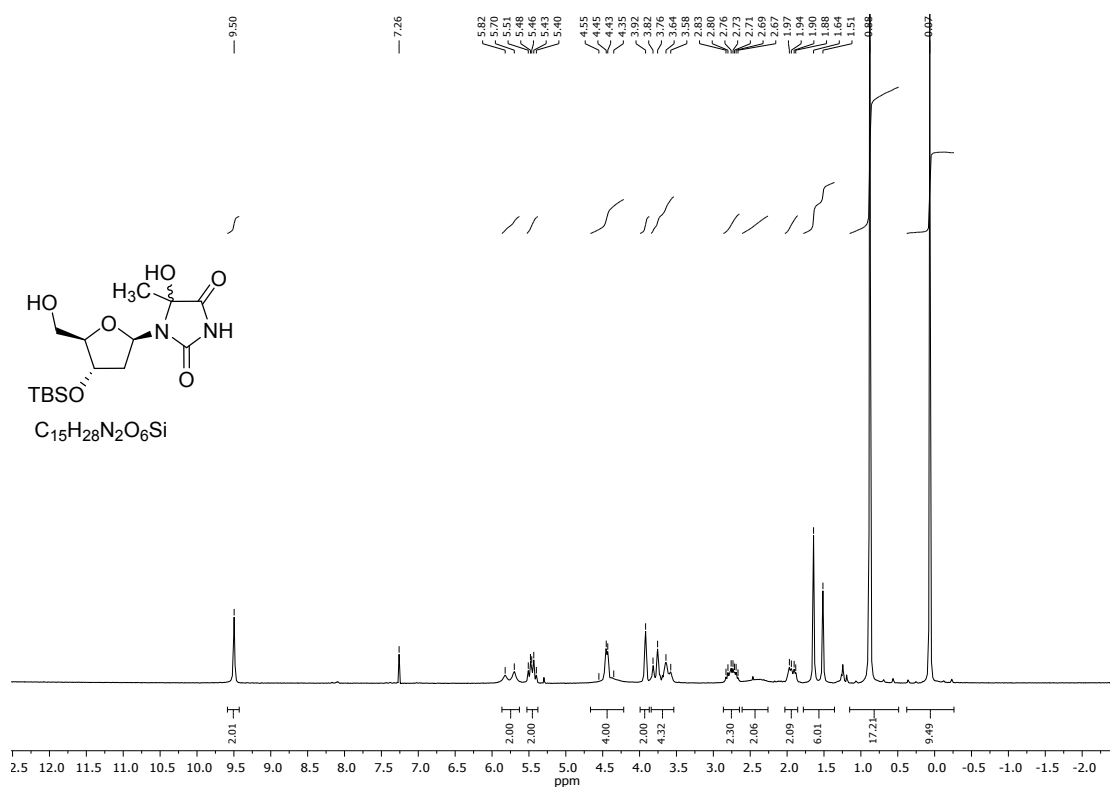

Figure S25:  $^1\text{H}$  NMR spectrum of **5b'** (200 MHz,  $\text{CDCl}_3$ ).

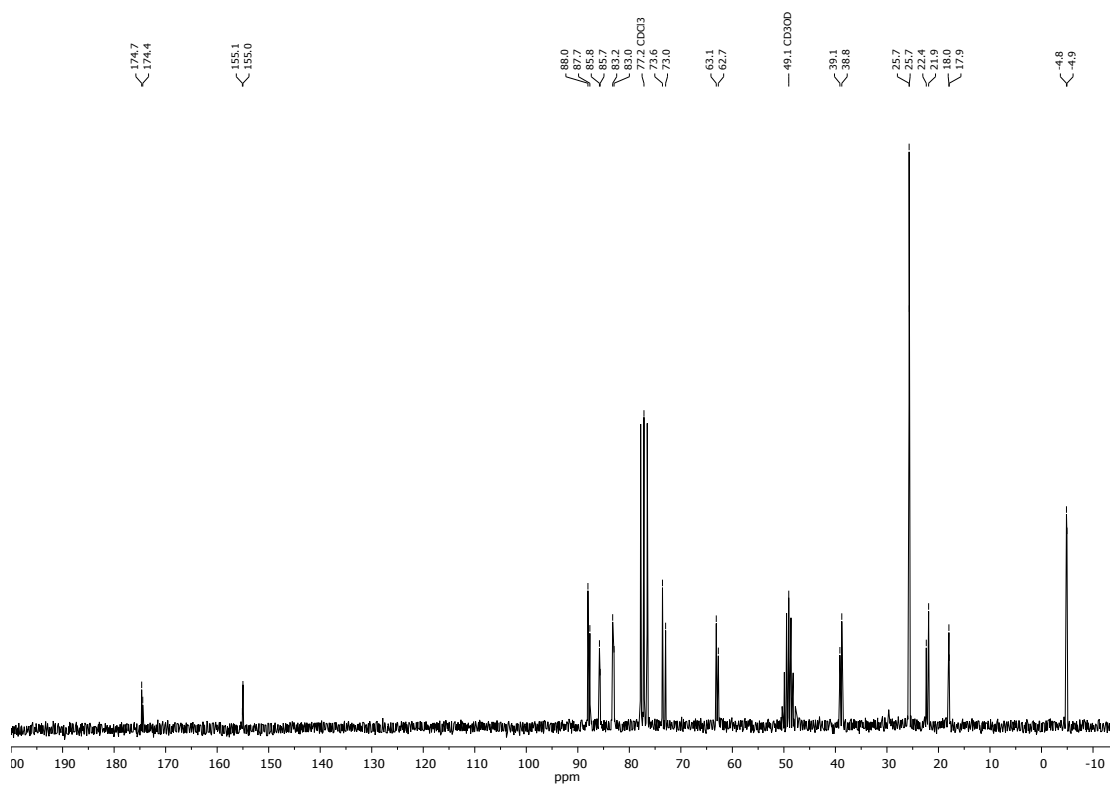

Figure S26: Figure S27:  $^{13}\text{C}$  NMR spectrum of **5b'** (50 MHz,  $\text{CDCl}_3$ ).

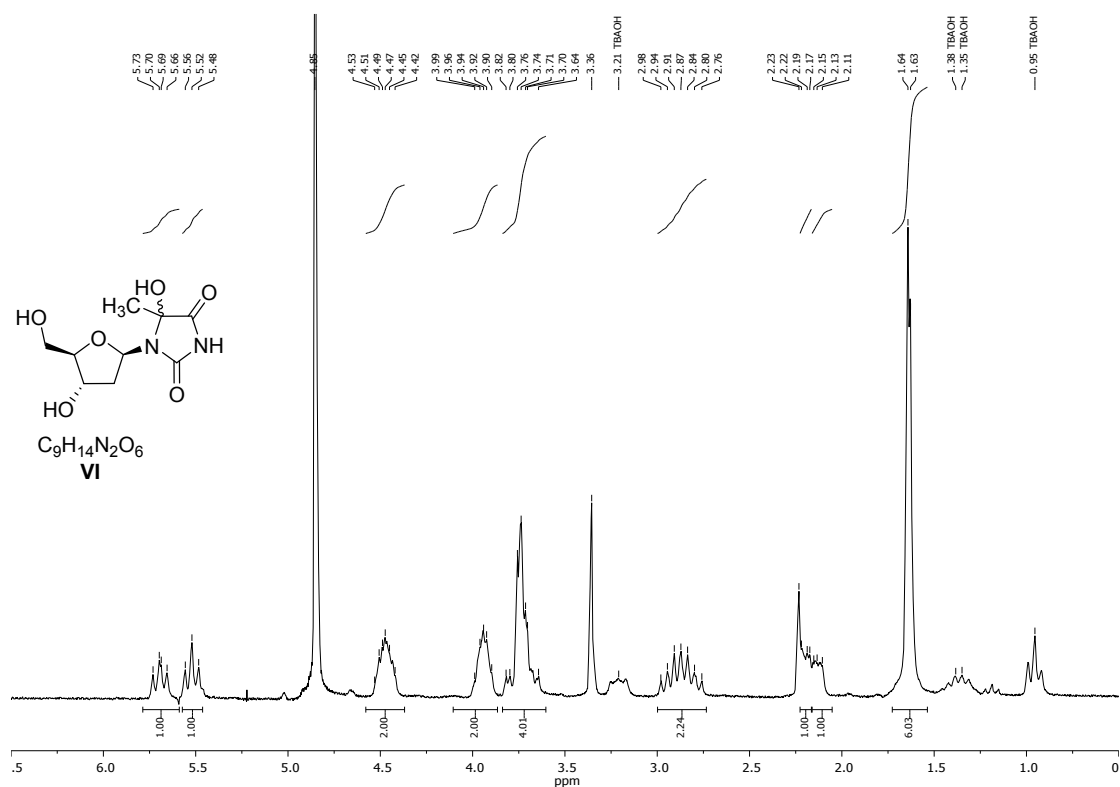

Figure S28:  $^1H$  NMR spectrum of VI (200 MHz,  $D_2O$ ).

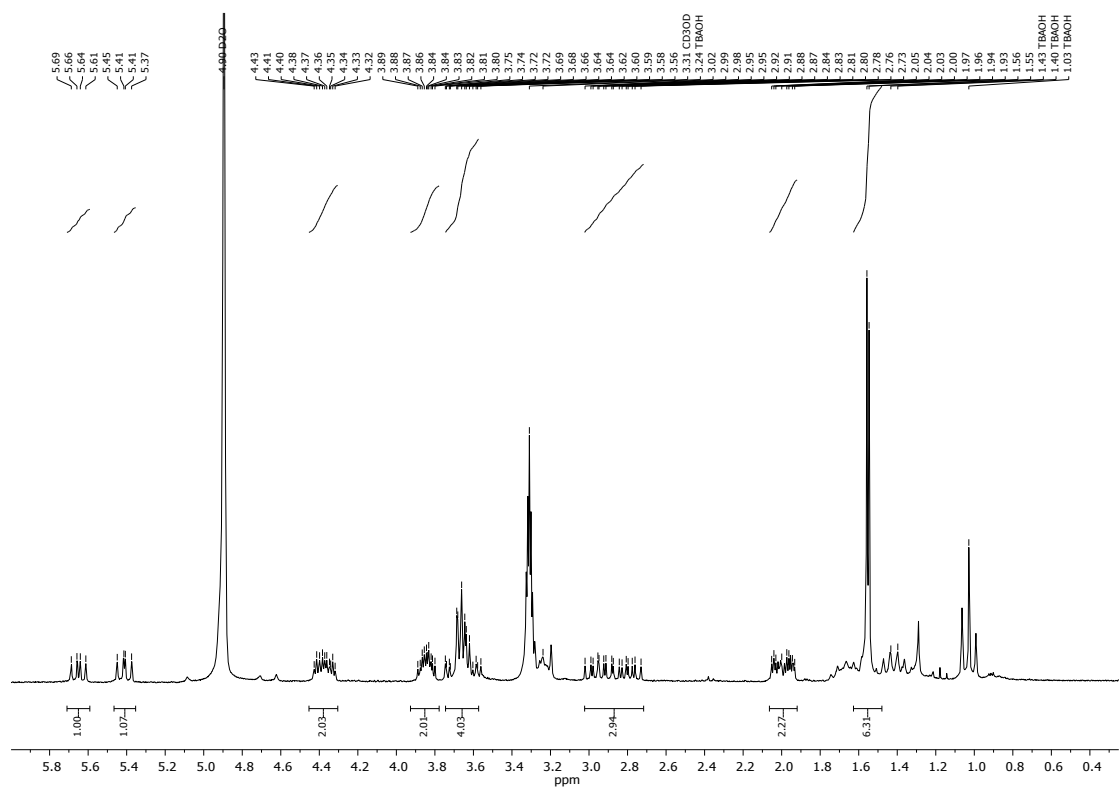

Figure S29:  $^1H$  NMR spectrum of VI (200 MHz,  $CD_3OD$ ).



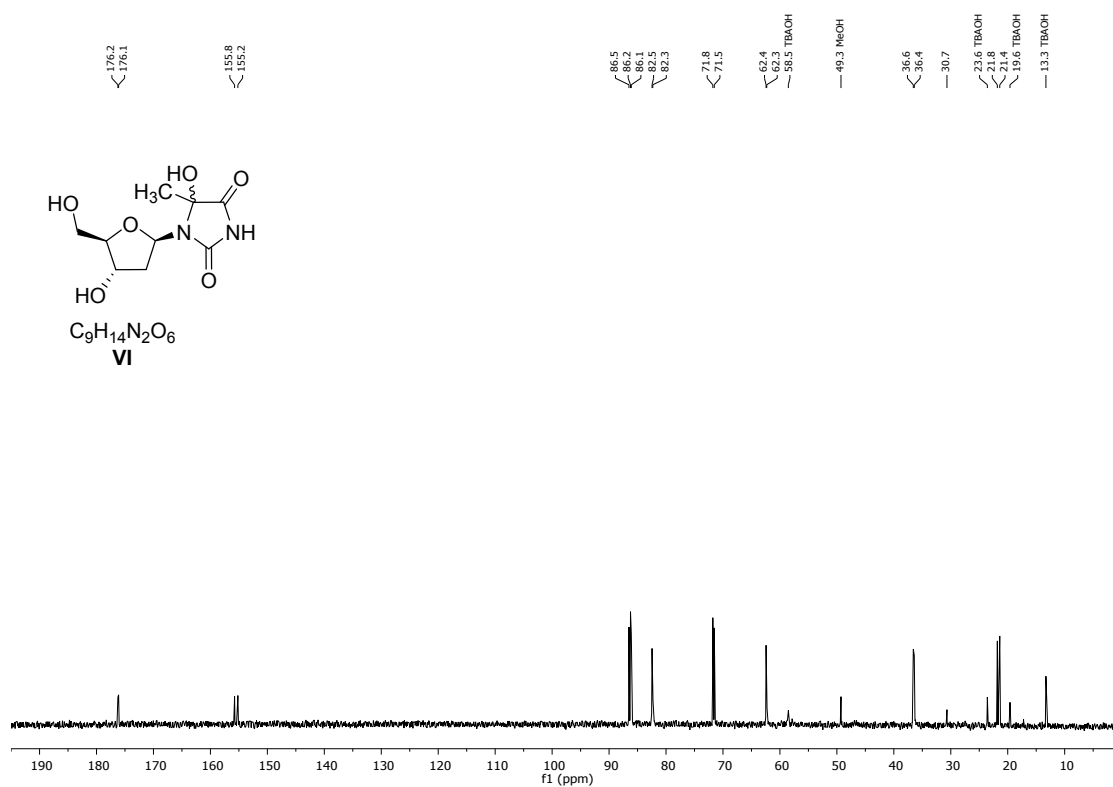

Figure S30:  $^{13}C$  NMR spectrum of **5b** (50 MHz,  $CDCl_3$ ).

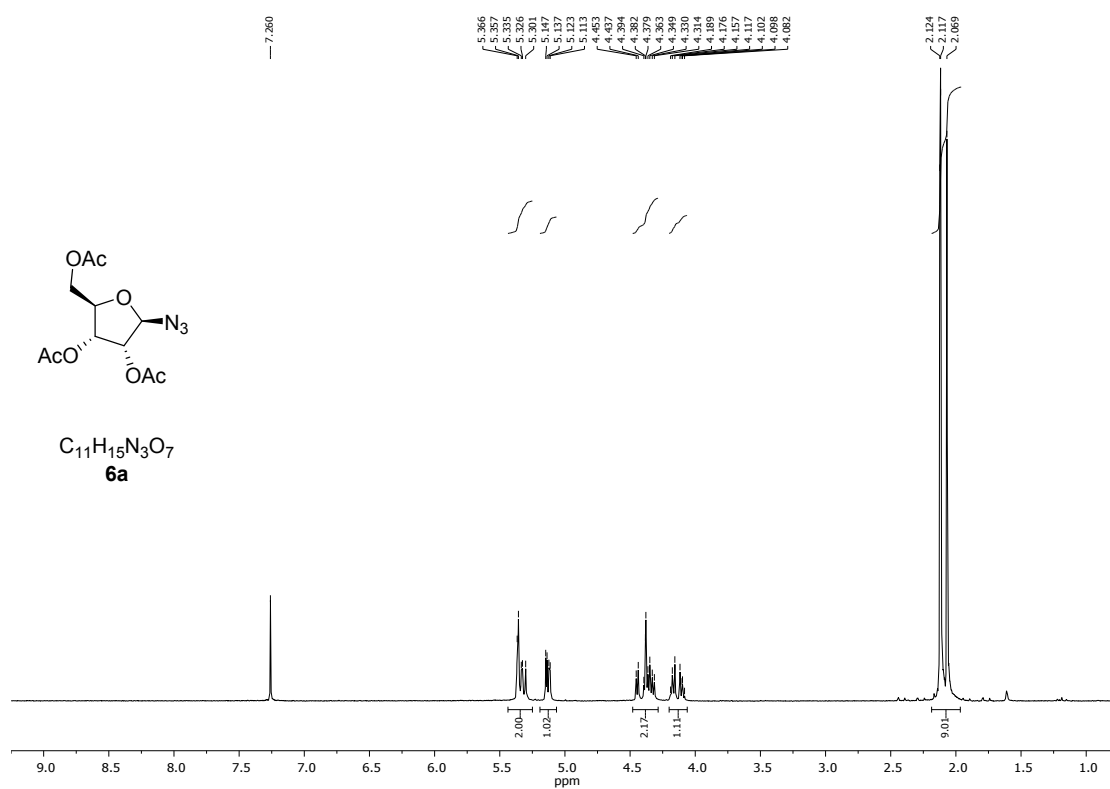

Figure S31:  $^1H$  NMR spectrum of **6a** (200 MHz,  $CDCl_3$ ).

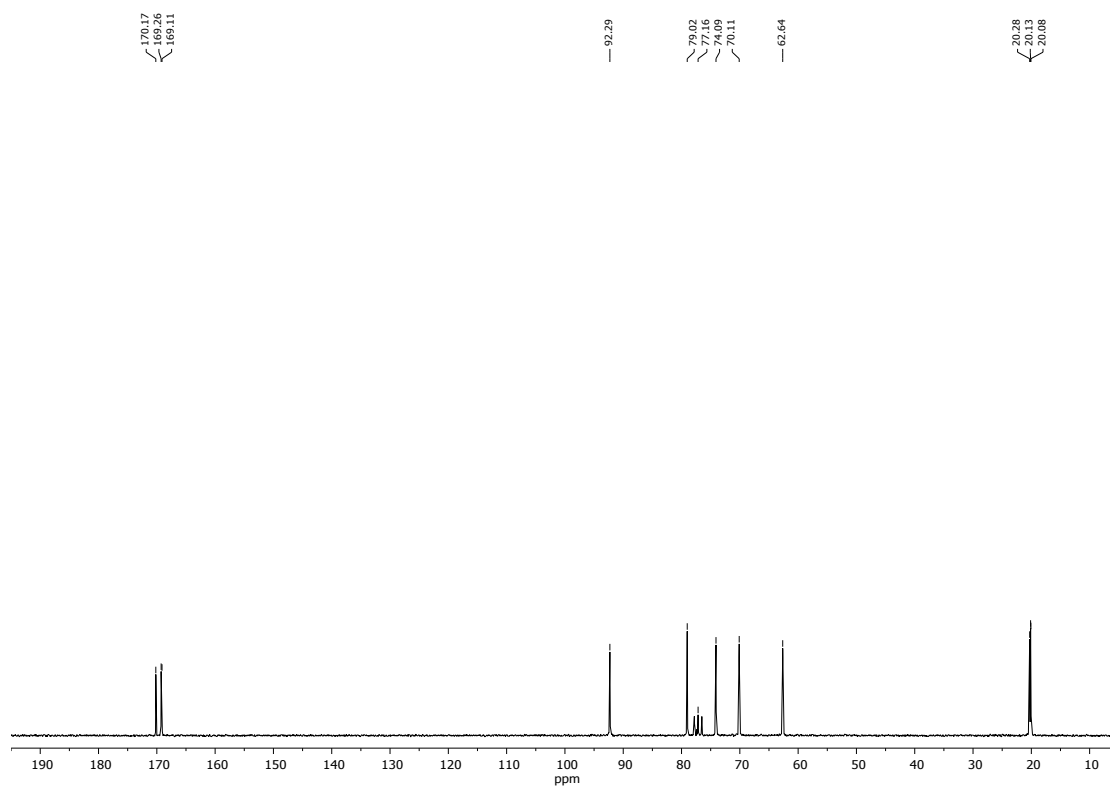

Figure S32:  $^{13}C$  NMR spectrum of **6a** (50 MHz,  $CDCl_3$ ).

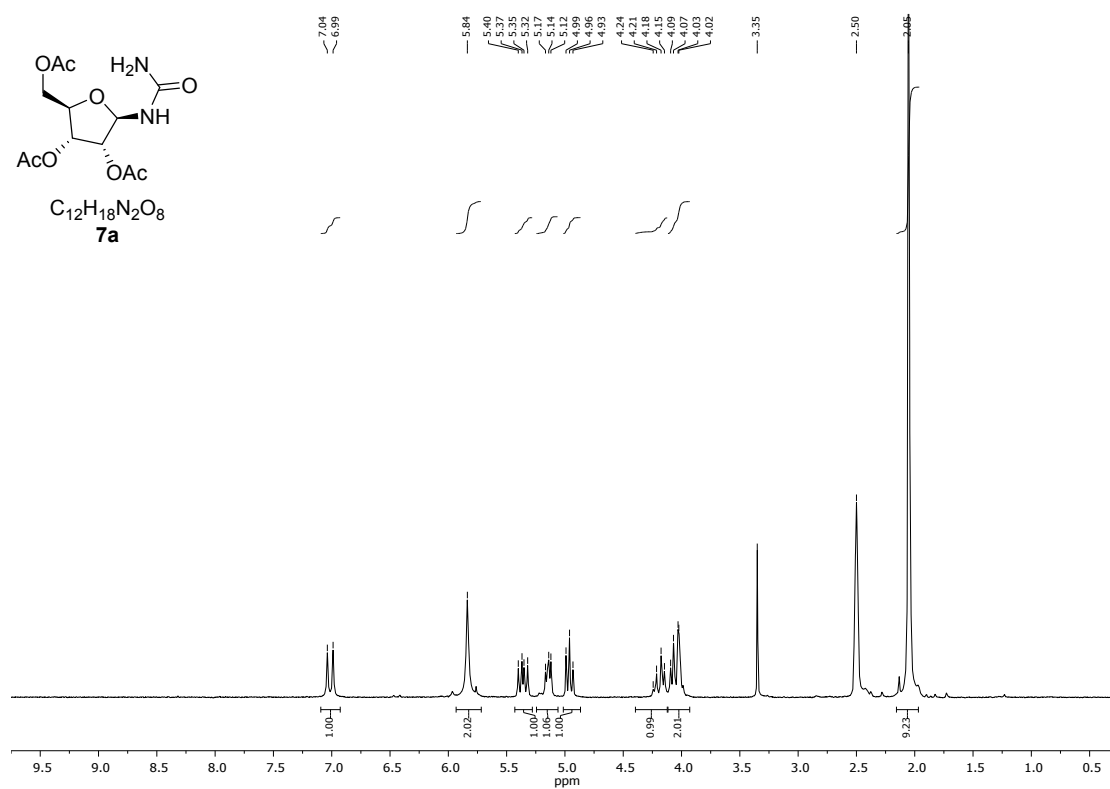

Figure S33:  $^1H$  NMR spectrum of **7a** (200 MHz, DMSO- $d_6$ ).

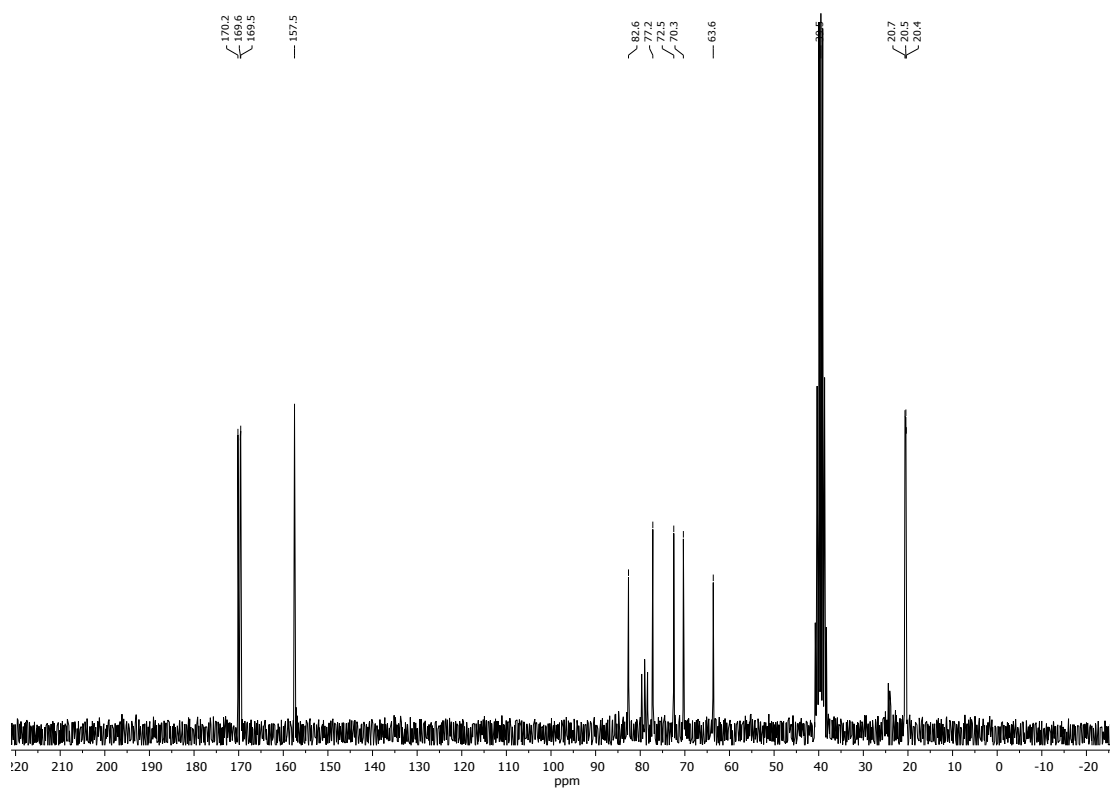

Figure S34:  $^{13}C$  NMR spectrum of **7a** (50 MHz, DMSO- $d_6$ ).

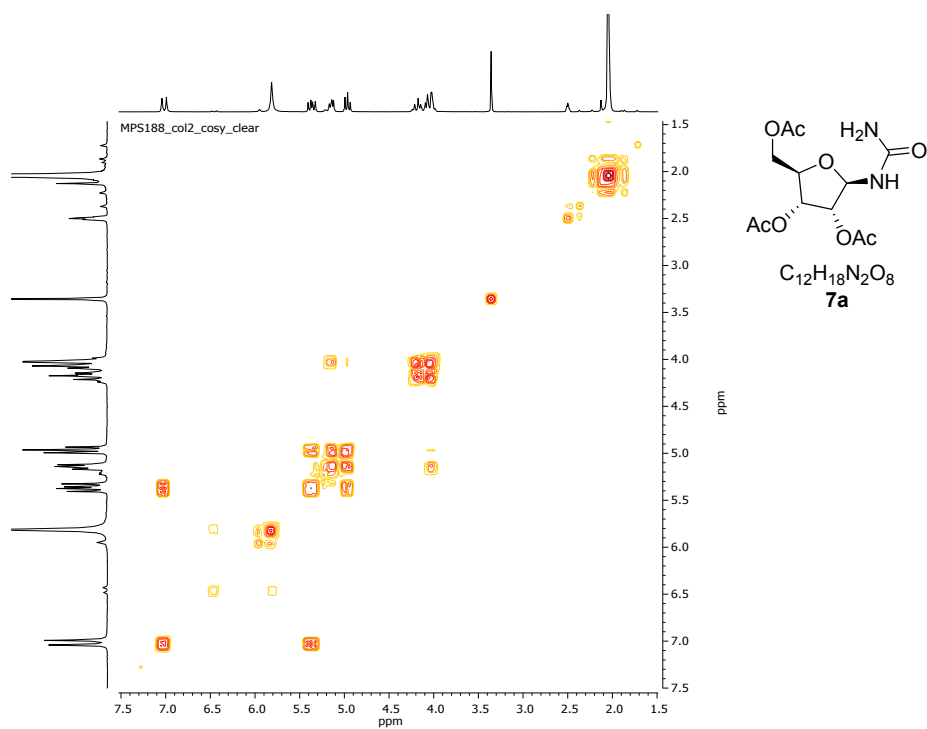

Figure S35: 2D COSY spectrum of **7a** (200 MHz, DMSO-d<sub>6</sub>).

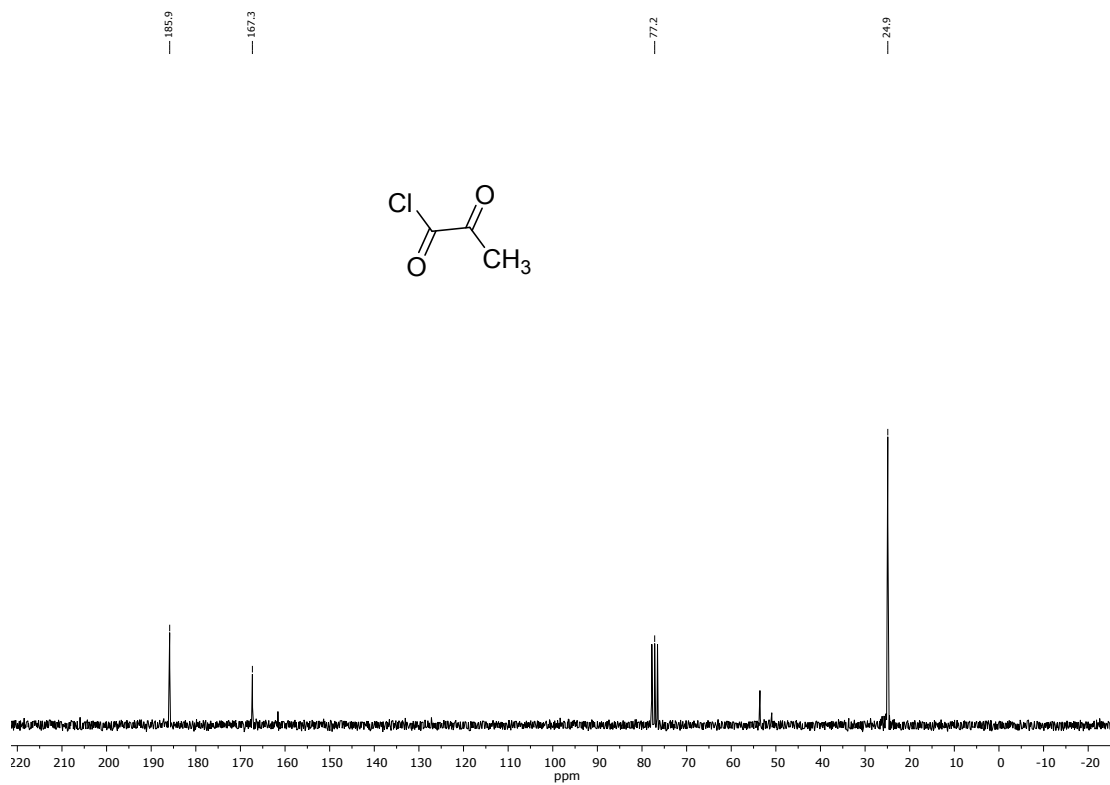

Figure S36: <sup>13</sup>C NMR spectrum of pyruvoyl chloride (50 MHz, CDCl<sub>3</sub>).

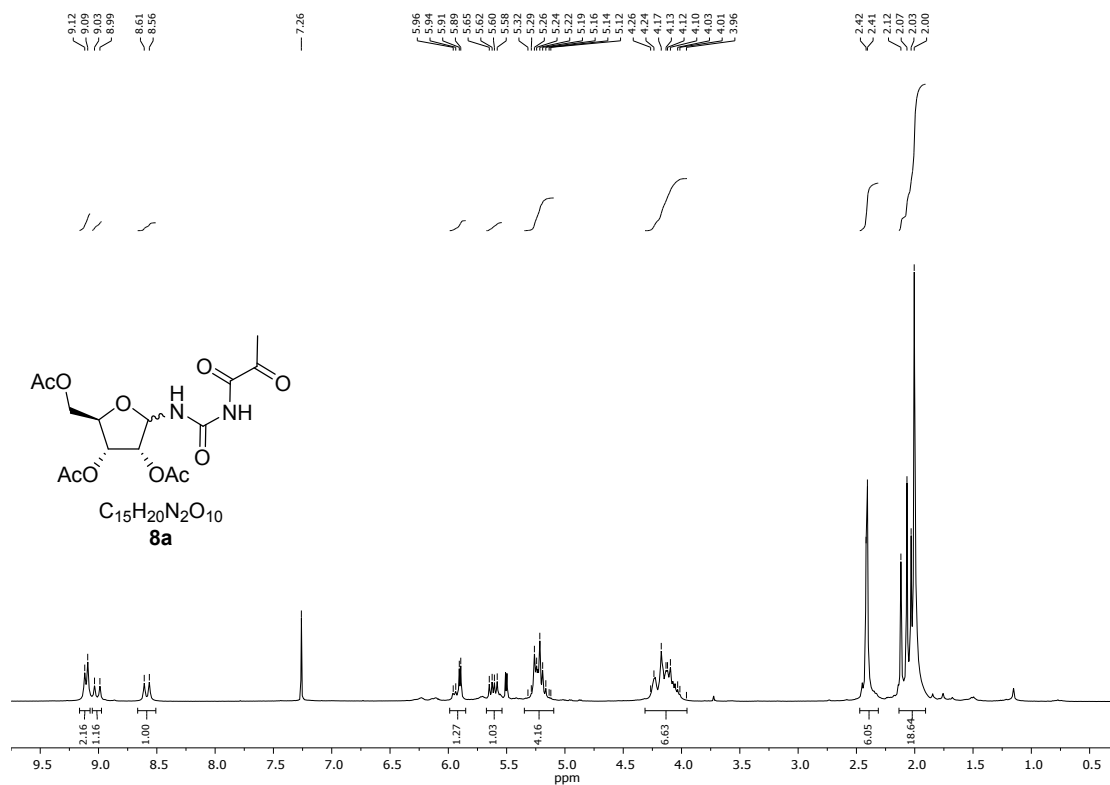

Figure S37:  $^1H$  NMR spectrum of **8a** (200 MHz,  $CDCl_3$ ).

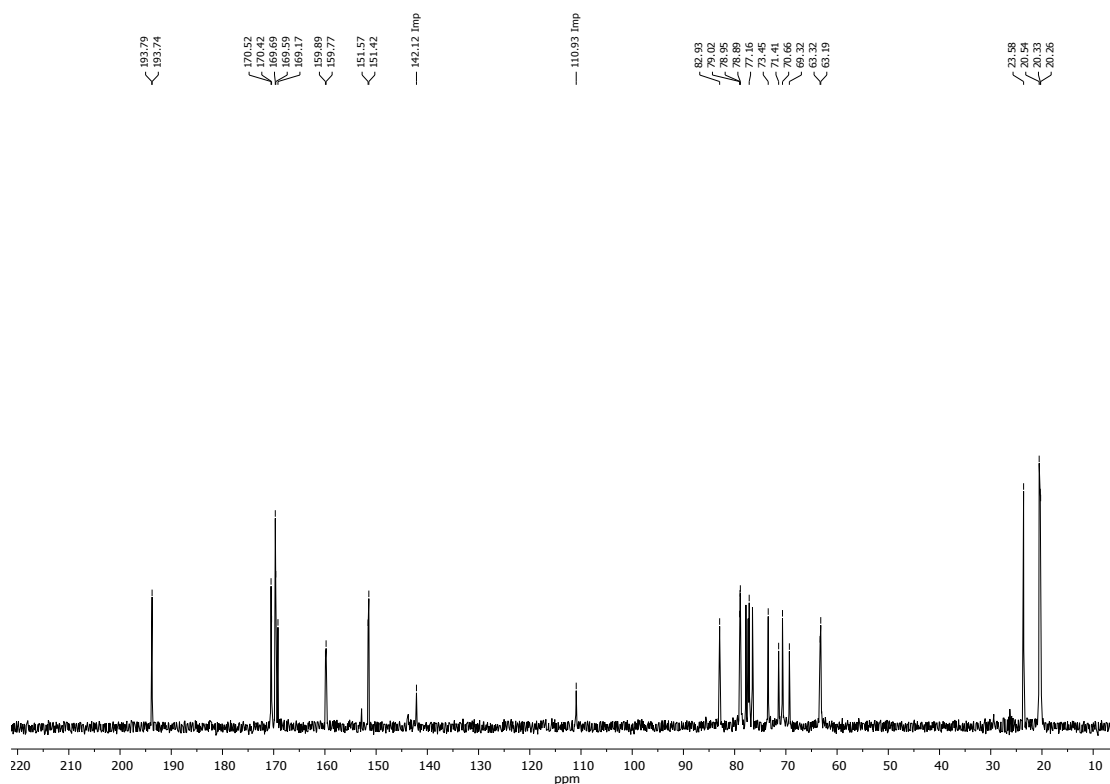

Figure S38:  $^{13}C$  NMR spectrum of **8a** (50 MHz,  $CDCl_3$ ).

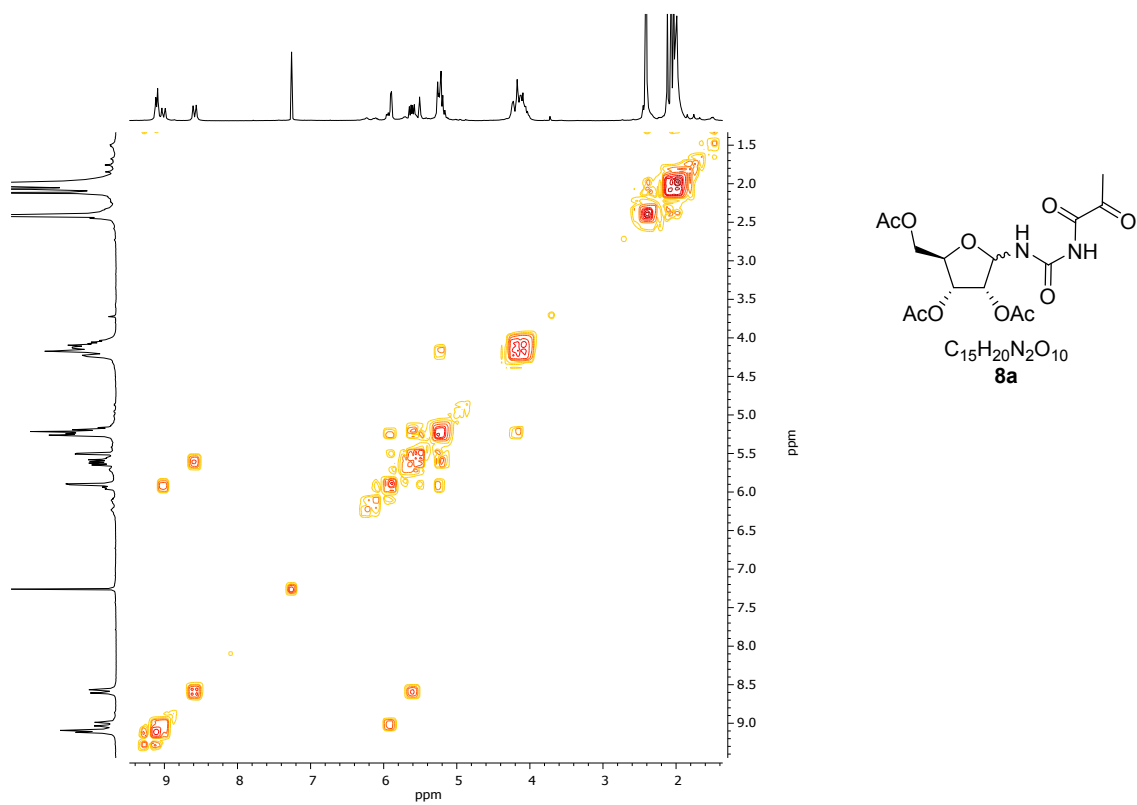

Figure S39: 2D-COSY spectrum of **8a** (200 MHz,  $CDCl_3$ ).

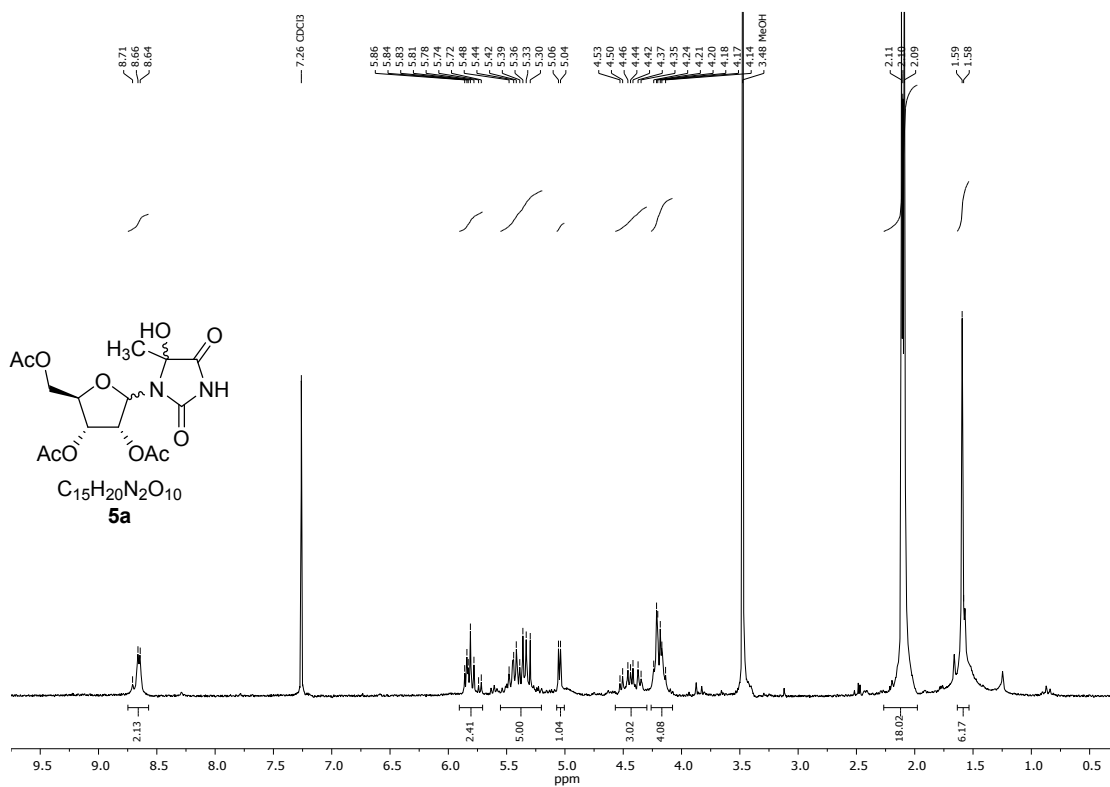

Figure S40:  $^1H$  NMR spectrum of **5a** (50 MHz,  $CDCl_3$ ).

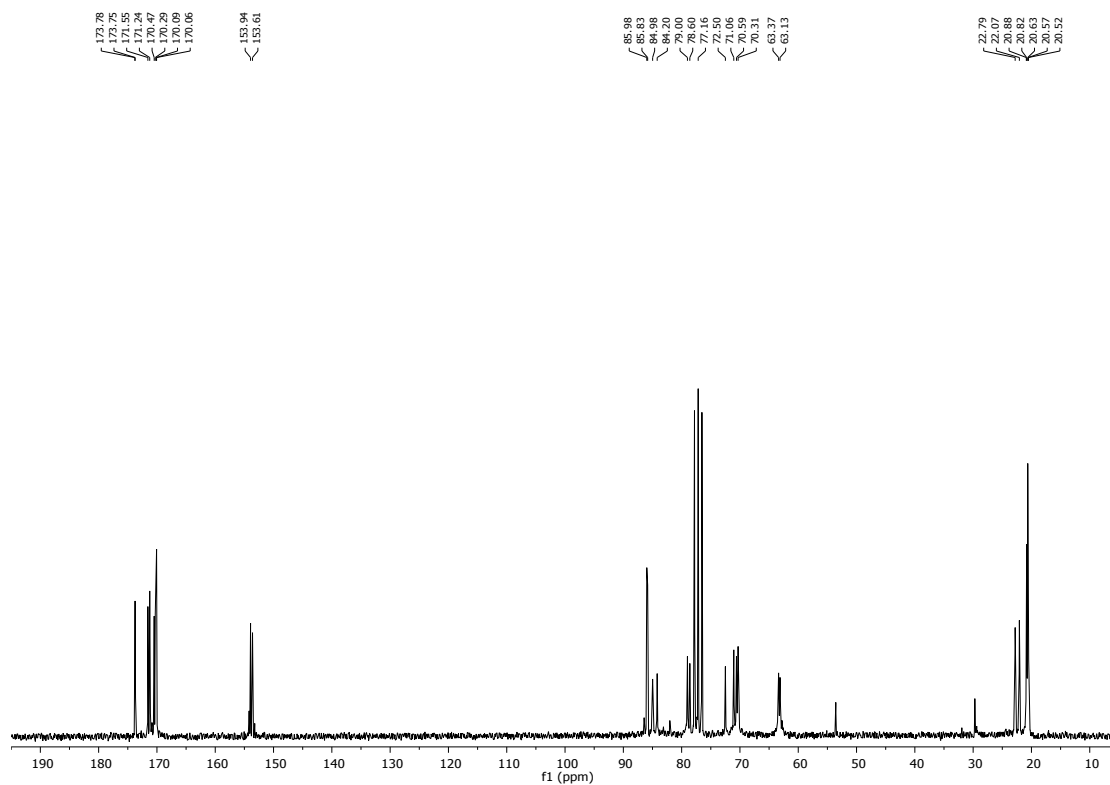

Figure S41:  $^{13}C$  NMR spectrum of **5a** (50 MHz,  $CDCl_3$ ).

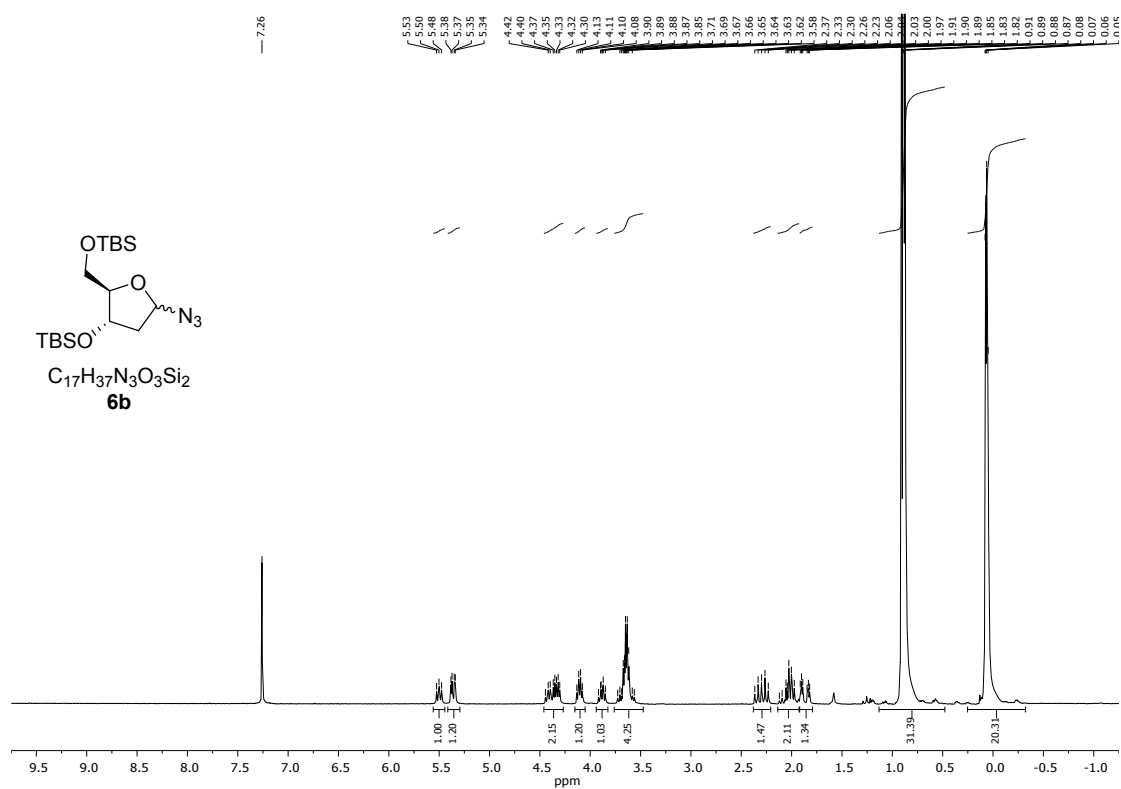

Figure S42:  $^1\text{H}$  NMR spectrum of **6b** (200 MHz,  $\text{CDCl}_3$ ).

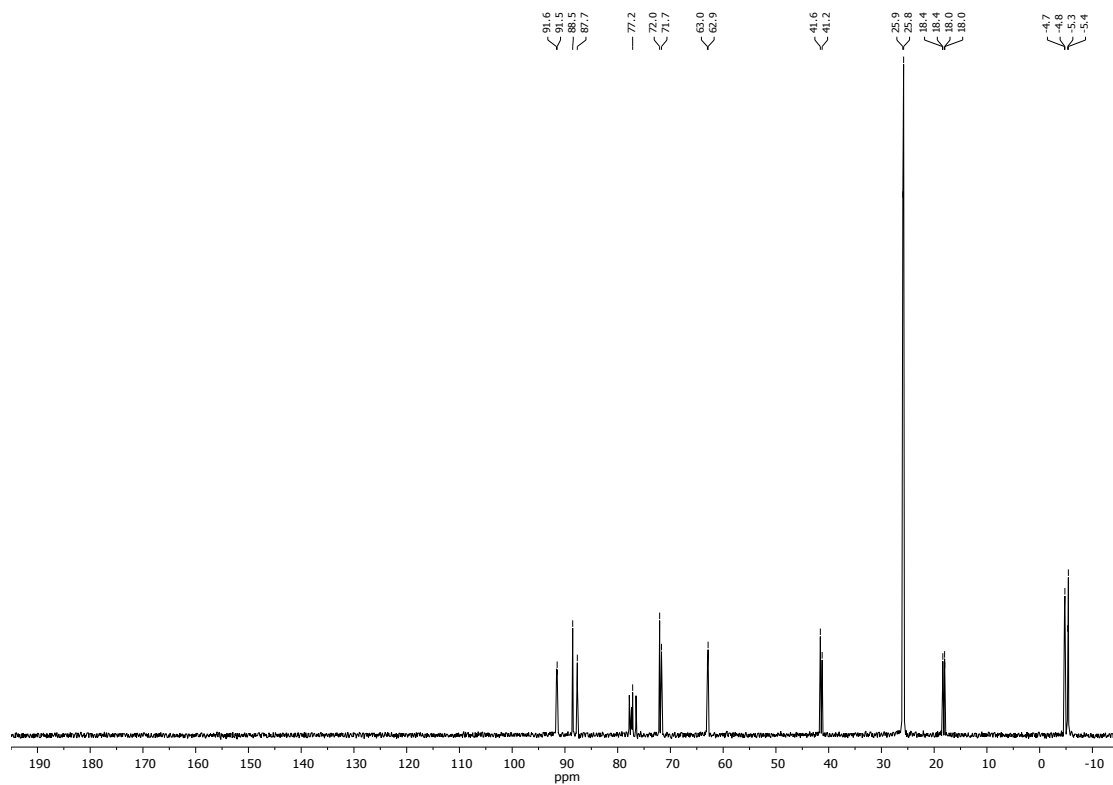

Figure S43:  $^{13}\text{C}$  NMR spectrum of **6b** (50 MHz,  $\text{CDCl}_3$ ).



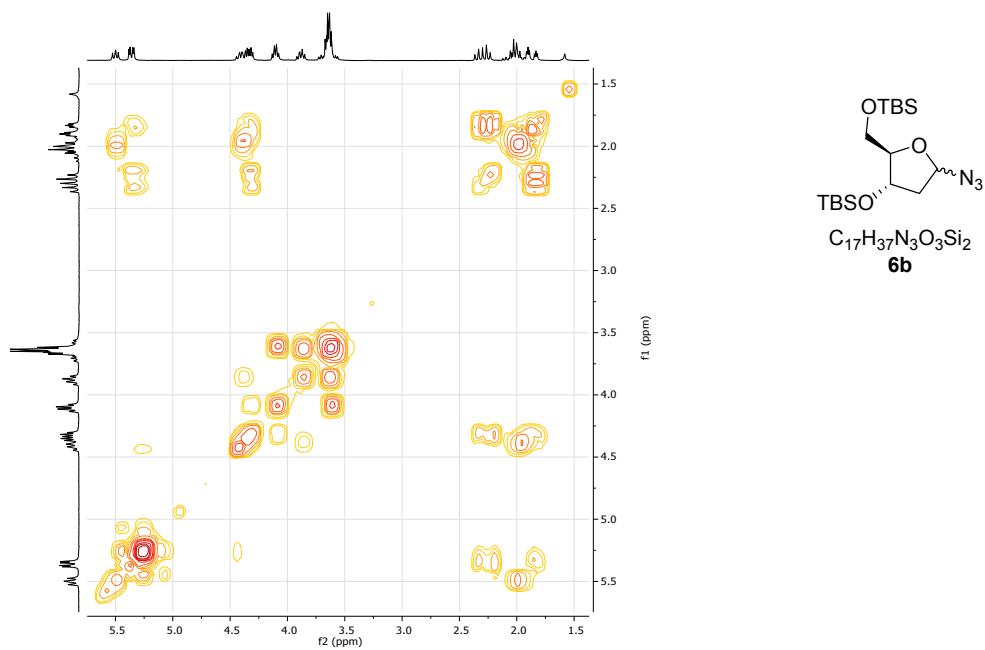

Figure S44: 2D-COSY spectrum of **6b** (200 MHz,  $CDCl_3$ ).

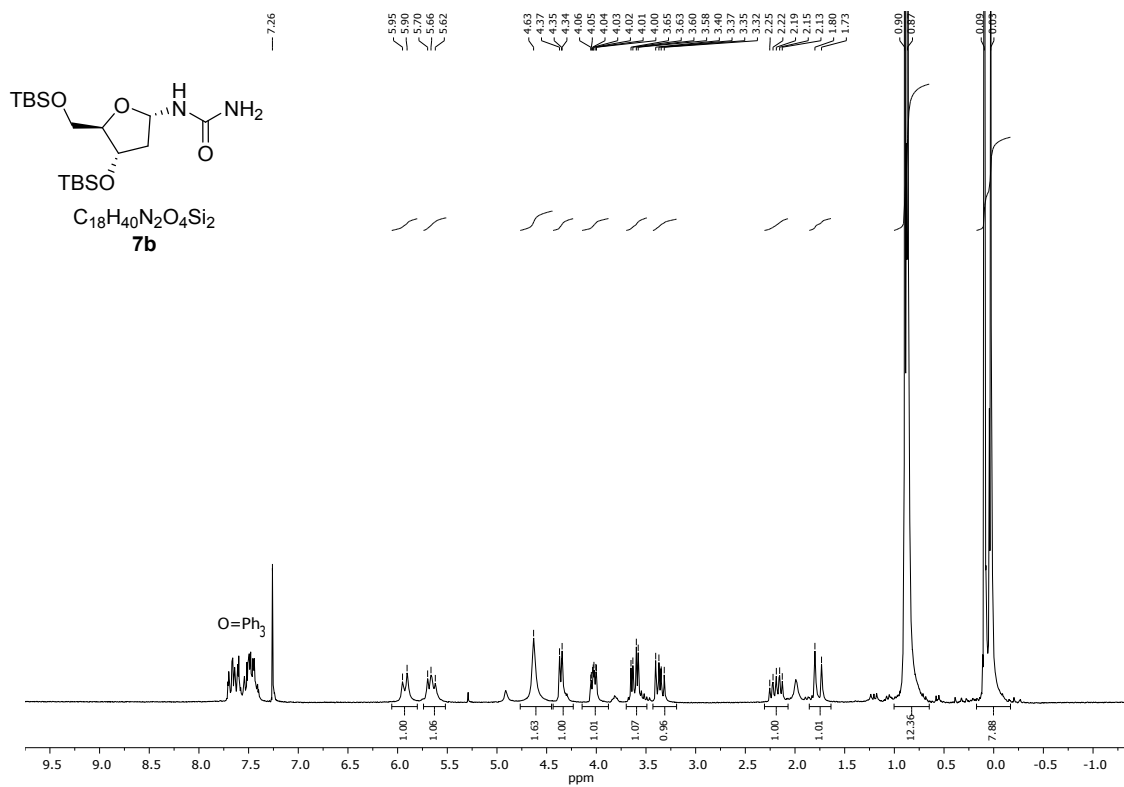

Figure S45:  $^1\text{H}$  NMR spectrum of  $\alpha$ -anomer of **7b** (200 MHz,  $\text{CDCl}_3$ ).

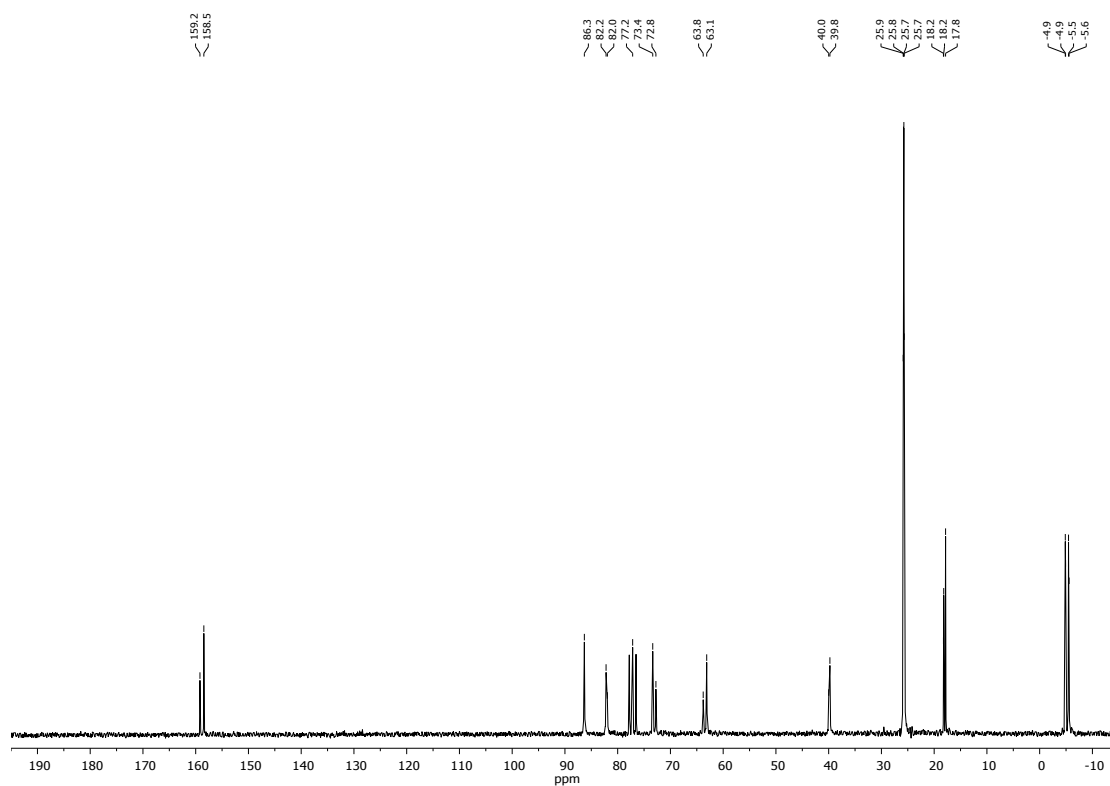

Figure S46:  $^{13}\text{C}$  NMR spectrum of  $\alpha$ -anomer of **7b** (50 MHz,  $\text{CDCl}_3$ ).

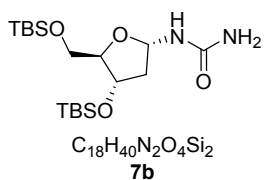

| Parameter                                  | Value                                                                            |
|--------------------------------------------|----------------------------------------------------------------------------------|
| 1 Title                                    |                                                                                  |
| 2 Comment                                  | Gimisis/ 14, NOESY, CDCl <sub>3</sub> , 295, MPS187_col28, 4/ 6/ 13 (avance 500) |
| 3 Origin                                   | UXNMR, Bruker Analytische Messtechnik GmbH                                       |
| 4 Owner                                    | root                                                                             |
| 5 Site                                     |                                                                                  |
| 6 Instrument                               | spect                                                                            |
| 7 Author                                   |                                                                                  |
| 8 Solvent                                  | MeOH                                                                             |
| 9 Temperature                              | 300.0                                                                            |
| 10 Pulse Sequence                          | noesytp                                                                          |
| 11 Experiment                              | NOESY                                                                            |
| 12 Probe                                   | 5 mm BBI 1H-BB-D Z-GRD Z8107/0186                                                |
| 13 Number of Scans                         | 8                                                                                |
| 14 Receiver Gain                           | 100.0                                                                            |
| 15 Relaxation Delay                        | 1.0000                                                                           |
| 16 Pulse Width                             | 9.6000                                                                           |
| 17 Presaturation Frequency                 |                                                                                  |
| 18 Acquisition Time                        | 0.1278                                                                           |
| 19 Acquisition Date                        | 2013-06-04T17:53:42                                                              |
| 20 Modification Date                       | 2013-06-04T18:46:46                                                              |
| 21 Class                                   |                                                                                  |
| 22 Spectrometer Frequency (500.13, 500.13) |                                                                                  |
| 23 Spectral Width (4006.4, 4006.4)         |                                                                                  |
| 24 Lowest Frequency (-602.8, -602.8)       |                                                                                  |
| 25 Nucleus (1H, 1H)                        |                                                                                  |
| 26 Acquired Size (512, 256)                |                                                                                  |
| 27 Spectral Size (512, 512)                |                                                                                  |

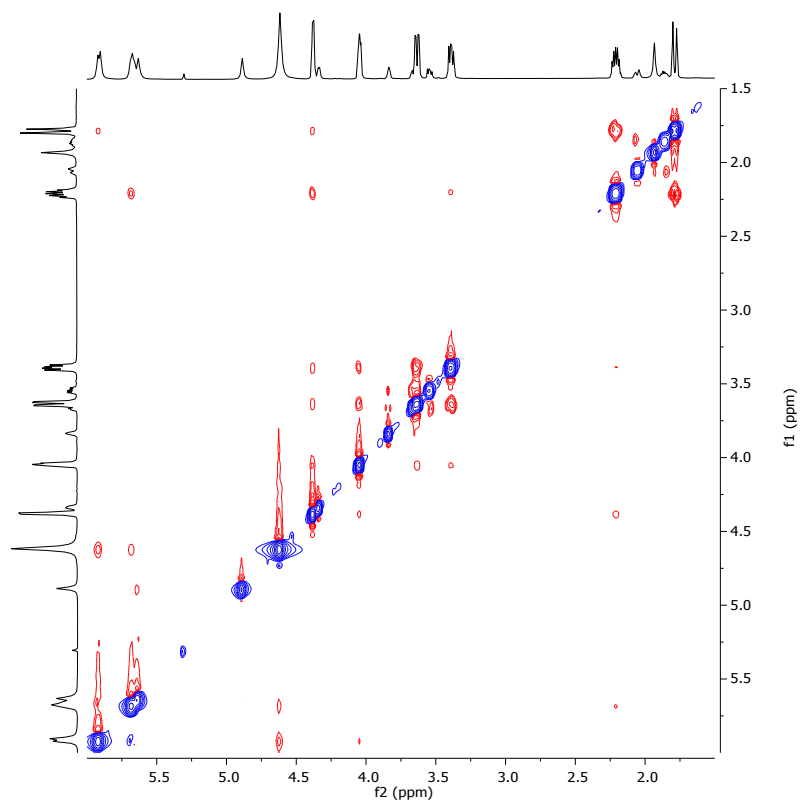

Figure S47: 2D-NOESY spectrum of  $\alpha$ -anomer of **7b** (500 MHz, CDCl<sub>3</sub>).

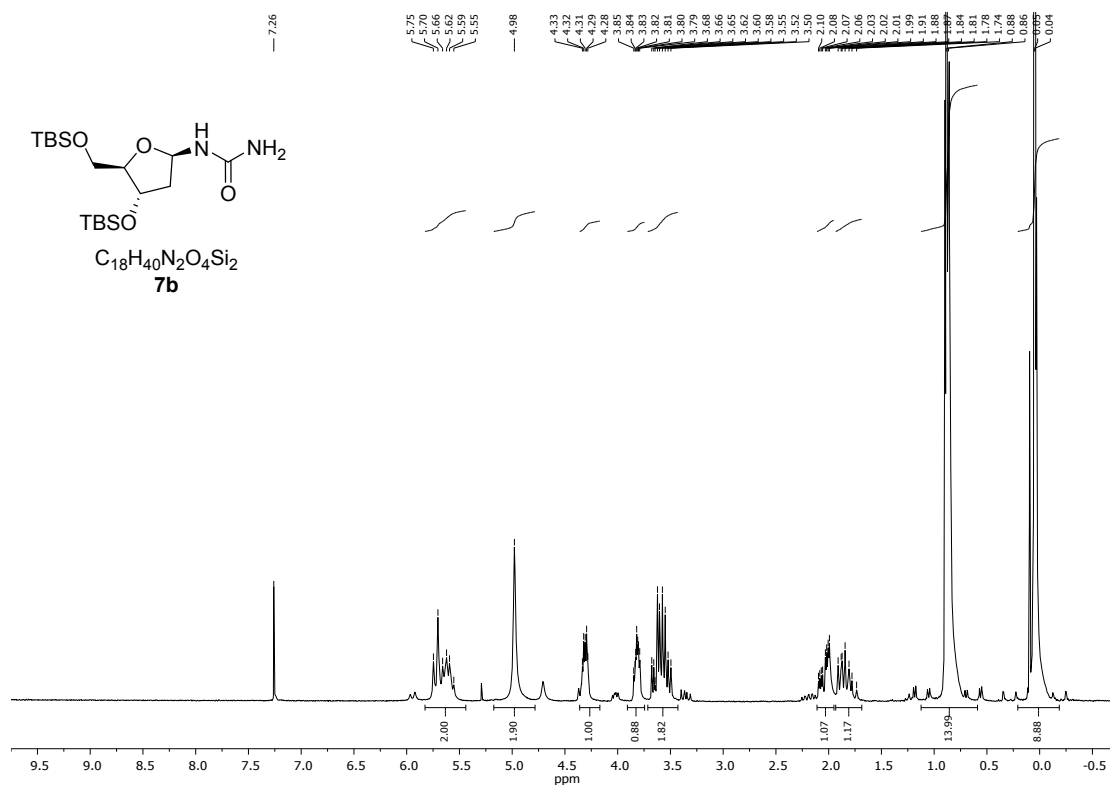

Figure S48:  $^1\text{H}$  NMR spectrum of  $\beta$ -anomer of **7b** (200 MHz,  $\text{CDCl}_3$ ).

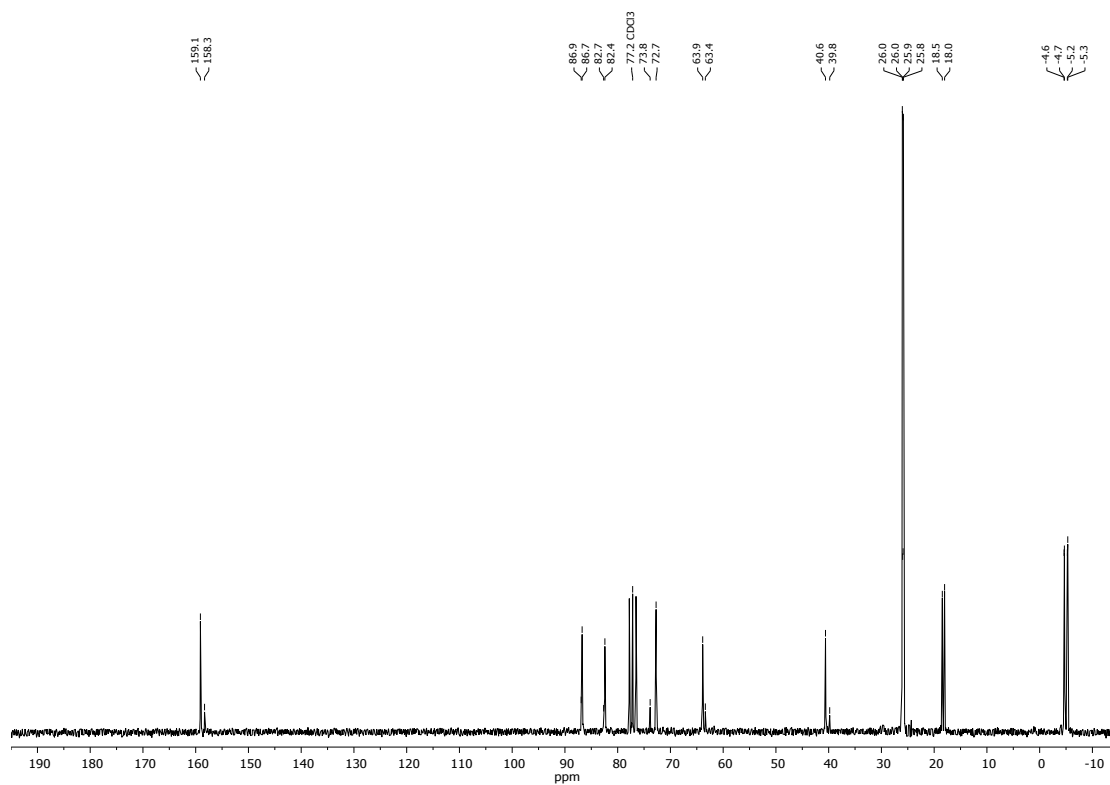

Figure S49:  $^{13}\text{C}$  NMR spectrum of  $\beta$ -anomer of **7b** (50 MHz,  $\text{CDCl}_3$ ).

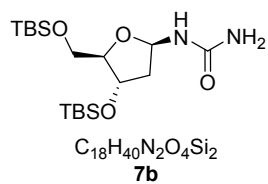

| Parameter                  | Value                                                                               |
|----------------------------|-------------------------------------------------------------------------------------|
| 1 Title                    |                                                                                     |
| 2 Comment                  | Gimisis/ 18, NOESY, CDCl <sub>3</sub> , 295, MPS187_col33_39, 7/ 6/ 13 (avance 500) |
| 3 Origin                   | UXNMR, Bruker Analytische Messtechnik GmbH                                          |
| 4 Owner                    | root                                                                                |
| 5 Site                     |                                                                                     |
| 6 Instrument               | spect                                                                               |
| 7 Author                   |                                                                                     |
| 8 Solvent                  | CDCl <sub>3</sub>                                                                   |
| 9 Temperature              | 300.0                                                                               |
| 10 Pulse Sequence          | noesytp                                                                             |
| 11 Experiment              | NOESY                                                                               |
| 12 Probe                   | 5 mm BBI 1H-BB-D Z-GRD 28107/ 0186                                                  |
| 13 Number of Scans         | 8                                                                                   |
| 14 Receiver Gain           | 100.0                                                                               |
| 15 Relaxation Delay        | 1.0000                                                                              |
| 16 Pulse Width             | 9.6000                                                                              |
| 17 Presaturation Frequency |                                                                                     |
| 18 Acquisition Time        | 0.0852                                                                              |
| 19 Acquisition Date        | 2013-06-07T15:40:11                                                                 |
| 20 Modification Date       | 2013-06-07T16:23:02                                                                 |
| 21 Class                   |                                                                                     |
| 22 Spectrometer Frequency  | (500.13, 500.13)                                                                    |
| 23 Spectral Width          | (6009.6, 6009.6)                                                                    |
| 24 Lowest Frequency        | (-1014.3, -1014.3)                                                                  |
| 25 Nucleus                 | (1H, 1H)                                                                            |
| 26 Acquired Size           | (512, 217)                                                                          |
| 27 Spectral Size           | (512, 512)                                                                          |

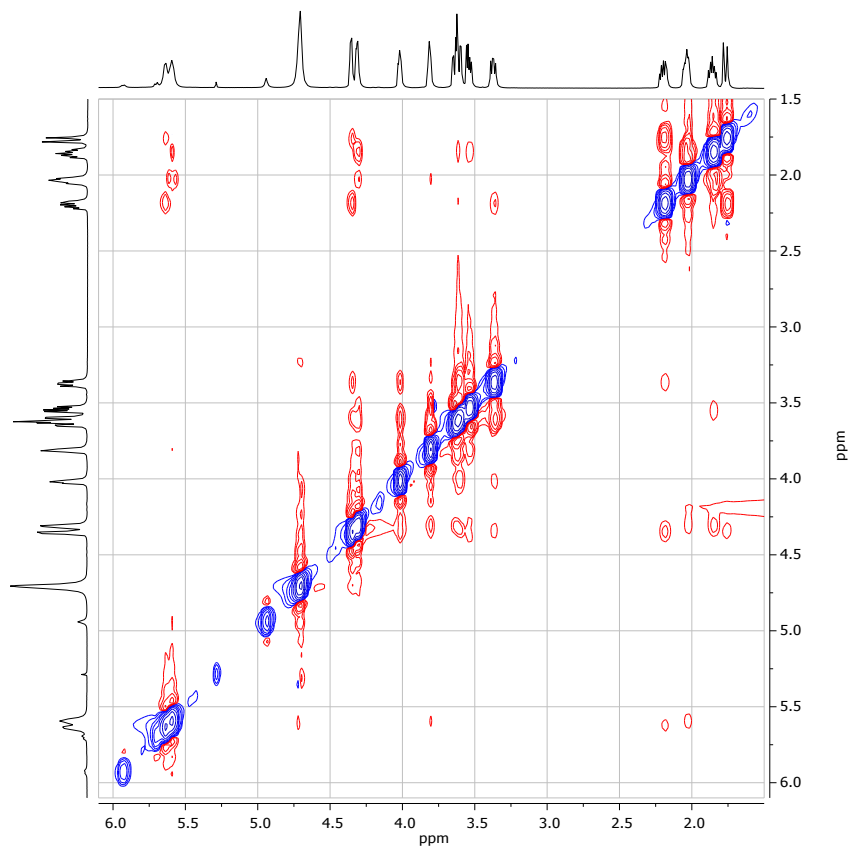

Figure S50: 2D-NOESY spectrum of  $\beta$ -anomer of **7b** (500 MHz, CDCl<sub>3</sub>).

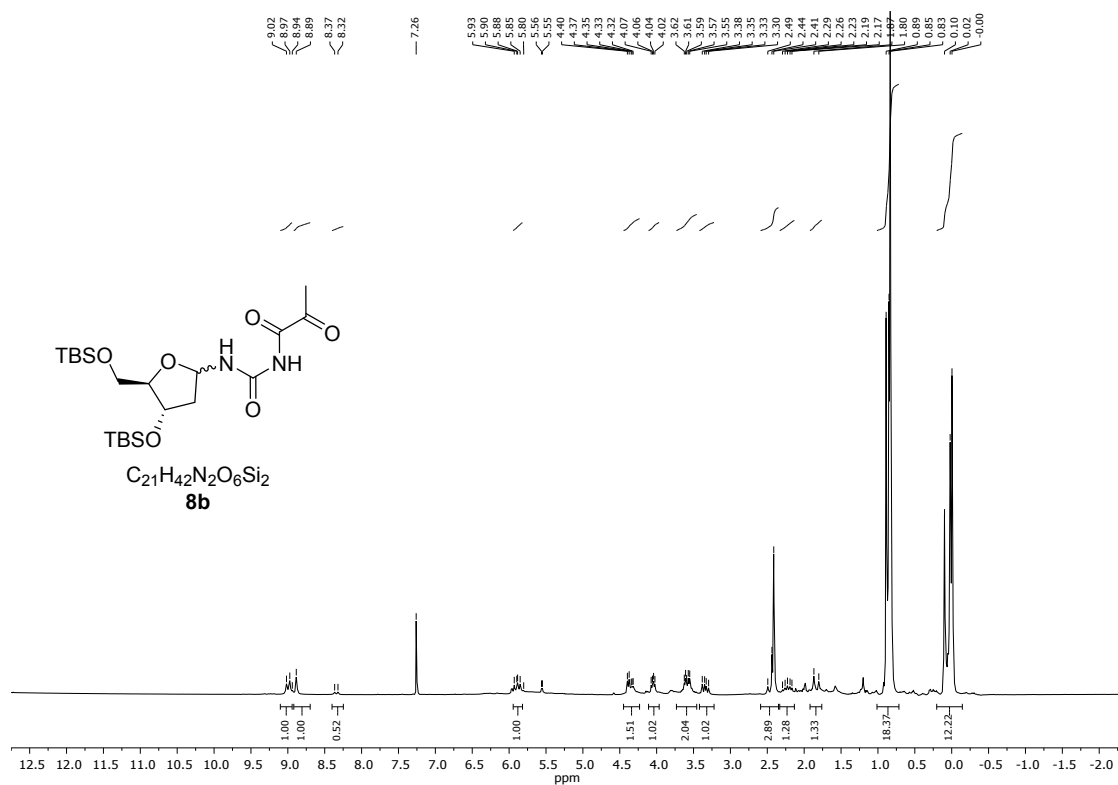

Figure S51:  $^1H$  NMR spectrum of **8b** (200 MHz,  $CDCl_3$ ).

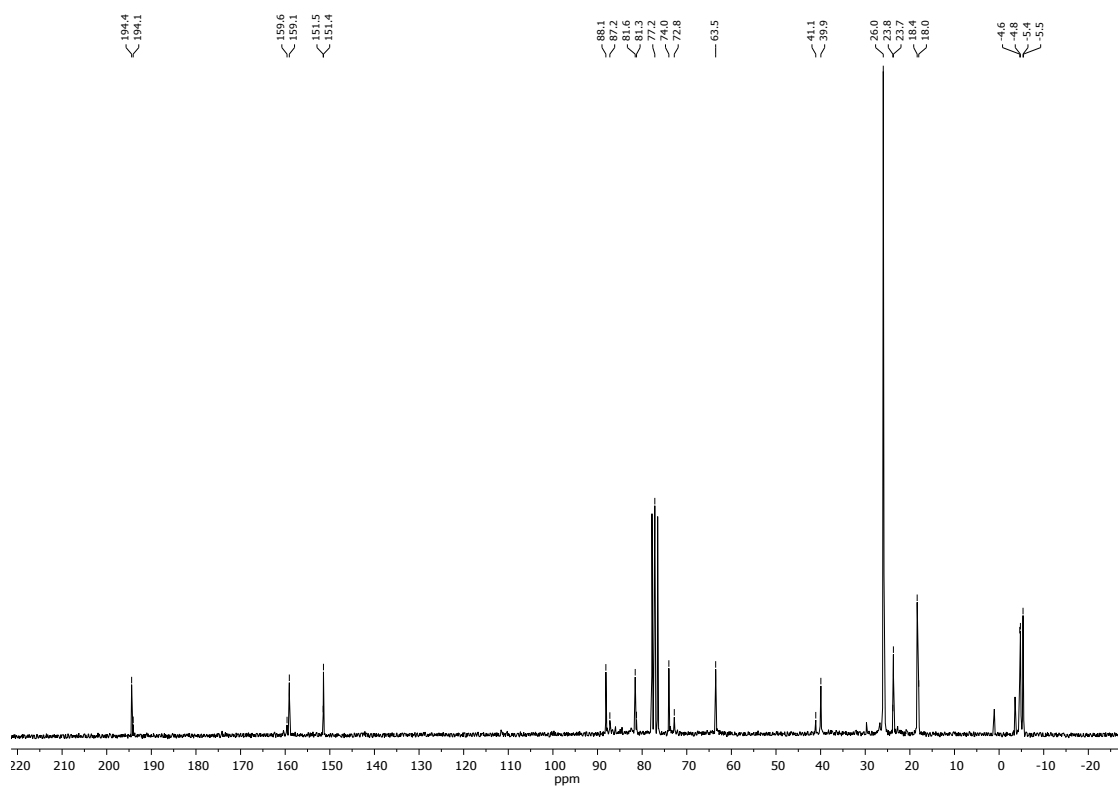

Figure S52:  $^{13}C$  NMR spectrum of **8b** (50 MHz,  $CDCl_3$ ).

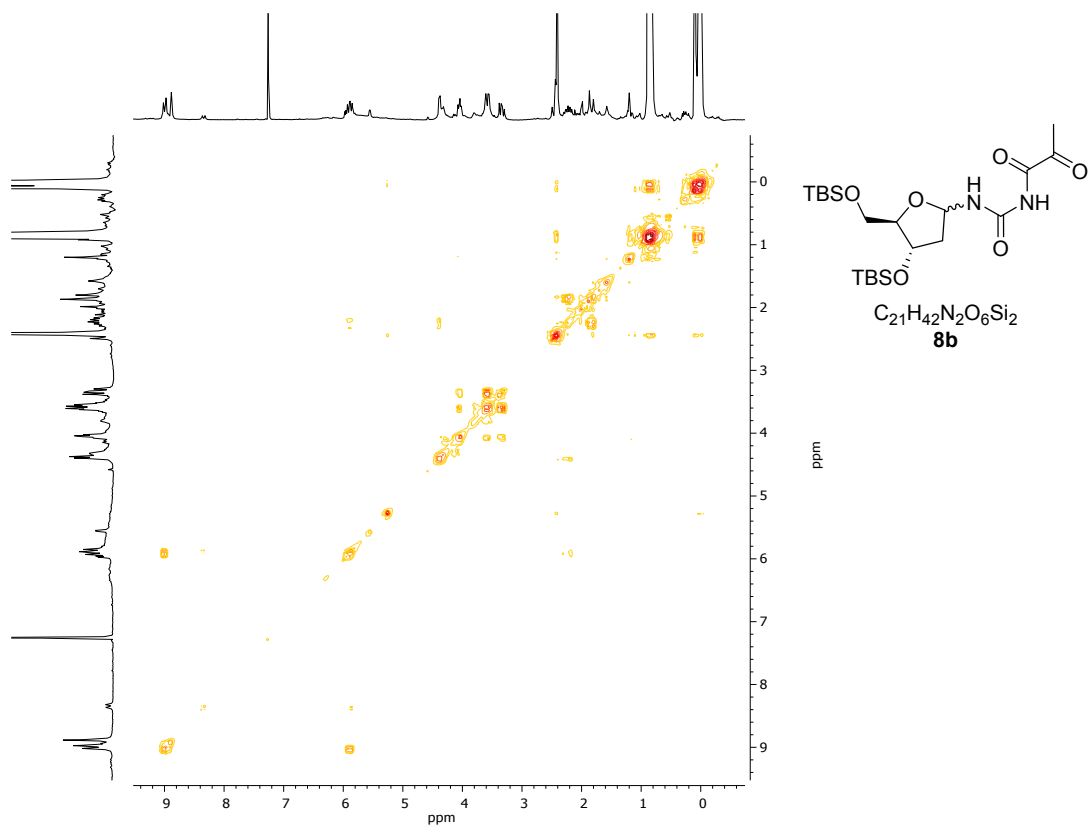

Figure S53: 2D-COSY spectrum of **8b** (200 MHz,  $CDCl_3$ ).

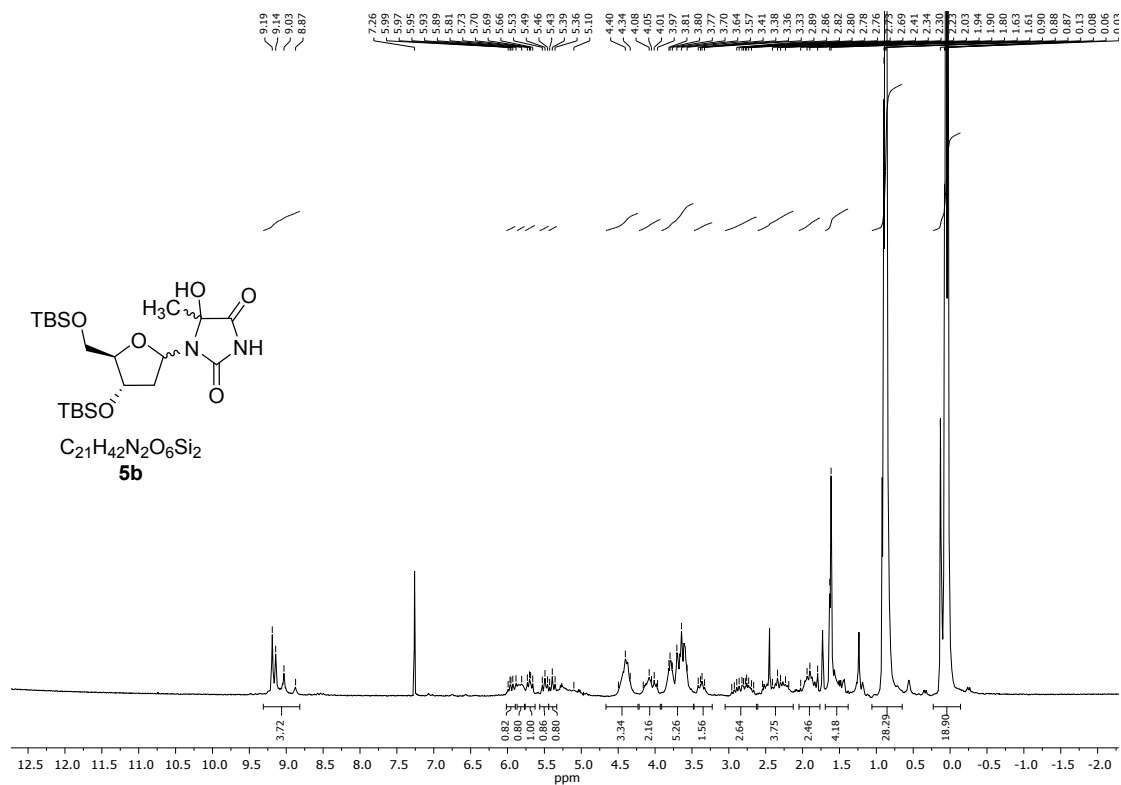

Figure S54:  $^1\text{H NMR}$  spectrum of **5b** (200 MHz,  $\text{CDCl}_3$ ).

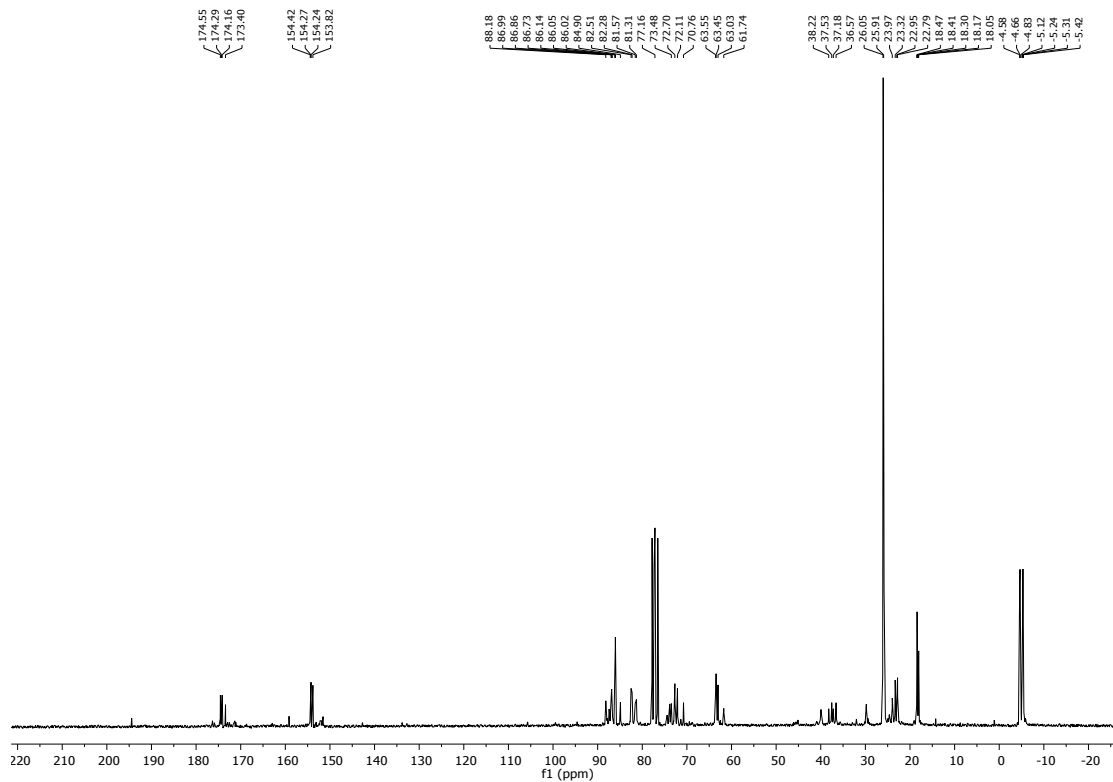

Figure S55:  $^{13}\text{C NMR}$  spectrum of **5b** (50 MHz,  $\text{CDCl}_3$ ).



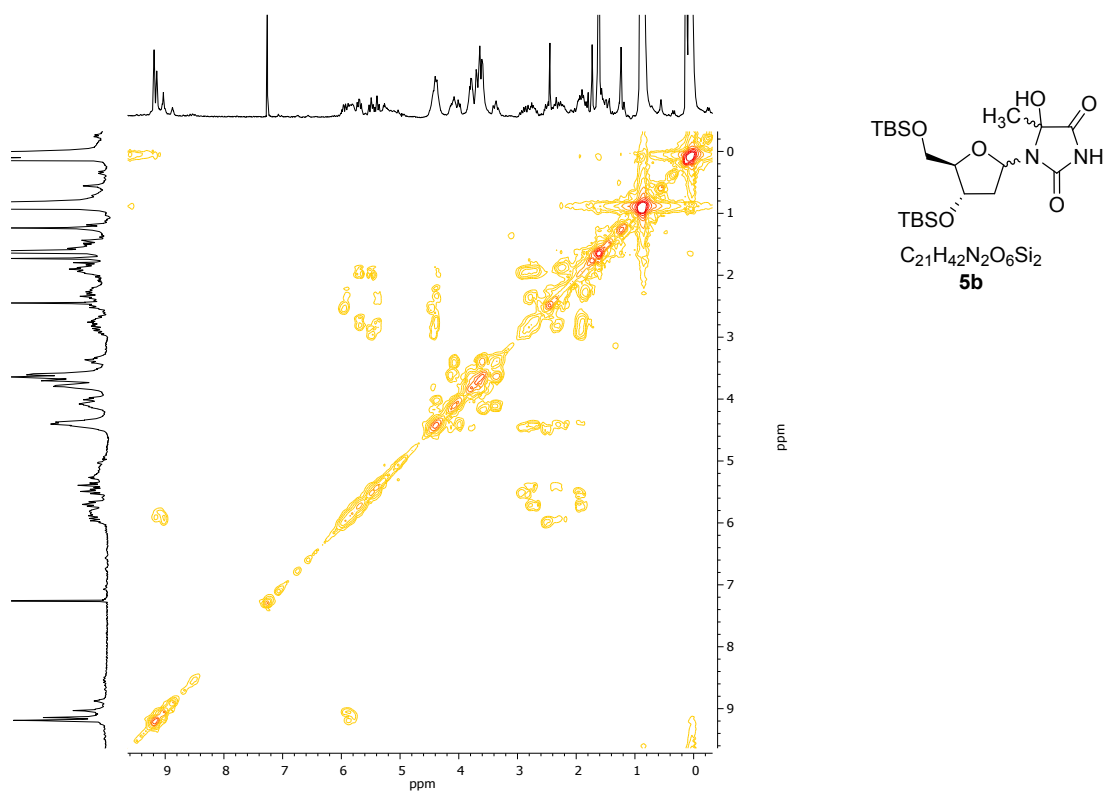

Figure S56: 2D-COSY spectrum of **5b** (200 MHz, CDCl<sub>3</sub>).

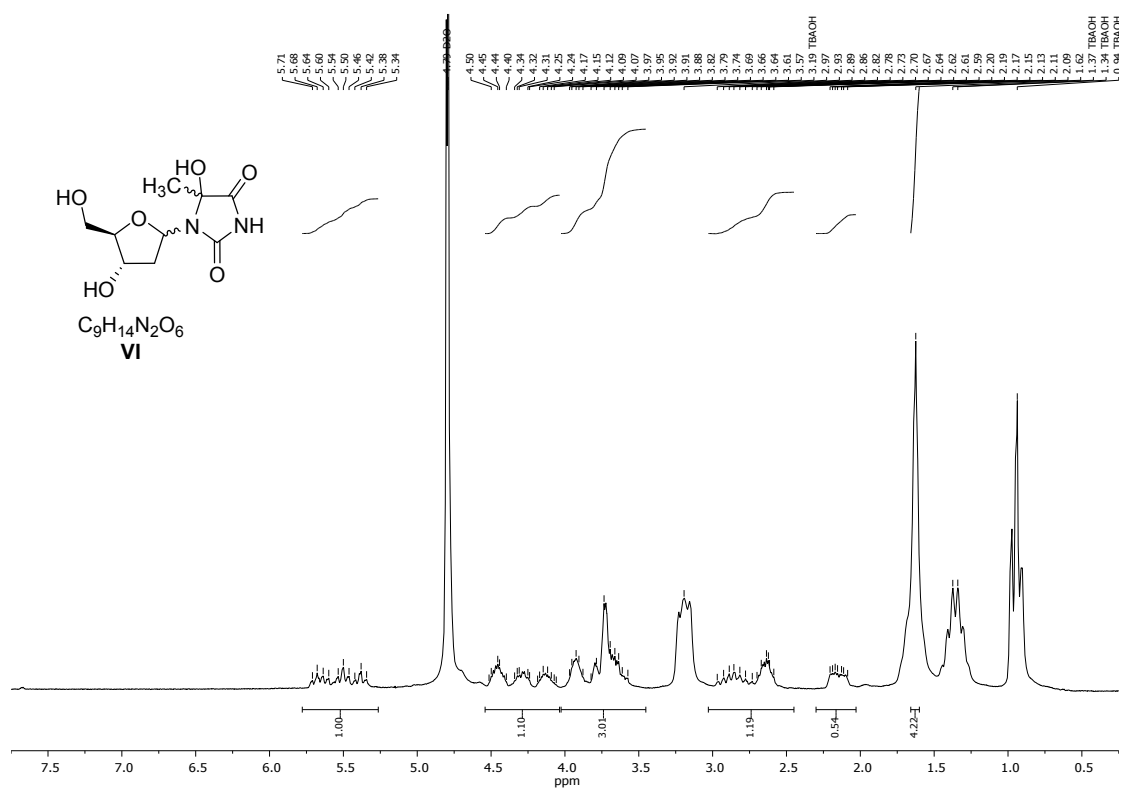

Figure S57:  $^1H$  NMR spectrum of VI (200 MHz,  $D_2O$ ).

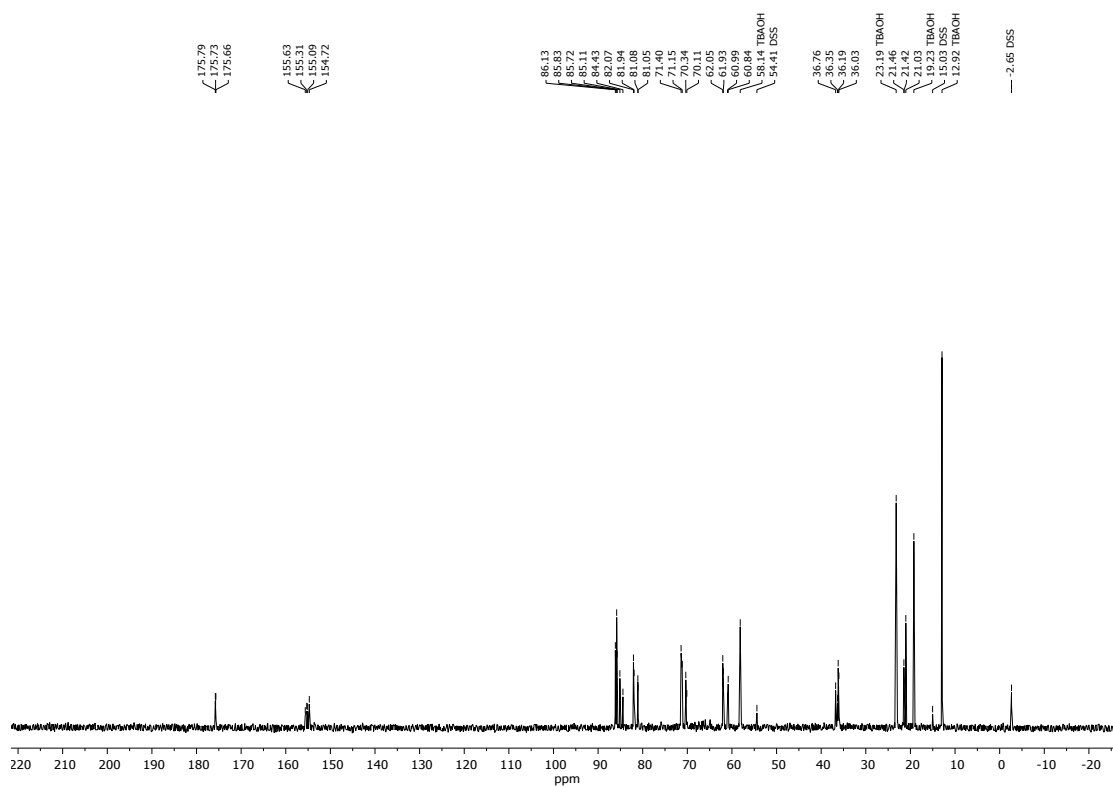

Figure S58:  $^{13}C$  NMR spectrum of VI (50 MHz,  $D_2O$ ).

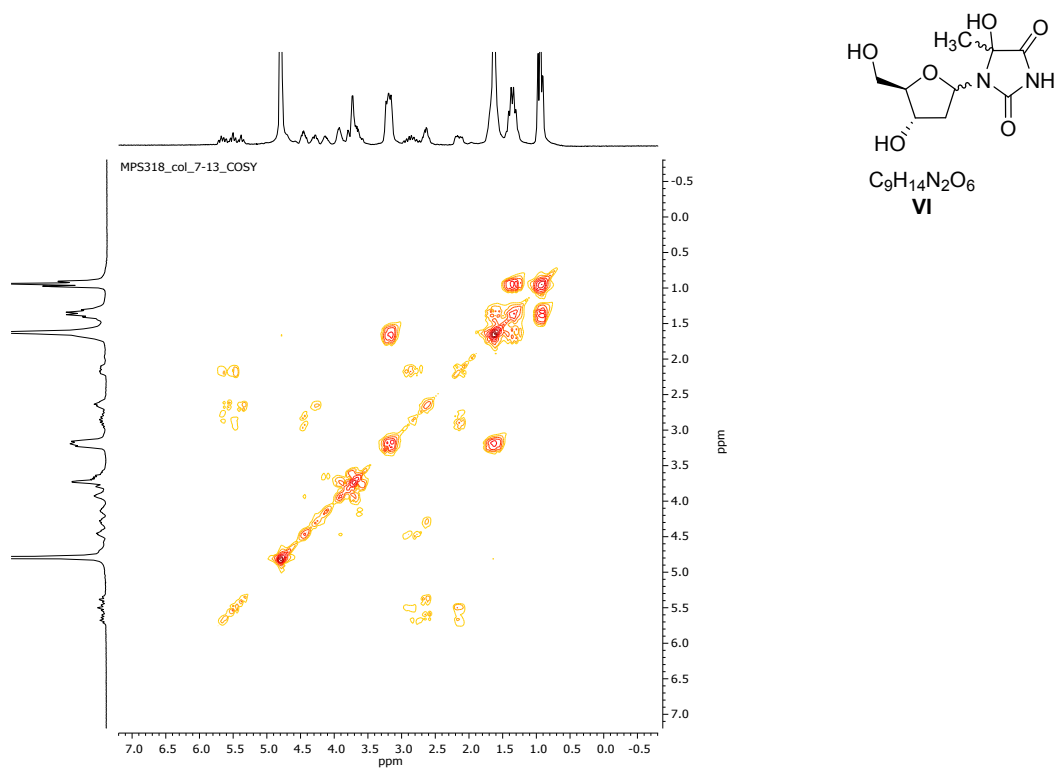

Figure S59: 2D-COSY spectrum of **VI** (200 MHz, D<sub>2</sub>O).

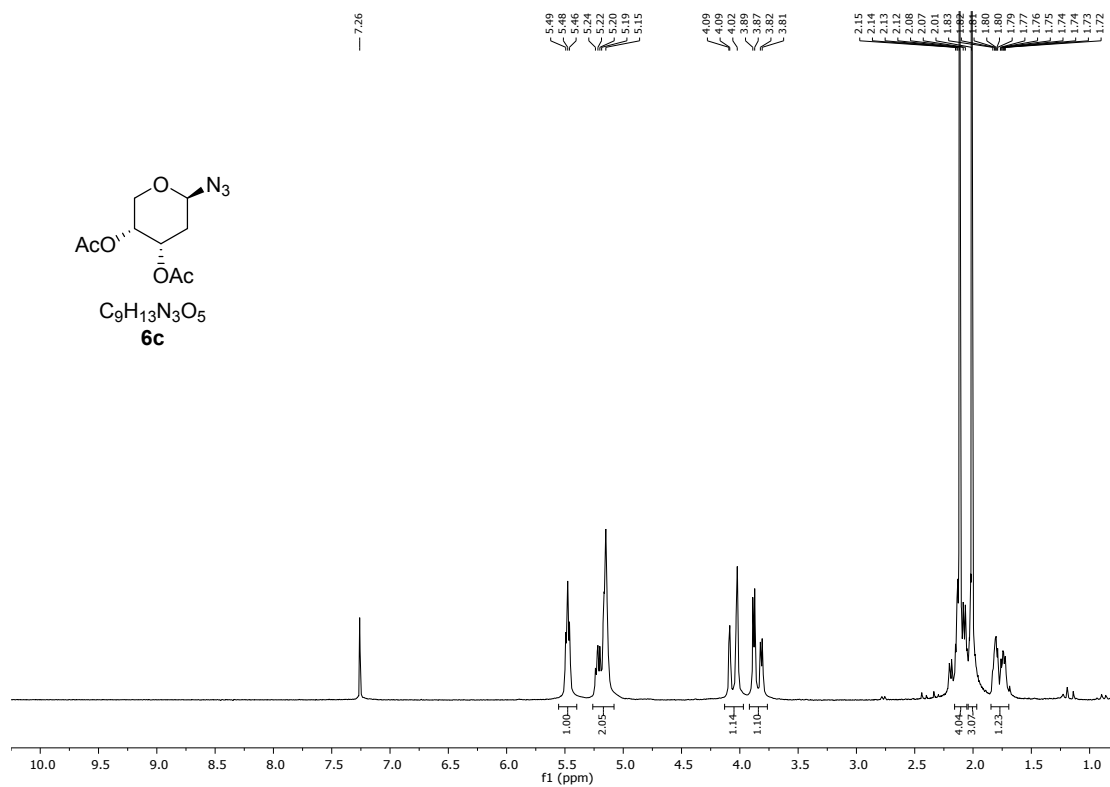

Figure S60:  $^1H$  NMR spectrum of **6c** (200 MHz,  $CDCl_3$ ).

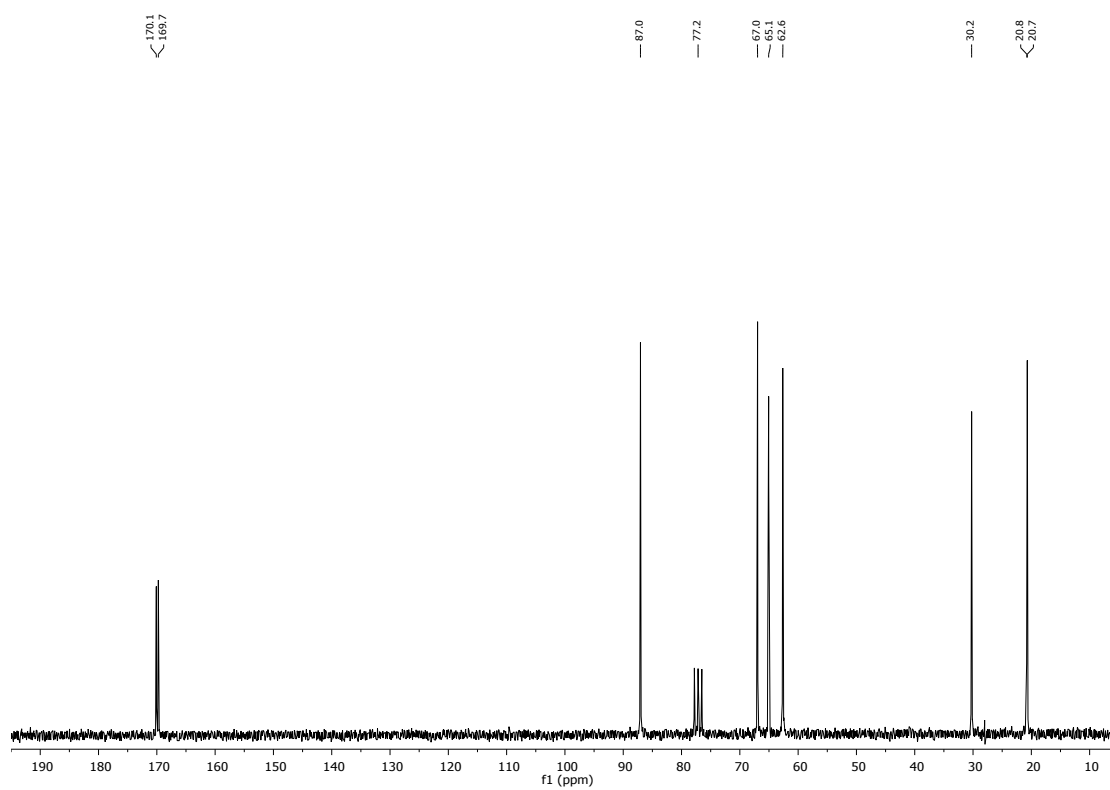

Figure S61:  $^{13}C$  NMR spectrum of **6c** (50 MHz,  $CDCl_3$ ).

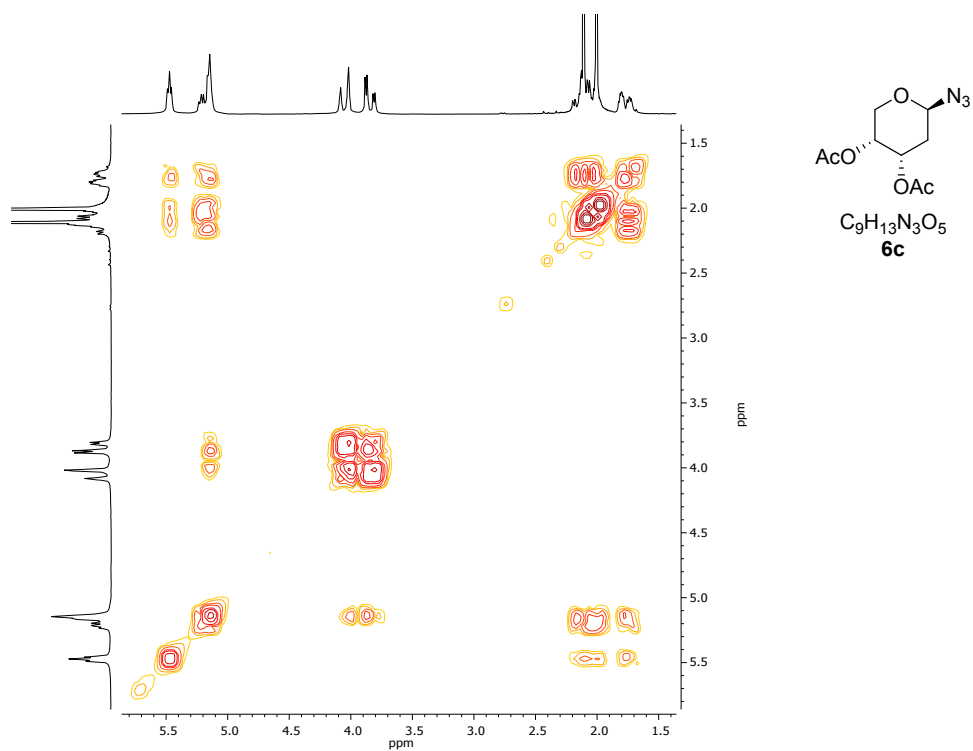

Figure S62: 2D-COSY spectrum of **6c** (200 MHz,  $CDCl_3$ ).

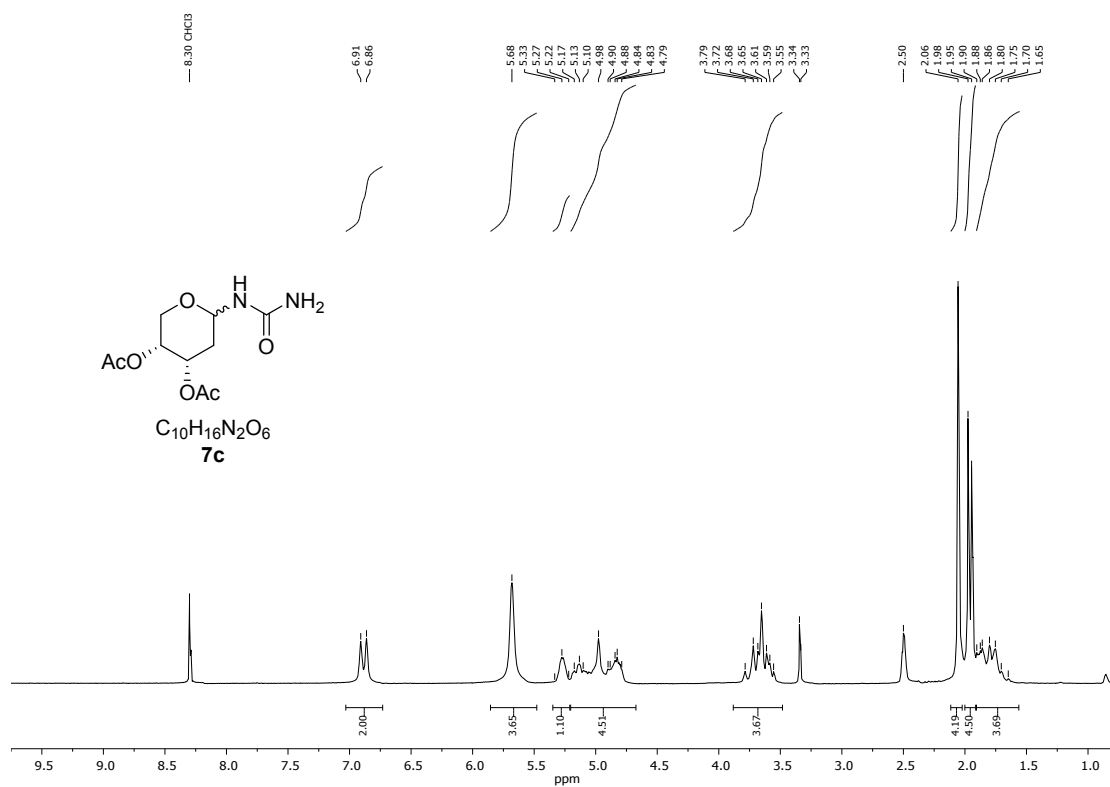

Figure S63:  $^1H$  NMR spectrum of **7c** (200 MHz, DMSO- $d_6$ ).

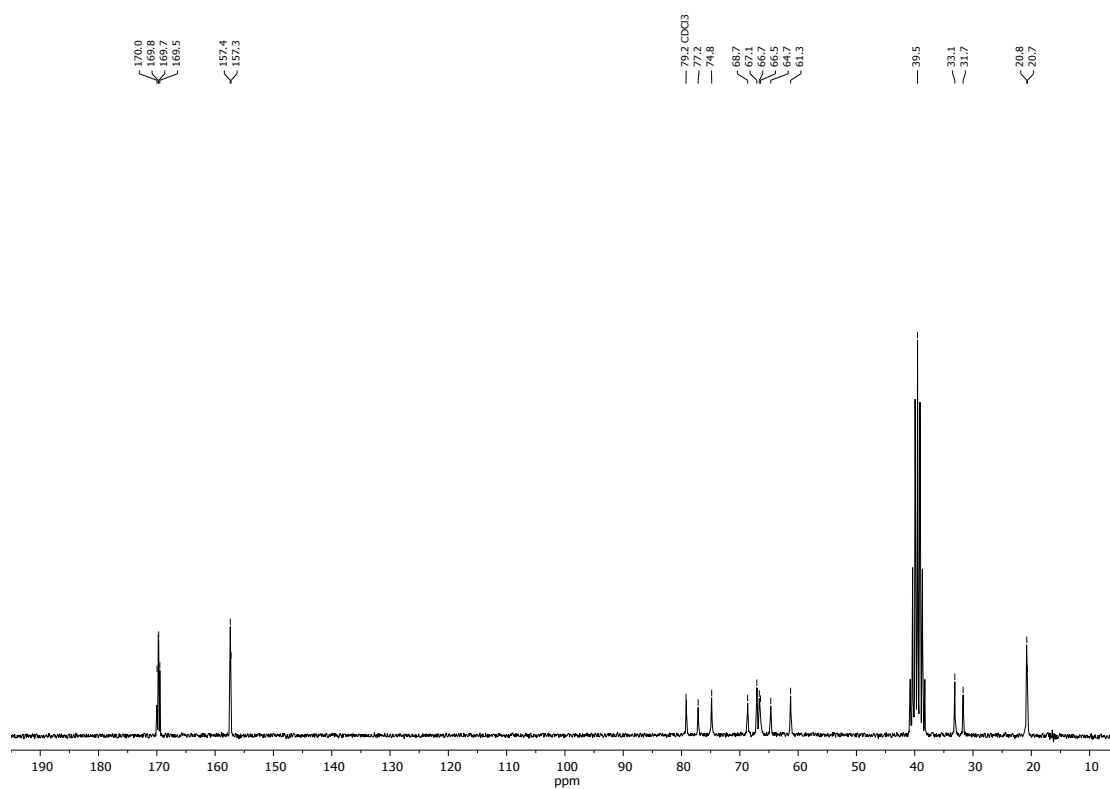

Figure S64:  $^{13}C$  NMR spectrum of **7c** (200 MHz, DMSO- $d_6$ ).

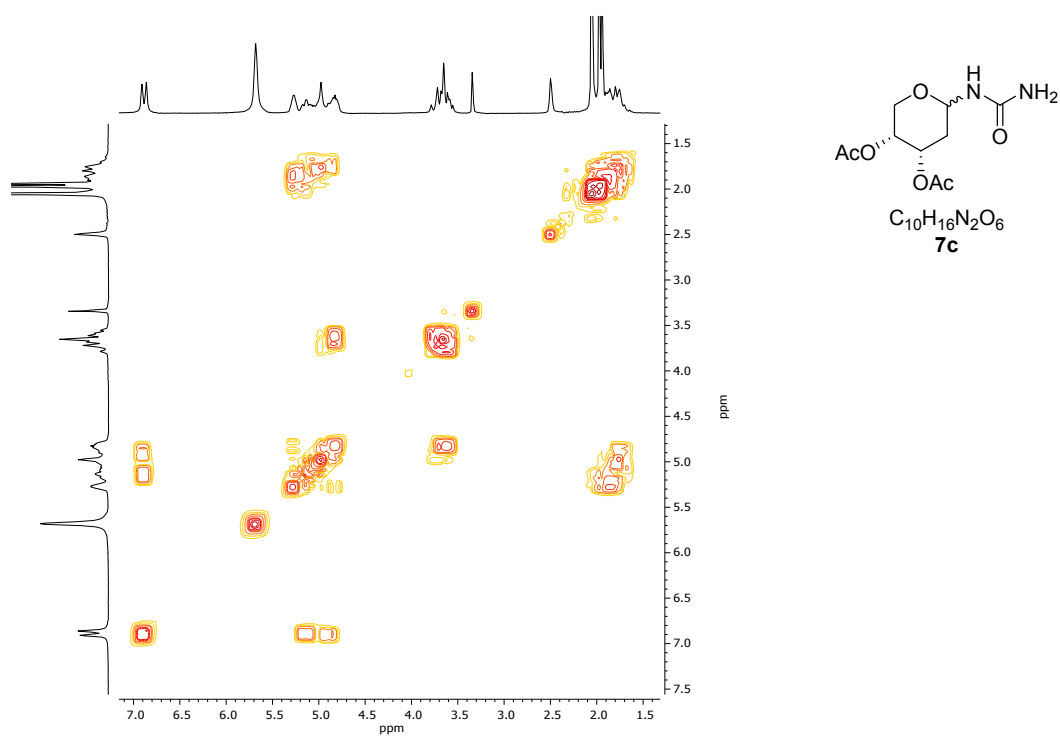

Figure S65:  $^1H$  NMR spectrum of **7c** (200 MHz,  $DMSO-d_6$ ).

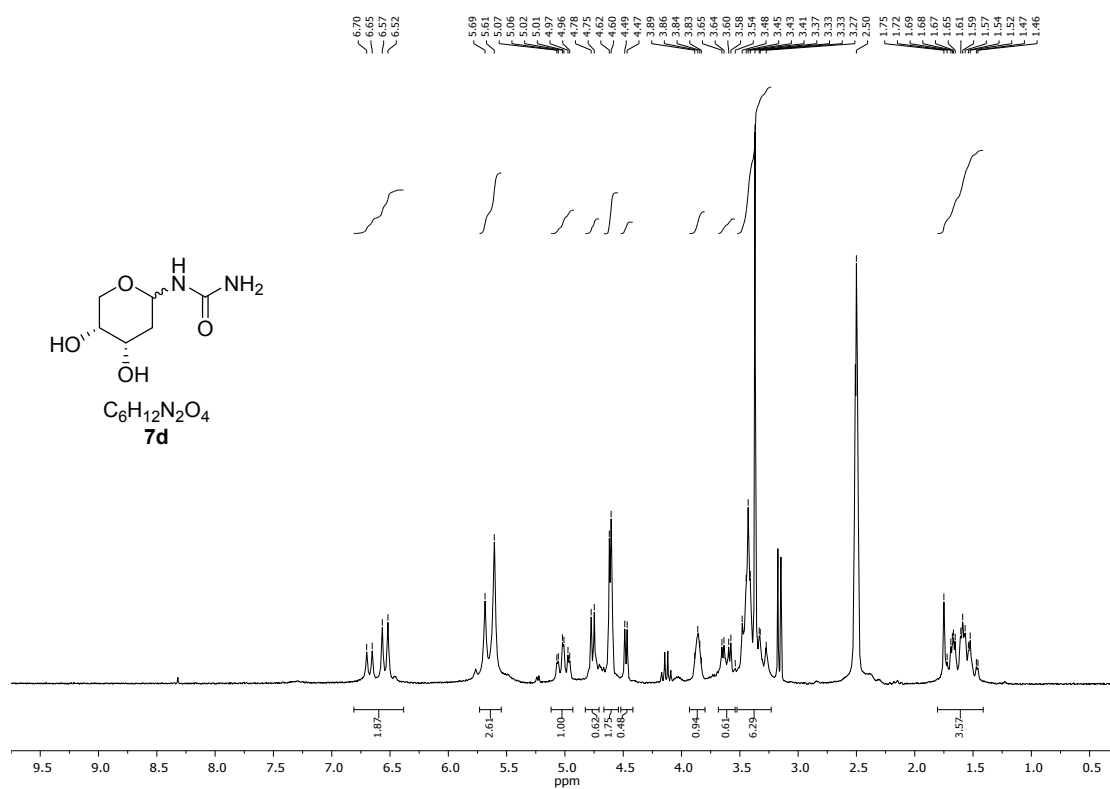

Figure S66: <sup>1</sup>H NMR spectrum of **7d** (200 MHz, DMSO-*d*<sub>6</sub>).

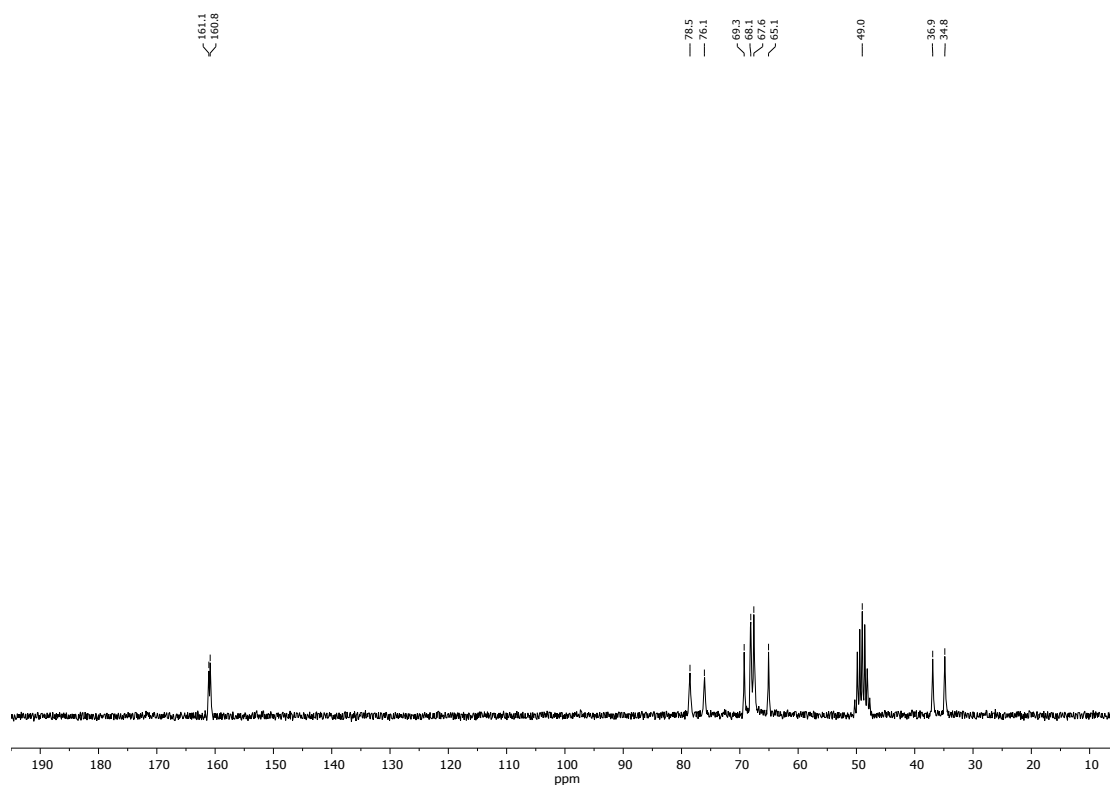

Figure S67: <sup>13</sup>C NMR spectrum of **7d** (50 MHz, CD<sub>3</sub>OD).



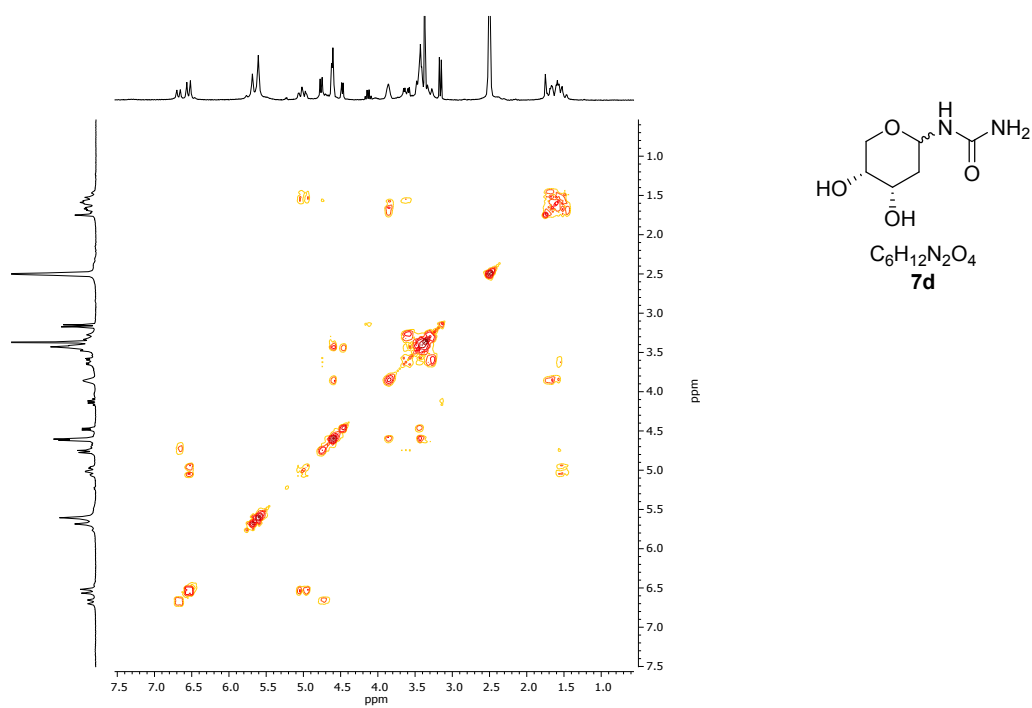

Figure S68: 2D-COSY spectrum of **7d** (200 MHz, DMSO-*d*<sub>6</sub>).

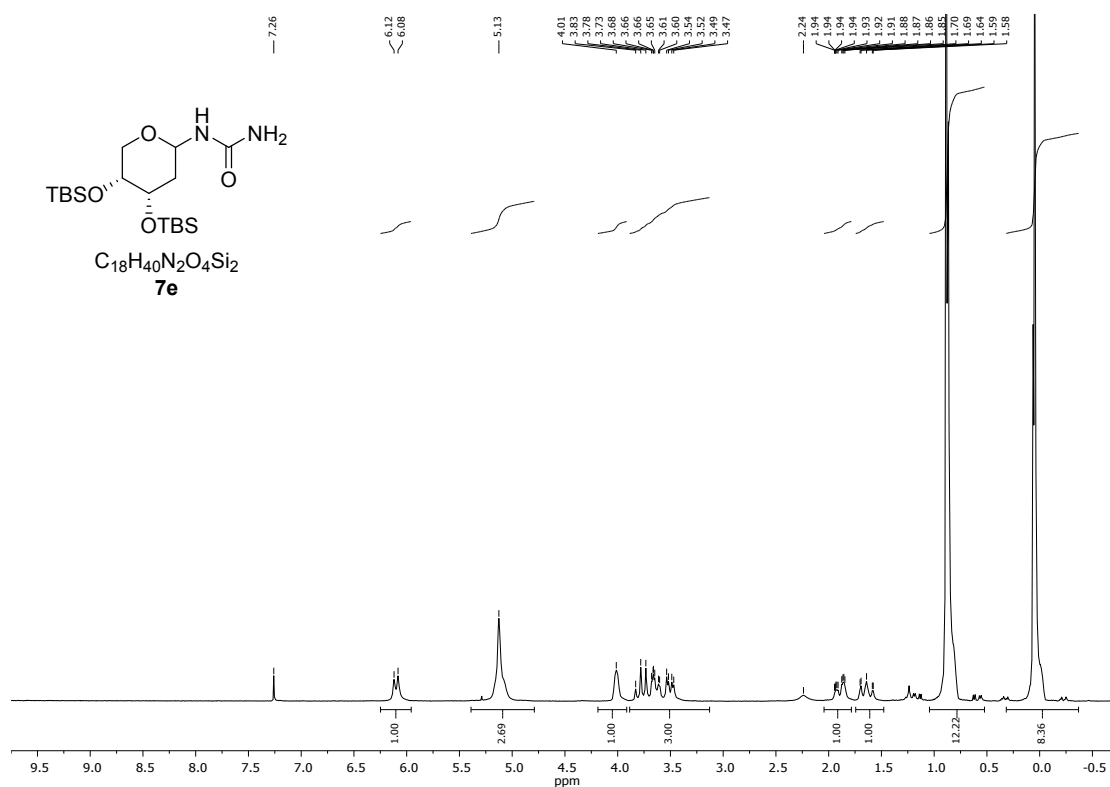

Figure S69:  $^1\text{H}$  NMR spectrum of **7e** (200 MHz,  $\text{CDCl}_3$ ).

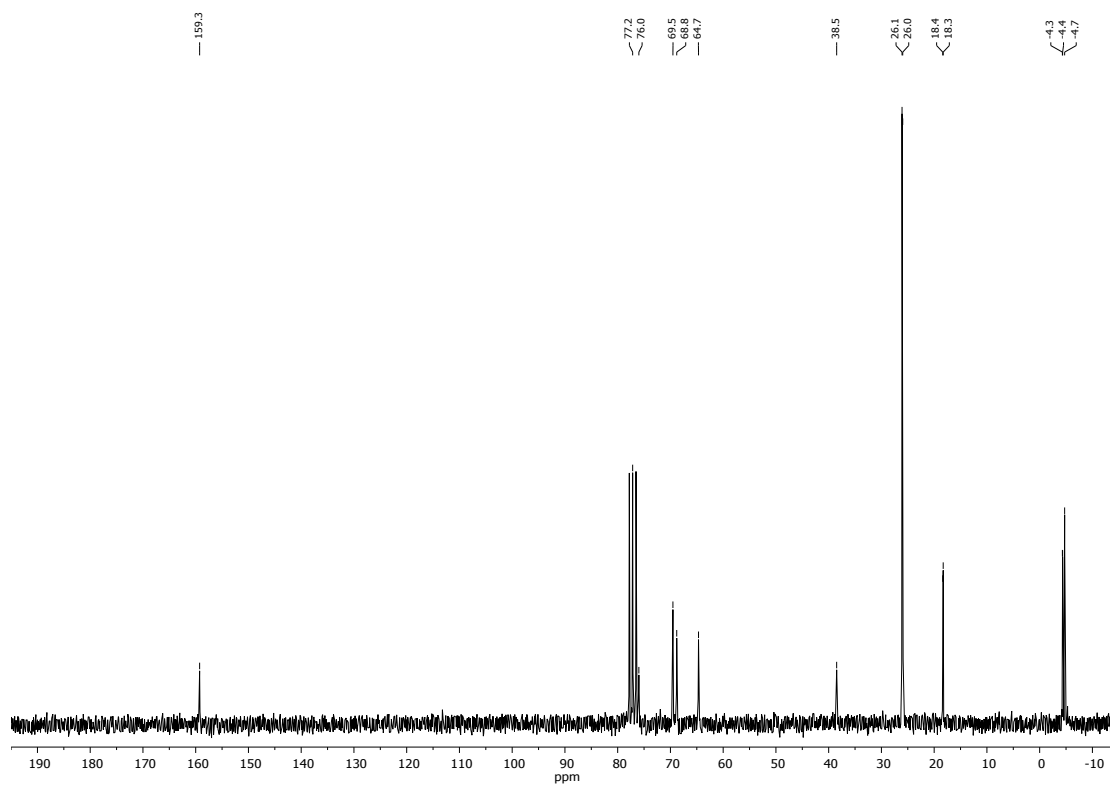

Figure S70:  $^{13}\text{C}$  NMR spectrum of **7e** (50 MHz,  $\text{CDCl}_3$ ).

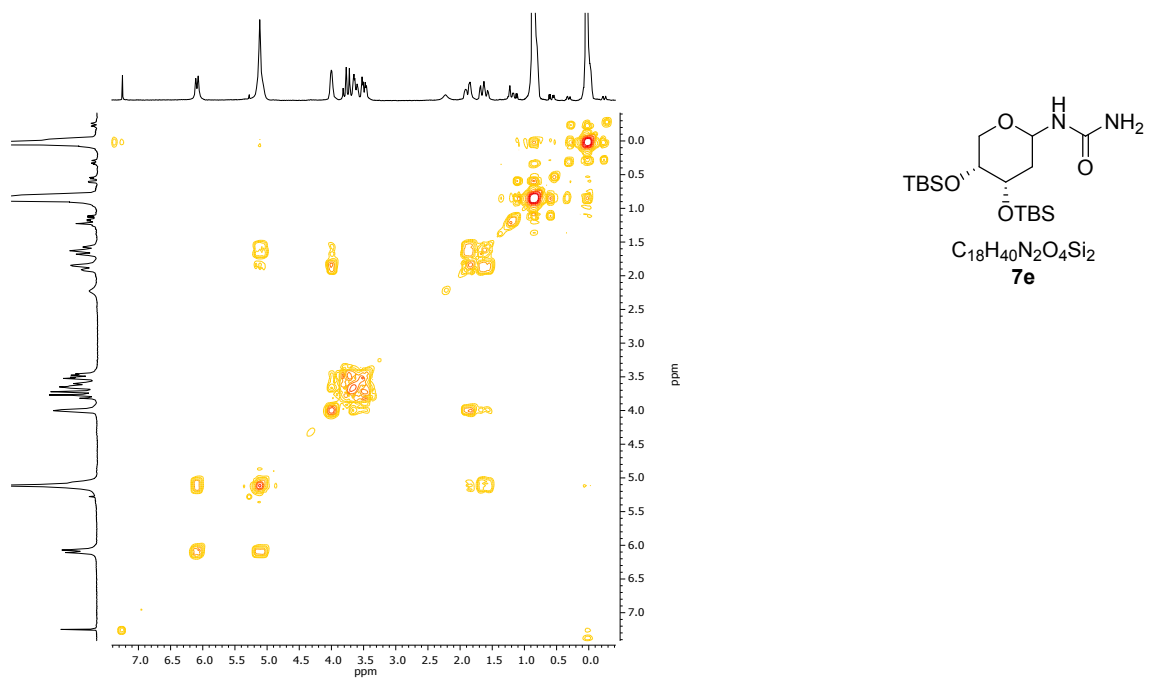

Figure S71: 2D-COSY spectrum of **7e** (200 MHz,  $CDCl_3$ ).

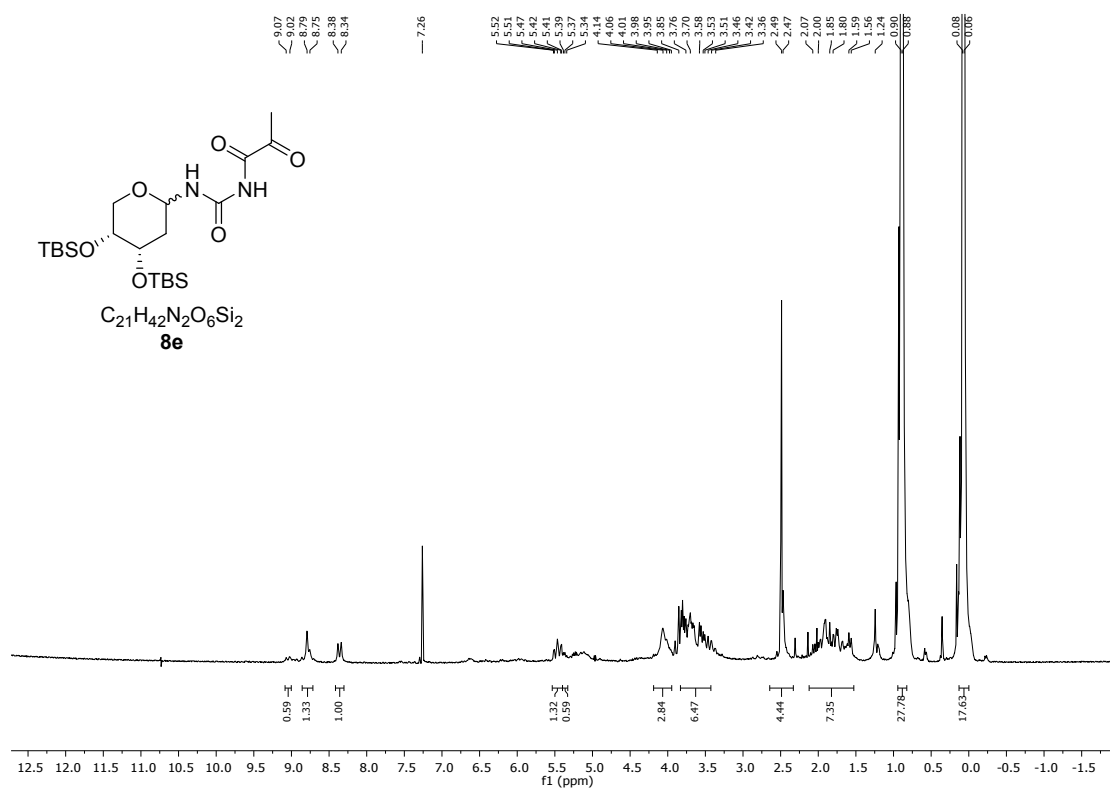

Figure S72:  $^1H$  NMR spectrum of **8e** (200 MHz,  $CDCl_3$ ).

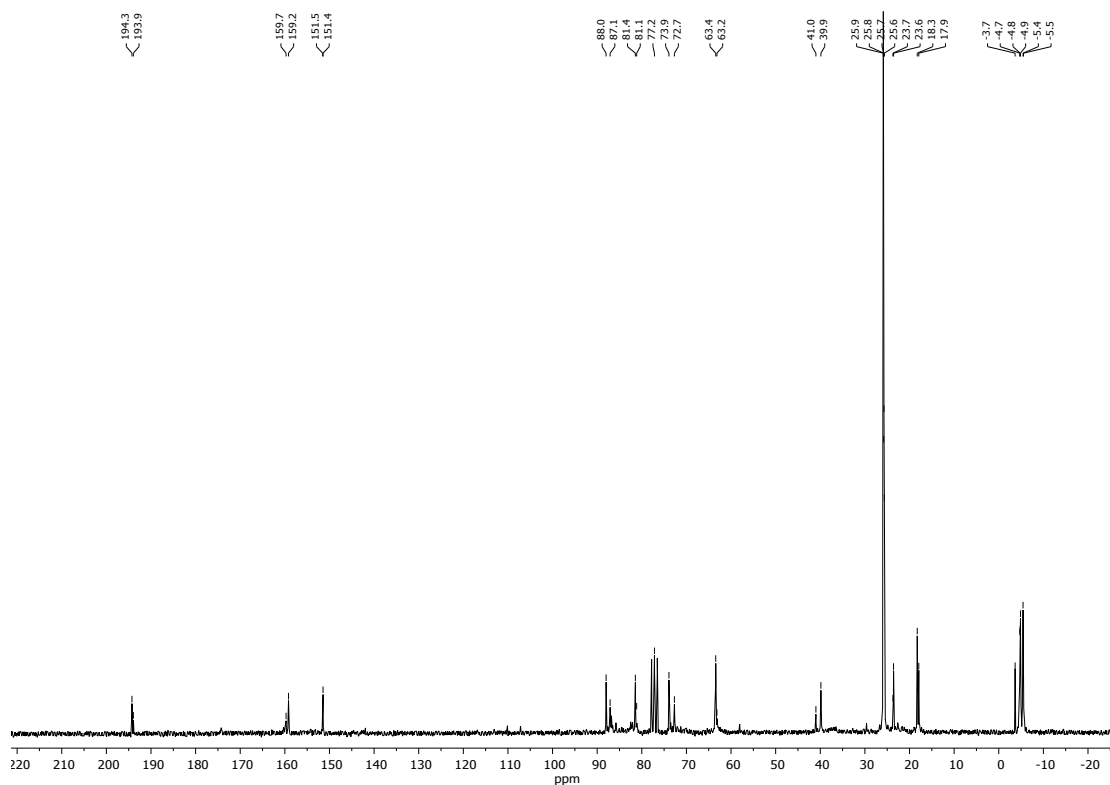

Figure S73:  $^{13}C$  NMR spectrum of **8e** (50 MHz,  $CDCl_3$ ).

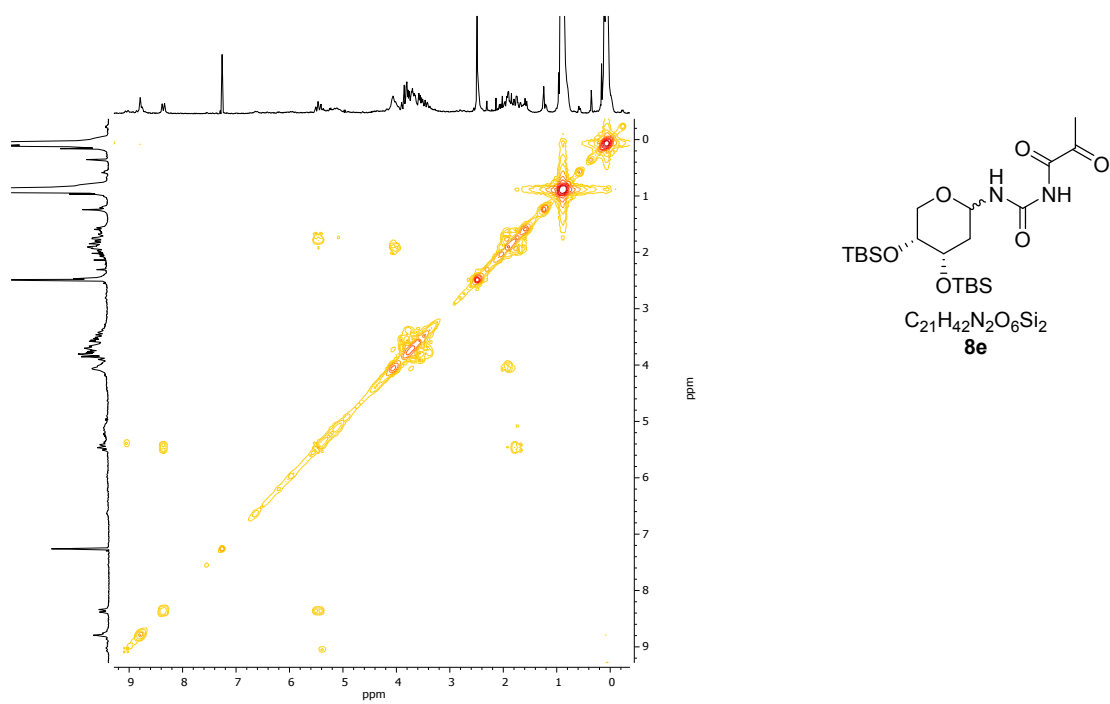

Figure S74: 2D-COSY spectrum of **8e** (200 MHz,  $CDCl_3$ ).

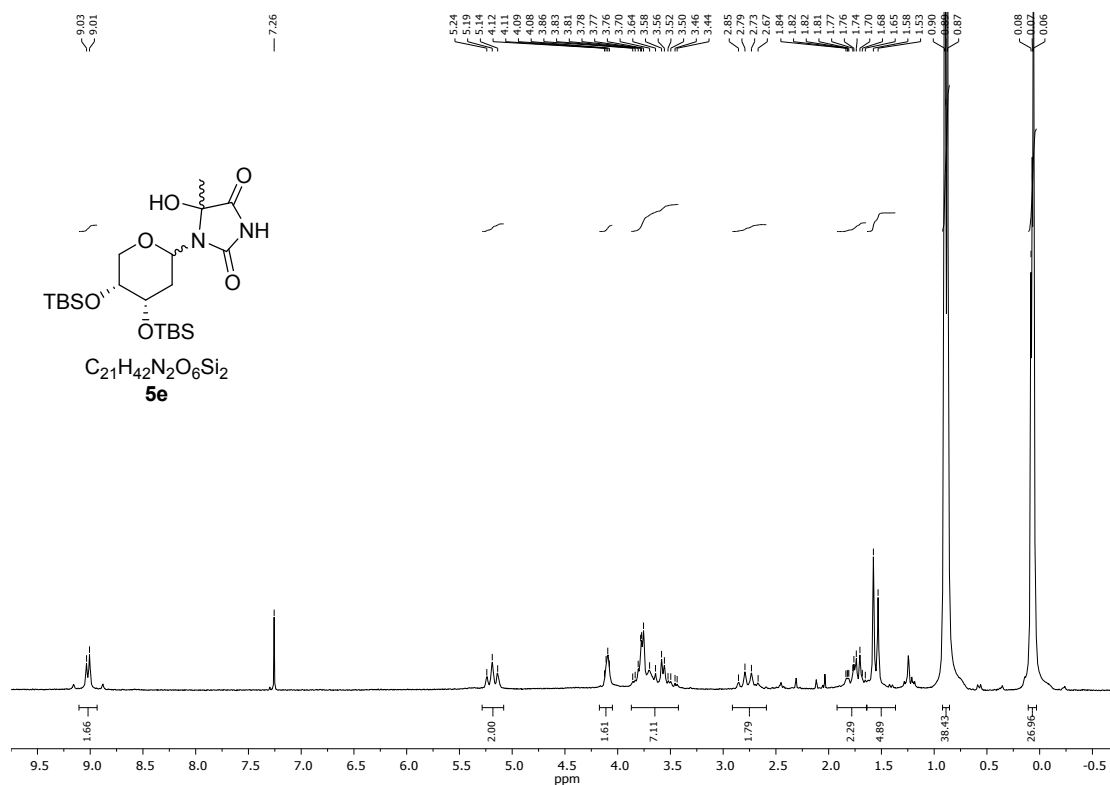

Figure S75:  $^1\text{H}$  NMR spectrum of **5e** (200 MHz,  $\text{CDCl}_3$ ).

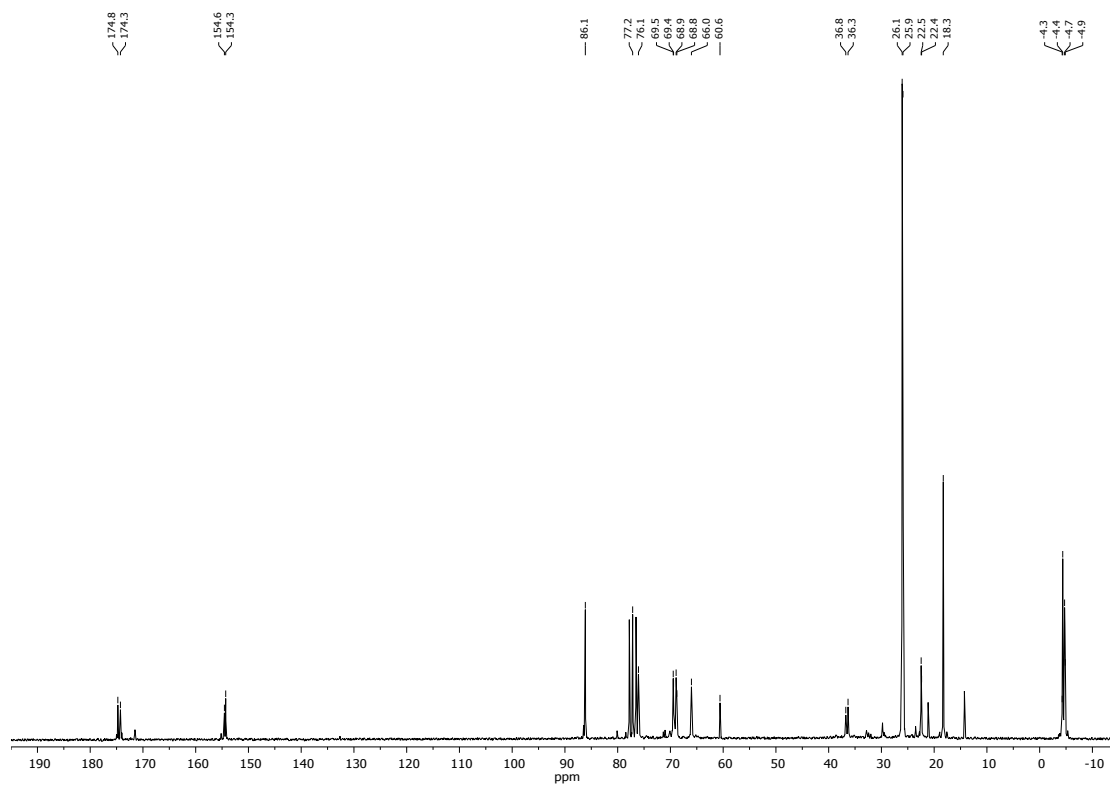

Figure S76:  $^{13}\text{C}$  NMR spectrum of **5e** (50 MHz,  $\text{CDCl}_3$ ).

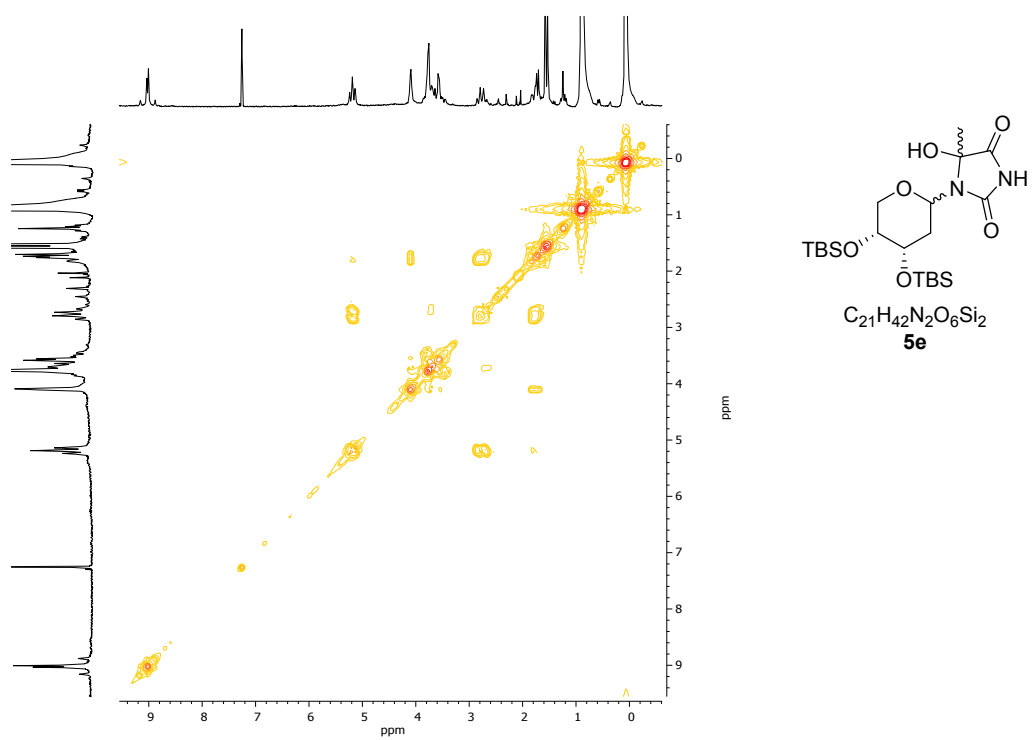

Figure S77: 2D-COSY spectrum of **5e** (200 MHz,  $CDCl_3$ ).

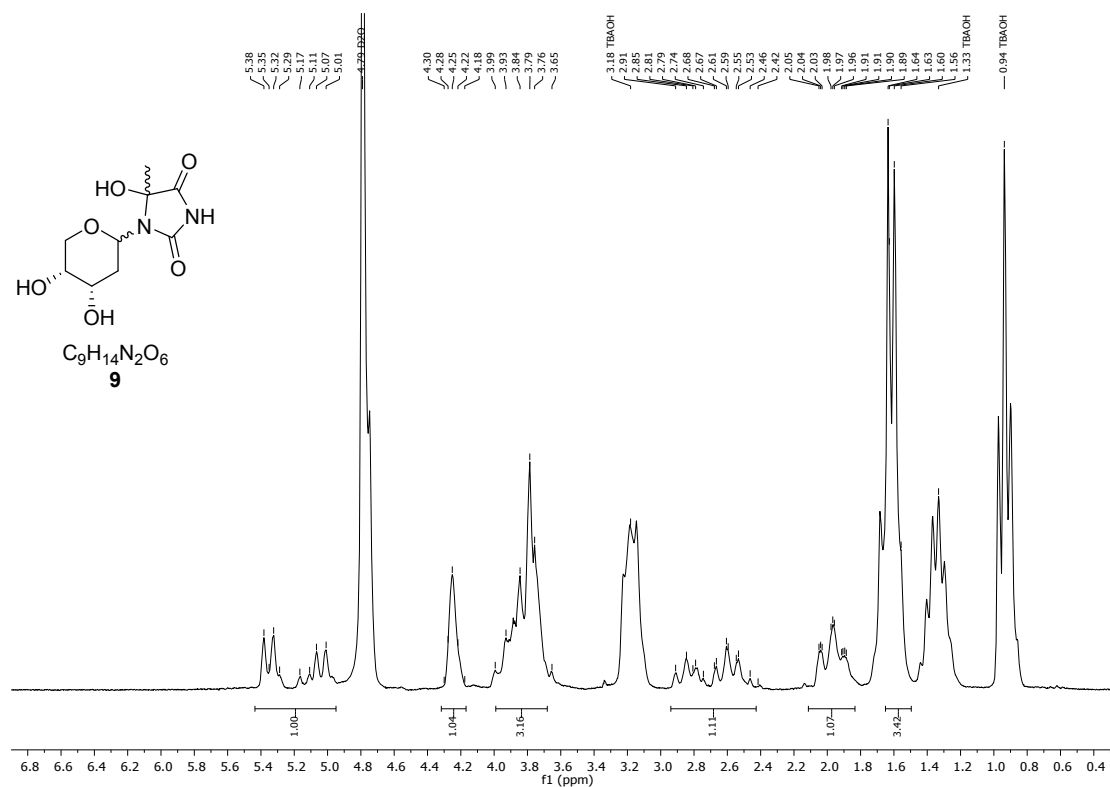

Figure S78:  $^1\text{H-NMR}$  spectrum of **9** (200 MHz,  $\text{D}_2\text{O}$ ).

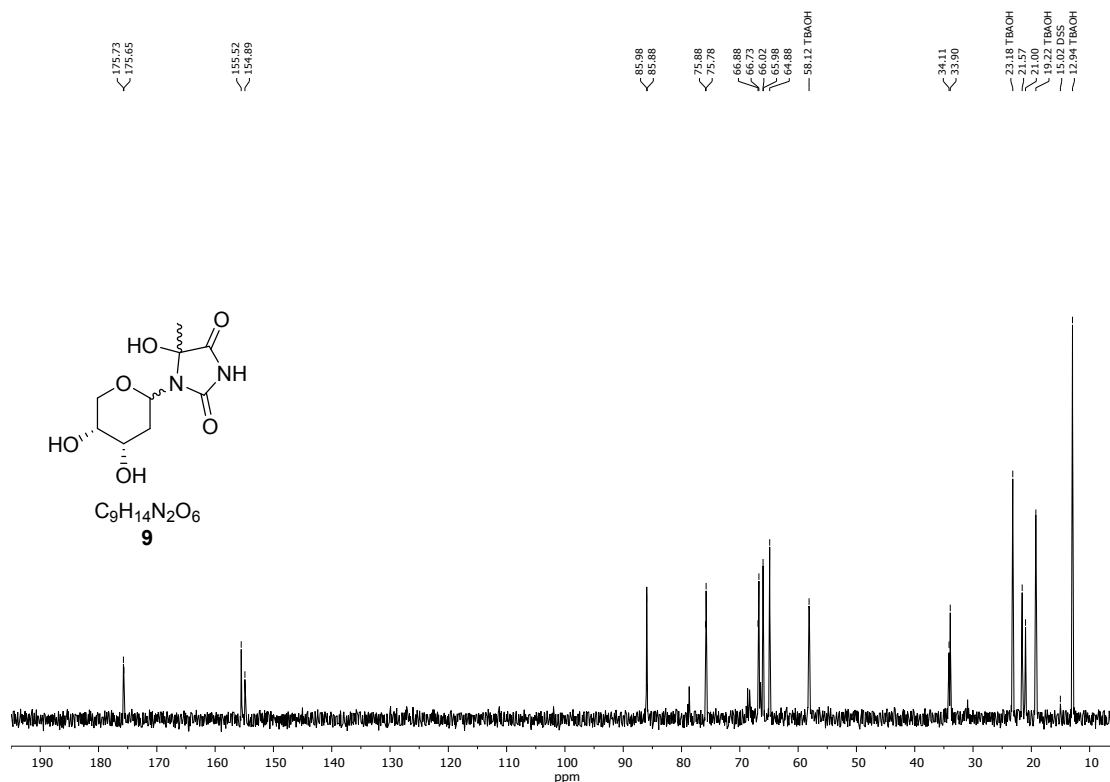

Figure S79:  $^{13}\text{C-NMR}$  spectrum of **9** (50 MHz,  $\text{D}_2\text{O}$ ).



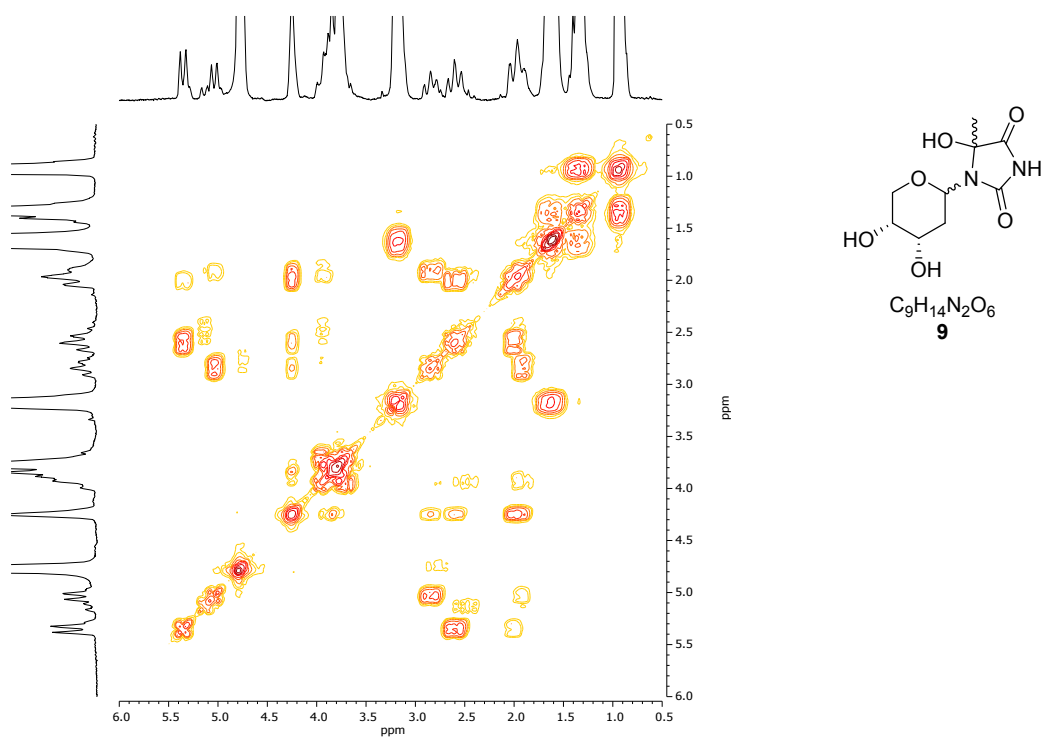

Figure S80: 2D-COSY spectrum of **9** (200 MHz, D<sub>2</sub>O).
